# Supplementary material for: Measurement report: Method for evaluating CO 2 emissions from a cement plant using atmospheric δ (O 2 ∕ N 2 ) and CO 2 measurements and its implication for future detection of CO 2 capture signals
Source: Copernicus journal article supplement (doi:10.5194/acp-24-1059-2024), 2024-01-24
Supplement: Supplementary file 1 [file acp-24-1059-2024-supplement.zip]

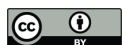

*Supplement of*

**Measurement report: Method for evaluating CO<sub>2</sub> emissions from a cement plant using atmospheric  $\delta(\text{O}_2 / \text{N}_2)$  and CO<sub>2</sub> measurements and its implication for future detection of CO<sub>2</sub> capture signals**

**Shigeyuki Ishidoya et al.**

*Correspondence to:* Shigeyuki Ishidoya (s-ishidoya@aist.go.jp)

- acp-24-1059-2024-supplement-title-page.pdf
- Supplement\_data\_model.csv
- Supplement\_data\_r.csv

The copyright of individual parts of the supplement might differ from the article licence.
