# Supplementary material for: Measurement report: Method for evaluating CO 2 emissions from a cement plant using atmospheric δ (O 2 ∕ N 2 ) and CO 2 measurements and its implication for future detection of CO 2 capture signals
Source: Copernicus journal article supplement (doi:10.5194/acp-24-1059-2024), 2024-01-24
Supplement: Supplementary file 2 [file acp-24-1059-2024-supplement.zip]

Archive with 3 entries (3 files):
- Supplement_data_model.csv
- acp-24-1059-2024-supplement-title-page.pdf
- Supplement_data_r.csv
