# Supplementary material for: Measurement report: Method for evaluating CO 2 emissions from a cement plant using atmospheric δ (O 2 ∕ N 2 ) and CO 2 measurements and its implication for future detection of CO 2 capture signals
Source: Copernicus journal article supplement (doi:10.5194/acp-24-1059-2024), 2024-01-24
Supplement: Supplementary file 2 [file acp-24-1059-2024-supplement.zip › Supplement_data_model.csv]

CO2 amount factions data simulated by AIST-MM at RYO used in the present study.
CO2 amount factions are reported in micro_mol/mol.
y(CO2) indicates the simulated CO2 amount fraction.
delta_y(CO2)FF, delta_y(CO2)TB, and delta_y(CO2)CP indicate the contributions of fossil fuel combustion, terrestrial biospheric activities, and cement production, respectively, calculated from the sources and sinks in East Japan area with no background amount fraction.
Data time zone is UTC+09:00.
See text in more detail.
Year	Month	Day	Hour	y(CO2)	delta_y(CO2)FF	delta_y(CO2)TB	delta_y(CO2)CP
2017	10	1	0	412.881	1.496	5.066	1.081
2017	10	1	1	412.221	1.457	4.634	0.892
2017	10	1	2	411.954	1.597	4.273	0.846
2017	10	1	3	411.776	1.638	4.154	0.746
2017	10	1	4	411.616	1.466	4.295	0.617
2017	10	1	5	411.387	1.220	4.424	0.505
2017	10	1	6	411.423	1.165	4.517	0.503
2017	10	1	7	411.002	1.288	3.774	0.702
2017	10	1	8	408.972	1.062	1.994	0.678
2017	10	1	9	406.467	0.499	0.676	0.054
2017	10	1	10	405.597	0.430	-0.072	0.001
2017	10	1	11	405.639	0.496	-0.095	0.000
2017	10	1	12	405.952	0.677	0.037	0.000
2017	10	1	13	407.744	1.728	0.778	0.000
2017	10	1	14	408.325	2.131	0.956	0.000
2017	10	1	15	408.713	2.542	0.933	0.000
2017	10	1	16	408.699	2.716	0.745	0.000
2017	10	1	17	408.144	2.157	0.748	0.001
2017	10	1	18	408.721	2.144	1.338	0.001
2017	10	1	19	411.440	2.762	3.440	0.000
2017	10	1	20	415.972	3.508	7.226	0.000
2017	10	1	21	419.362	3.973	10.150	0.001
2017	10	1	22	418.362	5.287	7.836	0.001
2017	10	1	23	416.107	5.685	5.182	0.002
2017	10	2	0	415.689	5.514	4.934	0.003
2017	10	2	1	415.470	4.642	5.586	0.004
2017	10	2	2	415.516	4.073	6.201	0.004
2017	10	2	3	415.472	3.776	6.454	0.004
2017	10	2	4	416.624	4.239	7.145	0.002
2017	10	2	5	417.286	4.790	7.256	0.002
2017	10	2	6	418.081	4.953	7.888	0.002
2017	10	2	7	420.355	4.996	10.120	0.001
2017	10	2	8	422.929	5.240	12.450	0.001
2017	10	2	9	422.481	5.912	11.330	0.001
2017	10	2	10	418.116	5.936	6.942	0.000
2017	10	2	11	414.586	6.053	3.295	0.000
2017	10	2	12	413.604	5.520	2.846	0.000
2017	10	2	13	411.834	4.076	2.520	0.000
2017	10	2	14	409.859	2.656	1.965	0.000
2017	10	2	15	408.290	1.673	1.379	0.000
2017	10	2	16	407.620	1.274	1.108	0.000
2017	10	2	17	407.840	1.358	1.243	0.001
2017	10	2	18	410.541	2.239	3.063	0.001
2017	10	2	19	420.246	6.414	8.591	0.003
2017	10	2	20	435.637	7.795	22.600	0.004
2017	10	2	21	451.591	7.659	38.690	0.004
2017	10	2	22	459.668	5.976	48.450	0.004
2017	10	2	23	457.095	3.841	48.010	0.006
2017	10	3	0	451.834	3.122	43.460	0.014
2017	10	3	1	432.249	2.183	24.740	0.088
2017	10	3	2	431.329	1.559	24.260	0.272
2017	10	3	3	432.801	1.437	25.630	0.496
2017	10	3	4	433.281	1.477	26.050	0.516
2017	10	3	5	433.069	1.472	25.830	0.529
2017	10	3	6	433.361	1.610	25.780	0.733
2017	10	3	7	435.653	1.827	27.190	1.398
2017	10	3	8	416.829	0.801	9.354	1.436
2017	10	3	9	410.072	0.999	3.725	0.110
2017	10	3	10	409.465	1.377	2.827	0.023
2017	10	3	11	408.808	1.289	2.259	0.022
2017	10	3	12	408.004	1.050	1.680	0.036
2017	10	3	13	406.908	1.132	0.340	0.198
2017	10	3	14	406.311	0.930	-0.085	0.228
2017	10	3	15	406.061	0.668	-0.055	0.210
2017	10	3	16	406.462	0.594	0.418	0.212
2017	10	3	17	407.797	0.886	1.208	0.465
2017	10	3	18	411.154	1.315	3.115	1.486
2017	10	3	19	412.324	1.658	4.060	1.368
2017	10	3	20	412.827	1.601	4.734	1.254
2017	10	3	21	412.542	1.350	4.686	1.268
2017	10	3	22	412.289	1.130	4.546	1.375
2017	10	3	23	412.018	0.942	4.451	1.387
2017	10	4	0	411.815	0.825	4.404	1.348
2017	10	4	1	411.509	0.713	4.457	1.101
2017	10	4	2	411.763	0.658	4.825	1.042
2017	10	4	3	412.024	0.695	4.870	1.221
2017	10	4	4	412.104	0.901	4.511	1.454
2017	10	4	5	411.613	0.816	4.077	1.482
2017	10	4	6	411.749	0.873	4.185	1.453
2017	10	4	7	411.003	1.059	3.304	1.402
2017	10	4	8	408.761	1.262	1.217	1.044
2017	10	4	9	406.347	0.710	0.237	0.162
2017	10	4	10	405.668	0.716	-0.375	0.089
2017	10	4	11	405.411	0.814	-0.720	0.079
2017	10	4	12	404.665	0.738	-1.380	0.069
2017	10	4	13	404.482	0.744	-1.560	0.060
2017	10	4	14	404.615	0.568	-1.259	0.068
2017	10	4	15	405.163	0.561	-0.747	0.111
2017	10	4	16	405.621	0.635	-0.424	0.172
2017	10	4	17	406.295	0.876	-0.100	0.281
2017	10	4	18	409.582	1.573	1.293	1.478
2017	10	4	19	410.661	1.412	2.433	1.578
2017	10	4	20	411.193	1.351	2.993	1.611
2017	10	4	21	411.428	1.273	3.299	1.618
2017	10	4	22	411.605	1.168	3.639	1.560
2017	10	4	23	411.634	1.031	3.835	1.530
2017	10	5	0	411.448	0.904	3.855	1.451
2017	10	5	1	411.108	0.792	3.804	1.274
2017	10	5	2	410.979	0.721	3.805	1.215
2017	10	5	3	410.951	0.660	3.755	1.298
2017	10	5	4	410.945	0.643	3.627	1.437
2017	10	5	5	410.881	0.652	3.550	1.441
2017	10	5	6	411.095	0.845	3.464	1.548
2017	10	5	7	410.299	1.122	2.568	1.371
2017	10	5	8	408.700	1.116	0.981	1.365
2017	10	5	9	405.974	1.001	-0.509	0.244
2017	10	5	10	404.850	1.135	-1.761	0.238
2017	10	5	11	404.378	0.746	-1.749	0.143
2017	10	5	12	404.162	0.685	-1.896	0.135
2017	10	5	13	404.037	0.627	-1.915	0.087
2017	10	5	14	404.339	0.549	-1.483	0.035
2017	10	5	15	404.550	0.604	-1.311	0.019
2017	10	5	16	404.887	0.763	-1.119	0.005
2017	10	5	17	404.904	0.760	-1.095	0.001
2017	10	5	18	405.047	0.568	-0.763	0.004
2017	10	5	19	406.647	0.673	0.730	0.006
2017	10	5	20	408.885	0.853	2.788	0.006
2017	10	5	21	411.206	1.411	4.551	0.006
2017	10	5	22	411.613	2.333	4.036	0.006
2017	10	5	23	411.450	2.780	3.426	0.006
2017	10	6	0	412.051	3.216	3.590	0.007
2017	10	6	1	412.618	3.716	3.658	0.006
2017	10	6	2	412.351	3.849	3.259	0.005
2017	10	6	3	412.277	3.635	3.399	0.005
2017	10	6	4	412.678	3.424	4.010	0.006
2017	10	6	5	412.817	3.406	4.167	0.006
2017	10	6	6	412.759	3.386	4.131	0.004
2017	10	6	7	411.523	3.319	2.963	0.003
2017	10	6	8	410.835	3.208	2.387	0.002
2017	10	6	9	410.897	3.162	2.496	0.001
2017	10	6	10	409.546	2.307	2.001	0.000
2017	10	6	11	408.821	1.920	1.663	0.000
2017	10	6	12	407.487	1.324	0.925	0.000
2017	10	6	13	406.488	0.782	0.468	0.000
2017	10	6	14	405.867	0.389	0.240	0.000
2017	10	6	15	405.580	0.177	0.165	0.000
2017	10	6	16	405.427	0.052	0.137	0.000
2017	10	6	17	405.499	0.011	0.250	0.000
2017	10	6	18	405.662	0.005	0.418	0.001
2017	10	6	19	405.823	0.001	0.583	0.001
2017	10	6	20	406.092	0.005	0.848	0.001
2017	10	6	21	406.559	0.004	1.316	0.001
2017	10	6	22	408.387	0.006	3.142	0.001
2017	10	6	23	411.295	0.019	6.037	0.001
2017	10	7	0	412.696	0.049	7.407	0.002
2017	10	7	1	413.384	0.089	8.055	0.002
2017	10	7	2	413.794	0.103	8.451	0.002
2017	10	7	3	413.414	0.091	8.084	0.001
2017	10	7	4	412.485	0.038	7.208	0.001
2017	10	7	5	411.997	0.016	6.742	0.001
2017	10	7	6	412.464	0.007	7.218	0.001
2017	10	7	7	414.136	0.006	8.891	0.001
2017	10	7	8	412.149	0.005	6.905	0.001
2017	10	7	9	408.072	0.047	2.786	0.001
2017	10	7	10	406.227	0.056	0.930	0.003
2017	10	7	11	405.349	0.005	0.106	0.000
2017	10	7	12	405.209	0.001	-0.030	0.000
2017	10	7	13	405.252	0.005	0.008	0.001
2017	10	7	14	405.392	0.010	0.141	0.003
2017	10	7	15	405.548	0.011	0.296	0.003
2017	10	7	16	405.777	0.023	0.504	0.012
2017	10	7	17	407.427	0.152	1.924	0.113
2017	10	7	18	409.838	0.185	4.090	0.325
2017	10	7	19	413.391	0.170	7.557	0.426
2017	10	7	20	416.688	0.362	10.600	0.488
2017	10	7	21	416.968	0.483	10.840	0.407
2017	10	7	22	421.458	0.523	15.300	0.397
2017	10	7	23	421.688	0.522	15.410	0.518
2017	10	8	0	420.654	0.494	14.320	0.602
2017	10	8	1	418.790	0.435	12.430	0.687
2017	10	8	2	417.987	0.456	11.590	0.703
2017	10	8	3	417.119	0.583	10.280	1.018
2017	10	8	4	415.511	1.133	7.739	1.401
2017	10	8	5	414.475	1.306	6.517	1.414
2017	10	8	6	413.839	1.221	6.057	1.323
2017	10	8	7	412.195	0.728	5.187	1.042
2017	10	8	8	409.082	0.421	2.741	0.682
2017	10	8	9	407.267	0.663	1.062	0.304
2017	10	8	10	406.787	0.434	1.084	0.031
2017	10	8	11	406.416	0.265	0.906	0.007
2017	10	8	12	406.429	0.204	0.984	0.003
2017	10	8	13	406.383	0.160	0.983	0.002
2017	10	8	14	406.468	0.156	1.071	0.003
2017	10	8	15	406.651	0.221	1.185	0.007
2017	10	8	16	406.839	0.306	1.282	0.013
2017	10	8	17	407.082	0.425	1.391	0.028
2017	10	8	18	407.570	0.543	1.719	0.070
2017	10	8	19	407.598	0.604	1.619	0.137
2017	10	8	20	407.765	0.624	1.688	0.215
2017	10	8	21	410.070	0.613	3.900	0.319
2017	10	8	22	419.759	0.514	13.780	0.227
2017	10	8	23	417.599	0.419	11.790	0.152
2017	10	9	0	413.923	0.516	7.890	0.279
2017	10	9	1	414.745	0.907	8.062	0.538
2017	10	9	2	415.948	1.381	8.326	1.003
2017	10	9	3	416.450	1.219	8.846	1.147
2017	10	9	4	416.406	0.555	10.040	0.573
2017	10	9	5	416.102	0.326	10.140	0.398
2017	10	9	6	415.591	0.391	9.615	0.347
2017	10	9	7	416.345	0.518	10.190	0.399
2017	10	9	8	414.599	0.626	8.367	0.368
2017	10	9	9	412.596	0.734	6.412	0.212
2017	10	9	10	410.579	0.316	5.020	0.005
2017	10	9	11	409.161	0.344	3.578	0.001
2017	10	9	12	408.638	0.396	3.003	0.001
2017	10	9	13	408.352	0.525	2.588	0.001
2017	10	9	14	408.493	0.888	2.366	0.001
2017	10	9	15	408.800	1.626	1.935	0.001
2017	10	9	16	409.130	2.241	1.649	0.002
2017	10	9	17	409.507	2.733	1.531	0.005
2017	10	9	18	412.216	3.770	3.192	0.016
2017	10	9	19	414.941	2.313	7.223	0.167
2017	10	9	20	414.540	1.691	7.088	0.523
2017	10	9	21	415.701	2.135	7.616	0.712
2017	10	9	22	416.906	2.344	8.430	0.894
2017	10	9	23	416.972	2.274	8.457	1.003
2017	10	10	0	416.881	2.131	8.307	1.205
2017	10	10	1	416.355	1.835	7.914	1.368
2017	10	10	2	415.833	1.565	7.596	1.434
2017	10	10	3	415.437	1.444	7.294	1.461
2017	10	10	4	415.117	1.235	7.103	1.541
2017	10	10	5	414.916	1.122	6.962	1.594
2017	10	10	6	414.801	1.417	6.763	1.383
2017	10	10	7	414.028	1.876	5.978	0.936
2017	10	10	8	411.798	2.052	3.716	0.792
2017	10	10	9	409.239	1.644	2.071	0.286
2017	10	10	10	407.644	1.226	0.992	0.188
2017	10	10	11	406.581	0.997	0.193	0.153
2017	10	10	12	406.146	0.849	-0.081	0.140
2017	10	10	13	406.110	0.803	-0.083	0.152
2017	10	10	14	406.243	0.807	0.029	0.169
2017	10	10	15	406.618	0.861	0.336	0.183
2017	10	10	16	407.365	0.929	0.970	0.228
2017	10	10	17	407.785	0.813	1.635	0.099
2017	10	10	18	407.205	0.592	1.342	0.033
2017	10	10	19	408.191	1.029	1.912	0.012
2017	10	10	20	407.874	0.896	1.729	0.011
2017	10	10	21	406.319	0.244	0.825	0.012
2017	10	10	22	406.031	0.099	0.678	0.016
2017	10	10	23	406.239	0.122	0.862	0.017
2017	10	11	0	406.720	0.195	1.267	0.020
2017	10	11	1	407.859	0.288	2.294	0.039
2017	10	11	2	409.640	0.316	4.038	0.048
2017	10	11	3	410.807	0.300	5.213	0.056
2017	10	11	4	411.428	0.266	5.852	0.072
2017	10	11	5	411.683	0.245	6.112	0.088
2017	10	11	6	411.931	0.226	6.378	0.089
2017	10	11	7	410.715	0.188	5.229	0.060
2017	10	11	8	407.713	0.151	2.281	0.043
2017	10	11	9	406.821	0.295	1.278	0.010
2017	10	11	10	406.337	0.198	0.899	0.002
2017	10	11	11	405.532	0.045	0.248	0.001
2017	10	11	12	405.270	0.002	0.029	0.001
2017	10	11	13	405.285	0.000	0.046	0.001
2017	10	11	14	405.328	0.003	0.086	0.001
2017	10	11	15	405.368	0.003	0.126	0.001
2017	10	11	16	405.487	0.008	0.238	0.003
2017	10	11	17	405.950	0.018	0.684	0.010
2017	10	11	18	408.437	0.046	3.131	0.022
2017	10	11	19	411.633	0.275	6.051	0.069
2017	10	11	20	411.239	0.354	5.577	0.070
2017	10	11	21	413.362	0.604	7.436	0.084
2017	10	11	22	416.198	0.956	9.954	0.050
2017	10	11	23	415.832	2.472	8.091	0.031
2017	10	12	0	415.996	4.356	6.393	0.009
2017	10	12	1	415.495	3.158	7.093	0.006
2017	10	12	2	415.477	1.570	8.658	0.011
2017	10	12	3	416.328	1.335	9.731	0.024
2017	10	12	4	417.522	1.362	10.840	0.082
2017	10	12	5	416.638	1.657	9.595	0.148
2017	10	12	6	416.130	1.714	8.890	0.288
2017	10	12	7	416.866	1.559	9.454	0.615
2017	10	12	8	416.432	1.600	8.923	0.671
2017	10	12	9	414.432	1.998	7.065	0.131
2017	10	12	10	407.835	0.958	1.587	0.052
2017	10	12	11	406.683	0.700	0.697	0.048
2017	10	12	12	406.393	0.632	0.453	0.070
2017	10	12	13	406.015	0.588	0.081	0.108
2017	10	12	14	405.845	0.546	-0.068	0.129
2017	10	12	15	406.079	0.601	0.067	0.173
2017	10	12	16	406.709	0.786	0.419	0.266
2017	10	12	17	408.275	1.095	1.175	0.767
2017	10	12	18	410.652	0.912	2.952	1.550
2017	10	12	19	412.663	1.004	4.886	1.535
2017	10	12	20	413.920	1.104	6.057	1.521
2017	10	12	21	414.861	1.130	6.968	1.525
2017	10	12	22	414.247	1.013	6.647	1.349
2017	10	12	23	413.812	0.882	6.614	1.078
2017	10	13	0	413.355	0.786	6.531	0.800
2017	10	13	1	414.837	0.900	7.735	0.964
2017	10	13	2	415.198	0.890	8.005	1.065
2017	10	13	3	414.424	0.764	7.368	1.054
2017	10	13	4	413.593	0.617	7.012	0.726
2017	10	13	5	414.936	0.701	8.344	0.653
2017	10	13	6	415.454	0.696	8.864	0.656
2017	10	13	7	414.040	0.583	7.572	0.647
2017	10	13	8	410.607	0.560	4.196	0.613
2017	10	13	9	408.641	0.732	2.289	0.382
2017	10	13	10	407.951	0.538	1.953	0.222
2017	10	13	11	406.643	0.275	1.119	0.011
2017	10	13	12	406.139	0.250	0.650	0.001
2017	10	13	13	405.152	0.266	-0.352	0.000
2017	10	13	14	405.072	0.559	-0.725	0.000
2017	10	13	15	405.428	0.922	-0.733	0.001
2017	10	13	16	405.041	0.553	-0.758	0.008
2017	10	13	17	406.599	0.694	0.614	0.053
2017	10	13	18	409.605	0.717	3.242	0.408
2017	10	13	19	414.885	0.943	8.110	0.594
2017	10	13	20	417.212	1.398	9.798	0.778
2017	10	13	21	416.974	1.165	9.946	0.625
2017	10	13	22	415.494	0.634	9.385	0.237
2017	10	13	23	414.613	0.437	8.870	0.068
2017	10	14	0	414.251	0.400	8.576	0.037
2017	10	14	1	414.199	0.371	8.570	0.020
2017	10	14	2	413.838	0.338	8.249	0.013
2017	10	14	3	413.522	0.284	7.988	0.012
2017	10	14	4	413.130	0.236	7.643	0.013
2017	10	14	5	412.429	0.195	6.984	0.012
2017	10	14	6	412.227	0.184	6.793	0.012
2017	10	14	7	411.527	0.186	6.092	0.011
2017	10	14	8	407.869	0.184	2.437	0.010
2017	10	14	9	406.998	0.309	1.418	0.033
2017	10	14	10	407.040	0.362	1.411	0.029
2017	10	14	11	406.815	0.436	1.124	0.017
2017	10	14	12	406.383	0.440	0.699	0.006
2017	10	14	13	406.024	0.321	0.465	0.000
2017	10	14	14	405.693	0.164	0.291	0.000
2017	10	14	15	405.419	0.053	0.128	0.000
2017	10	14	16	405.380	0.022	0.120	0.000
2017	10	14	17	405.495	0.018	0.238	0.001
2017	10	14	18	405.904	0.039	0.623	0.004
2017	10	14	19	407.749	0.172	2.307	0.032
2017	10	14	20	414.603	0.503	8.692	0.170
2017	10	14	21	414.835	1.451	7.654	0.492
2017	10	14	22	414.897	2.022	6.559	1.078
2017	10	14	23	414.591	1.854	6.273	1.226
2017	10	15	0	413.694	1.401	5.885	1.170
2017	10	15	1	412.997	0.938	5.845	0.976
2017	10	15	2	412.835	0.828	5.788	0.981
2017	10	15	3	413.029	0.805	5.883	1.103
2017	10	15	4	413.520	0.980	5.958	1.344
2017	10	15	5	413.593	1.155	5.836	1.364
2017	10	15	6	413.497	1.150	5.780	1.329
2017	10	15	7	412.530	0.955	5.038	1.299
2017	10	15	8	410.364	0.852	2.878	1.396
2017	10	15	9	407.880	1.194	1.144	0.304
2017	10	15	10	406.990	0.832	0.723	0.197
2017	10	15	11	406.475	0.521	0.645	0.071
2017	10	15	12	405.709	0.280	0.163	0.028
2017	10	15	13	405.579	0.220	0.107	0.014
2017	10	15	14	405.653	0.233	0.169	0.013
2017	10	15	15	405.774	0.360	0.138	0.038
2017	10	15	16	406.495	0.859	0.189	0.209
2017	10	15	17	408.287	0.913	1.136	1.000
2017	10	15	18	410.017	0.849	3.239	0.691
2017	10	15	19	410.552	0.528	4.580	0.206
2017	10	15	20	410.770	0.426	4.995	0.111
2017	10	15	21	411.007	0.354	5.307	0.108
2017	10	15	22	411.142	0.259	5.468	0.177
2017	10	15	23	410.852	0.255	5.134	0.225
2017	10	16	0	410.258	0.190	4.623	0.207
2017	10	16	1	409.331	-0.060	3.955	0.198
2017	10	16	2	408.940	-0.066	3.599	0.169
2017	10	16	3	408.808	-0.051	3.488	0.133
2017	10	16	4	408.480	-0.019	3.201	0.060
2017	10	16	5	408.291	-0.010	3.015	0.048
2017	10	16	6	408.212	0.000	2.935	0.039
2017	10	16	7	407.429	0.030	2.136	0.025
2017	10	16	8	406.036	0.097	0.683	0.018
2017	10	16	9	405.775	0.166	0.368	0.003
2017	10	16	10	405.730	0.171	0.319	0.002
2017	10	16	11	405.741	0.164	0.338	0.001
2017	10	16	12	405.795	0.172	0.384	0.001
2017	10	16	13	405.873	0.225	0.410	0.000
2017	10	16	14	405.920	0.284	0.398	0.000
2017	10	16	15	405.673	0.196	0.239	0.000
2017	10	16	16	405.408	0.063	0.107	0.000
2017	10	16	17	405.399	0.013	0.148	0.000
2017	10	16	18	405.575	0.003	0.333	0.001
2017	10	16	19	405.730	0.009	0.481	0.002
2017	10	16	20	406.063	0.029	0.793	0.003
2017	10	16	21	406.789	0.059	1.488	0.004
2017	10	16	22	409.331	0.132	3.955	0.006
2017	10	16	23	411.881	0.229	6.404	0.010
2017	10	17	0	411.991	0.167	6.570	0.016
2017	10	17	1	411.282	0.166	5.852	0.026
2017	10	17	2	410.804	0.212	5.324	0.030
2017	10	17	3	410.913	0.345	5.287	0.043
2017	10	17	4	411.771	0.973	5.434	0.126
2017	10	17	5	412.700	1.686	5.505	0.271
2017	10	17	6	413.130	1.743	5.686	0.463
2017	10	17	7	412.106	1.376	4.776	0.716
2017	10	17	8	409.613	0.872	2.797	0.706
2017	10	17	9	407.625	0.687	1.157	0.543
2017	10	17	10	406.340	0.616	0.448	0.038
2017	10	17	11	405.075	0.593	-0.762	0.006
2017	10	17	12	405.093	0.893	-1.056	0.018
2017	10	17	13	405.226	1.014	-1.063	0.037
2017	10	17	14	405.383	0.794	-0.689	0.040
2017	10	17	15	405.968	0.790	-0.128	0.068
2017	10	17	16	406.709	1.069	0.257	0.145
2017	10	17	17	409.550	2.071	1.270	0.971
2017	10	17	18	410.982	2.037	2.825	0.882
2017	10	17	19	412.089	2.138	3.570	1.143
2017	10	17	20	412.599	2.168	3.997	1.196
2017	10	17	21	412.451	1.974	3.987	1.252
2017	10	17	22	412.368	1.814	4.040	1.276
2017	10	17	23	412.422	1.863	4.072	1.249
2017	10	18	0	412.307	1.871	3.947	1.251
2017	10	18	1	411.603	1.528	3.775	1.062
2017	10	18	2	411.053	1.250	3.589	0.976
2017	10	18	3	410.650	1.088	3.344	0.980
2017	10	18	4	410.184	0.842	3.108	0.996
2017	10	18	5	409.878	0.699	3.003	0.938
2017	10	18	6	409.986	0.687	3.027	1.034
2017	10	18	7	409.764	0.864	2.517	1.145
2017	10	18	8	408.922	0.978	1.430	1.276
2017	10	18	9	407.024	1.121	0.405	0.260
2017	10	18	10	406.076	1.034	-0.400	0.204
2017	10	18	11	405.132	0.797	-1.059	0.156
2017	10	18	12	404.660	0.544	-1.252	0.130
2017	10	18	13	404.547	0.414	-1.196	0.091
2017	10	18	14	404.720	0.311	-0.884	0.055
2017	10	18	15	405.000	0.235	-0.507	0.034
2017	10	18	16	405.266	0.202	-0.185	0.011
2017	10	18	17	405.653	0.229	0.177	0.009
2017	10	18	18	406.379	0.257	0.865	0.019
2017	10	18	19	407.395	0.276	1.853	0.028
2017	10	18	20	411.158	0.360	5.498	0.062
2017	10	18	21	412.075	0.373	6.393	0.071
2017	10	18	22	412.224	0.351	6.567	0.068
2017	10	18	23	411.795	0.357	6.149	0.051
2017	10	19	0	411.371	0.357	5.740	0.036
2017	10	19	1	411.844	0.373	6.204	0.029
2017	10	19	2	411.999	0.449	6.273	0.039
2017	10	19	3	412.007	0.508	6.181	0.080
2017	10	19	4	411.822	0.514	5.955	0.115
2017	10	19	5	411.582	0.491	5.748	0.105
2017	10	19	6	411.117	0.500	5.297	0.082
2017	10	19	7	409.449	0.488	3.674	0.049
2017	10	19	8	407.623	0.323	2.043	0.019
2017	10	19	9	406.044	0.124	0.677	0.005
2017	10	19	10	405.705	0.122	0.343	0.002
2017	10	19	11	405.873	0.252	0.382	0.001
2017	10	19	12	405.901	0.316	0.347	0.000
2017	10	19	13	405.692	0.257	0.197	0.000
2017	10	19	14	405.453	0.130	0.085	0.000
2017	10	19	15	405.349	0.048	0.063	0.000
2017	10	19	16	405.366	0.015	0.112	0.001
2017	10	19	17	405.650	0.010	0.400	0.002
2017	10	19	18	405.788	0.011	0.537	0.002
2017	10	19	19	405.786	0.014	0.533	0.001
2017	10	19	20	405.955	0.024	0.692	0.001
2017	10	19	21	406.091	0.030	0.822	0.001
2017	10	19	22	405.909	0.011	0.659	0.001
2017	10	19	23	405.723	0.001	0.483	0.001
2017	10	20	0	405.869	-0.005	0.635	0.001
2017	10	20	1	407.265	-0.005	2.030	0.002
2017	10	20	2	409.018	-0.001	3.779	0.002
2017	10	20	3	410.037	0.001	4.795	0.003
2017	10	20	4	409.175	0.058	3.874	0.005
2017	10	20	5	408.672	0.159	3.263	0.012
2017	10	20	6	408.416	0.125	3.043	0.010
2017	10	20	7	407.942	0.128	2.570	0.006
2017	10	20	8	407.303	0.114	1.947	0.004
2017	10	20	9	407.057	0.171	1.644	0.004
2017	10	20	10	405.752	0.064	0.449	0.001
2017	10	20	11	405.311	0.005	0.067	0.001
2017	10	20	12	405.242	-0.008	0.012	0.000
2017	10	20	13	405.272	-0.003	0.037	0.000
2017	10	20	14	405.301	-0.002	0.065	0.000
2017	10	20	15	405.331	-0.005	0.098	0.000
2017	10	20	16	405.407	-0.001	0.170	0.000
2017	10	20	17	405.732	-0.002	0.495	0.001
2017	10	20	18	406.311	-0.004	1.075	0.002
2017	10	20	19	406.559	0.000	1.318	0.003
2017	10	20	20	407.209	0.023	1.945	0.003
2017	10	20	21	408.512	0.045	3.225	0.004
2017	10	20	22	408.486	0.042	3.201	0.005
2017	10	20	23	407.860	0.026	2.590	0.006
2017	10	21	0	407.686	0.019	2.423	0.006
2017	10	21	1	407.791	0.010	2.536	0.007
2017	10	21	2	407.786	0.006	2.534	0.008
2017	10	21	3	407.810	0.004	2.560	0.008
2017	10	21	4	407.917	0.002	2.667	0.010
2017	10	21	5	407.954	-0.002	2.708	0.010
2017	10	21	6	408.021	-0.003	2.777	0.009
2017	10	21	7	407.650	-0.003	2.407	0.008
2017	10	21	8	406.522	-0.004	1.279	0.009
2017	10	21	9	405.848	-0.001	0.598	0.013
2017	10	21	10	405.636	0.079	0.306	0.013
2017	10	21	11	405.511	0.096	0.164	0.013
2017	10	21	12	405.412	0.100	0.064	0.010
2017	10	21	13	405.442	0.090	0.105	0.009
2017	10	21	14	405.474	0.091	0.131	0.014
2017	10	21	15	405.649	0.125	0.260	0.026
2017	10	21	16	406.666	0.342	1.009	0.077
2017	10	21	17	411.634	0.437	5.847	0.112
2017	10	21	18	416.064	0.398	10.340	0.088
2017	10	21	19	417.104	0.265	11.560	0.041
2017	10	21	20	417.136	0.220	11.640	0.038
2017	10	21	21	417.214	0.193	11.740	0.043
2017	10	21	22	417.147	0.189	11.650	0.070
2017	10	21	23	416.383	0.244	10.820	0.081
2017	10	22	0	415.064	0.243	9.550	0.033
2017	10	22	1	414.578	0.124	9.206	0.010
2017	10	22	2	414.838	0.077	9.514	0.009
2017	10	22	3	415.203	0.069	9.884	0.012
2017	10	22	4	415.445	0.071	10.120	0.016
2017	10	22	5	415.646	0.092	10.290	0.026
2017	10	22	6	414.521	0.080	9.172	0.031
2017	10	22	7	413.768	0.035	8.479	0.016
2017	10	22	8	412.720	0.034	7.431	0.017
2017	10	22	9	410.287	0.049	4.982	0.018
2017	10	22	10	408.301	0.120	2.936	0.007
2017	10	22	11	407.336	0.160	1.934	0.004
2017	10	22	12	406.811	0.196	1.374	0.003
2017	10	22	13	406.720	0.241	1.239	0.002
2017	10	22	14	407.844	0.540	2.064	0.002
2017	10	22	15	409.488	1.455	2.791	0.004
2017	10	22	16	408.422	1.383	1.798	0.003
2017	10	22	17	407.621	0.996	1.384	0.003
2017	10	22	18	407.589	0.833	1.516	0.002
2017	10	22	19	407.827	0.799	1.788	0.002
2017	10	22	20	407.704	0.650	1.814	0.002
2017	10	22	21	407.391	0.363	1.789	0.001
2017	10	22	22	406.744	0.155	1.350	0.001
2017	10	22	23	406.167	0.062	0.866	0.001
2017	10	23	0	405.637	0.023	0.375	0.001
2017	10	23	1	405.392	0.004	0.150	0.000
2017	10	23	2	405.360	0.001	0.121	0.000
2017	10	23	3	405.364	0.001	0.125	0.000
2017	10	23	4	405.425	0.008	0.179	0.000
2017	10	23	5	405.461	0.009	0.214	0.000
2017	10	23	6	405.533	0.011	0.284	0.000
2017	10	23	7	405.667	0.011	0.417	0.001
2017	10	23	8	405.546	0.058	0.249	0.001
2017	10	23	9	405.392	0.045	0.104	0.005
2017	10	23	10	405.170	0.124	-0.271	0.079
2017	10	23	11	405.085	0.195	-0.468	0.120
2017	10	23	12	405.113	0.305	-0.571	0.141
2017	10	23	13	405.682	0.673	-0.452	0.223
2017	10	23	14	406.062	0.836	-0.252	0.240
2017	10	23	15	406.382	0.889	-0.006	0.261
2017	10	23	16	406.913	0.973	0.396	0.306
2017	10	23	17	408.680	1.133	0.949	1.360
2017	10	23	18	410.137	0.832	2.241	1.826
2017	10	23	19	410.290	1.161	2.632	1.259
2017	10	23	20	410.260	0.942	3.000	1.080
2017	10	23	21	409.960	0.730	2.809	1.183
2017	10	23	22	409.057	0.477	2.378	0.964
2017	10	23	23	408.904	0.434	2.263	0.969
2017	10	24	0	409.120	0.438	2.334	1.110
2017	10	24	1	409.524	0.337	2.578	1.371
2017	10	24	2	409.755	0.270	2.725	1.522
2017	10	24	3	409.973	0.288	2.912	1.535
2017	10	24	4	410.933	0.526	3.672	1.497
2017	10	24	5	411.840	0.668	4.405	1.529
2017	10	24	6	412.190	0.858	4.603	1.491
2017	10	24	7	411.285	0.761	3.954	1.332
2017	10	24	8	409.290	0.630	2.492	0.930
2017	10	24	9	407.632	0.618	1.023	0.753
2017	10	24	10	405.794	0.624	-0.096	0.028
2017	10	24	11	404.939	0.787	-1.089	0.003
2017	10	24	12	404.612	0.868	-1.496	0.002
2017	10	24	13	404.821	0.937	-1.355	0.001
2017	10	24	14	404.419	0.813	-1.632	0.000
2017	10	24	15	404.655	0.668	-1.251	0.000
2017	10	24	16	405.189	0.751	-0.801	0.001
2017	10	24	17	406.303	0.884	0.177	0.004
2017	10	24	18	407.705	1.225	1.232	0.010
2017	10	24	19	410.374	1.234	3.893	0.009
2017	10	24	20	411.021	1.743	4.033	0.007
2017	10	24	21	411.934	2.498	4.192	0.006
2017	10	24	22	413.058	3.192	4.621	0.007
2017	10	24	23	413.520	3.638	4.637	0.007
2017	10	25	0	414.185	3.950	4.990	0.007
2017	10	25	1	415.044	4.125	5.674	0.007
2017	10	25	2	414.919	3.950	5.721	0.010
2017	10	25	3	414.923	3.824	5.848	0.013
2017	10	25	4	414.520	3.825	5.449	0.008
2017	10	25	5	413.975	3.764	4.967	0.006
2017	10	25	6	413.684	3.820	4.621	0.005
2017	10	25	7	412.744	3.421	4.077	0.008
2017	10	25	8	409.548	1.848	2.455	0.007
2017	10	25	9	407.975	1.722	1.003	0.012
2017	10	25	10	408.558	2.701	0.585	0.034
2017	10	25	11	406.852	1.709	-0.140	0.045
2017	10	25	12	406.129	1.042	-0.231	0.080
2017	10	25	13	406.364	1.161	-0.225	0.190
2017	10	25	14	406.904	1.295	0.115	0.256
2017	10	25	15	407.694	1.497	0.544	0.415
2017	10	25	16	409.293	1.314	1.061	1.680
2017	10	25	17	410.857	1.628	2.422	1.569
2017	10	25	18	412.277	2.377	3.370	1.292
2017	10	25	19	411.945	2.274	3.544	0.889
2017	10	25	20	411.833	2.018	3.759	0.818
2017	10	25	21	411.630	1.823	3.613	0.956
2017	10	25	22	411.348	1.448	3.452	1.210
2017	10	25	23	411.104	1.276	3.295	1.295
2017	10	26	0	410.957	1.186	3.198	1.335
2017	10	26	1	410.841	1.029	3.246	1.328
2017	10	26	2	410.780	0.877	3.348	1.317
2017	10	26	3	410.727	0.763	3.428	1.298
2017	10	26	4	410.915	0.772	3.614	1.291
2017	10	26	5	411.041	0.780	3.724	1.299
2017	10	26	6	411.293	0.928	3.781	1.346
2017	10	26	7	411.166	1.306	3.280	1.342
2017	10	26	8	410.151	1.521	2.144	1.248
2017	10	26	9	408.683	1.606	0.532	1.307
2017	10	26	10	406.583	1.949	-1.333	0.729
2017	10	26	11	404.697	1.147	-1.962	0.274
2017	10	26	12	404.587	0.829	-1.689	0.209
2017	10	26	13	404.891	0.756	-1.284	0.181
2017	10	26	14	405.374	0.740	-0.783	0.179
2017	10	26	15	405.930	0.702	-0.180	0.170
2017	10	26	16	406.470	0.908	0.060	0.264
2017	10	26	17	409.037	0.291	2.037	1.471
2017	10	26	18	412.563	1.003	4.938	1.384
2017	10	26	19	414.040	1.415	6.249	1.138
2017	10	26	20	414.879	1.371	7.172	1.098
2017	10	26	21	414.931	1.244	7.595	0.854
2017	10	26	22	412.826	0.415	7.048	0.125
2017	10	26	23	411.723	0.368	6.070	0.047
2017	10	27	0	411.481	0.338	5.852	0.053
2017	10	27	1	411.422	0.333	5.758	0.093
2017	10	27	2	411.797	0.467	5.892	0.200
2017	10	27	3	413.494	1.030	6.581	0.645
2017	10	27	4	413.329	0.593	6.755	0.743
2017	10	27	5	412.615	0.257	6.925	0.195
2017	10	27	6	412.496	0.188	6.924	0.146
2017	10	27	7	411.811	0.048	6.473	0.052
2017	10	27	8	409.315	0.007	4.031	0.039
2017	10	27	9	406.377	0.133	0.996	0.010
2017	10	27	10	405.793	0.104	0.448	0.003
2017	10	27	11	405.722	0.124	0.358	0.002
2017	10	27	12	405.738	0.148	0.350	0.002
2017	10	27	13	405.817	0.177	0.400	0.002
2017	10	27	14	405.893	0.207	0.446	0.002
2017	10	27	15	405.967	0.234	0.492	0.003
2017	10	27	16	406.094	0.248	0.600	0.008
2017	10	27	17	406.746	0.258	1.220	0.030
2017	10	27	18	408.779	0.268	3.237	0.036
2017	10	27	19	410.770	0.303	5.207	0.022
2017	10	27	20	411.773	0.366	6.139	0.030
2017	10	27	21	412.922	0.365	7.287	0.032
2017	10	27	22	413.175	0.371	7.536	0.030
2017	10	27	23	412.804	0.357	7.183	0.026
2017	10	28	0	412.335	0.345	6.726	0.026
2017	10	28	1	411.975	0.363	6.346	0.028
2017	10	28	2	411.567	0.387	5.914	0.028
2017	10	28	3	411.249	0.383	5.601	0.027
2017	10	28	4	410.769	0.339	5.171	0.021
2017	10	28	5	410.531	0.272	5.005	0.016
2017	10	28	6	410.631	0.199	5.181	0.013
2017	10	28	7	410.325	0.163	4.919	0.005
2017	10	28	8	408.231	0.171	2.818	0.004
2017	10	28	9	406.385	0.313	0.758	0.076
2017	10	28	10	406.123	0.258	0.573	0.054
2017	10	28	11	406.275	0.262	0.734	0.041
2017	10	28	12	406.317	0.233	0.824	0.022
2017	10	28	13	405.790	0.122	0.424	0.006
2017	10	28	14	405.392	0.057	0.096	0.001
2017	10	28	15	405.424	0.073	0.112	0.001
2017	10	28	16	405.627	0.144	0.243	0.002
2017	10	28	17	406.503	0.351	0.907	0.007
2017	10	28	18	408.462	0.655	2.563	0.006
2017	10	28	19	411.059	0.900	4.918	0.003
2017	10	28	20	411.279	1.392	4.646	0.003
2017	10	28	21	411.969	2.145	4.583	0.003
2017	10	28	22	413.803	3.249	5.314	0.002
2017	10	28	23	413.999	3.705	5.054	0.002
2017	10	29	0	413.570	3.203	5.126	0.003
2017	10	29	1	413.559	2.722	5.594	0.005
2017	10	29	2	413.796	2.593	5.958	0.007
2017	10	29	3	414.597	2.650	6.700	0.009
2017	10	29	4	415.898	2.630	8.010	0.020
2017	10	29	5	416.313	2.593	8.452	0.030
2017	10	29	6	416.790	2.428	9.071	0.053
2017	10	29	7	416.007	2.272	8.343	0.154
2017	10	29	8	411.559	2.056	4.221	0.044
2017	10	29	9	407.948	0.290	2.419	0.001
2017	10	29	10	407.110	0.255	1.616	0.001
2017	10	29	11	406.473	0.231	1.003	0.001
2017	10	29	12	405.929	0.142	0.549	0.000
2017	10	29	13	405.567	0.024	0.304	0.001
2017	10	29	14	405.497	0.008	0.250	0.001
2017	10	29	15	405.599	0.006	0.353	0.002
2017	10	29	16	406.333	0.011	1.079	0.005
2017	10	29	17	410.473	0.037	5.179	0.019
2017	10	29	18	420.742	0.116	15.310	0.078
2017	10	29	19	430.894	0.475	24.000	1.181
2017	10	29	20	433.940	1.087	26.010	1.605
2017	10	29	21	435.947	1.188	27.940	1.581
2017	10	29	22	437.936	1.771	30.230	0.697
2017	10	29	23	440.187	1.872	32.420	0.657
2017	10	30	0	424.260	2.309	15.600	1.113
2017	10	30	1	414.402	1.061	6.455	1.648
2017	10	30	2	413.216	0.958	5.364	1.656
2017	10	30	3	413.113	1.020	5.392	1.463
2017	10	30	4	412.420	0.701	5.377	1.104
2017	10	30	5	410.933	0.599	3.952	1.144
2017	10	30	6	410.591	0.820	3.412	1.121
2017	10	30	7	410.121	0.893	3.018	0.972
2017	10	30	8	408.808	1.258	1.728	0.584
2017	10	30	9	406.093	0.561	0.214	0.080
2017	10	30	10	405.184	0.364	-0.470	0.052
2017	10	30	11	404.659	0.275	-0.901	0.047
2017	10	30	12	404.466	0.192	-0.998	0.034
2017	10	30	13	404.725	0.173	-0.715	0.029
2017	10	30	14	405.208	0.178	-0.239	0.031
2017	10	30	15	405.577	0.269	0.008	0.062
2017	10	30	16	406.154	0.522	0.236	0.158
2017	10	30	17	408.036	1.156	0.765	0.877
2017	10	30	18	409.470	1.246	1.755	1.231
2017	10	30	19	410.809	1.333	2.668	1.570
2017	10	30	20	411.752	1.510	3.437	1.567
2017	10	30	21	412.410	1.586	3.981	1.605
2017	10	30	22	412.965	1.605	4.517	1.605
2017	10	30	23	412.993	1.470	4.758	1.527
2017	10	31	0	412.929	1.353	4.853	1.485
2017	10	31	1	412.677	1.294	4.698	1.447
2017	10	31	2	412.565	1.291	4.632	1.404
2017	10	31	3	412.566	1.536	4.384	1.408
2017	10	31	4	411.445	1.559	3.786	0.862
2017	10	31	5	410.807	1.451	3.448	0.670
2017	10	31	6	410.309	1.252	3.278	0.541
2017	10	31	7	409.807	0.981	3.148	0.440
2017	10	31	8	408.802	0.907	2.260	0.397
2017	10	31	9	408.233	1.101	1.460	0.434
2017	10	31	10	407.046	1.004	0.764	0.040
2017	10	31	11	405.355	0.500	-0.408	0.025
2017	10	31	12	404.802	0.351	-0.813	0.026
2017	10	31	13	404.545	0.211	-0.933	0.029
2017	10	31	14	404.820	0.187	-0.638	0.033
2017	10	31	15	405.136	0.210	-0.354	0.042
2017	10	31	16	405.548	0.296	-0.049	0.063
2017	10	31	17	407.017	0.446	0.773	0.560
2017	10	31	18	408.400	0.369	2.105	0.688
2017	10	31	19	409.535	0.414	2.559	1.324
2017	10	31	20	410.348	0.629	2.969	1.512
2017	10	31	21	410.640	0.700	3.173	1.529
2017	10	31	22	410.529	0.742	3.094	1.455
2017	10	31	23	410.344	0.745	2.978	1.383
2017	11	1	0	414.597	0.438	2.944	0.961	OK
2017	11	1	1	414.496	0.426	2.861	0.487
2017	11	1	2	414.566	0.389	3.010	0.233
2017	11	1	3	414.654	0.391	3.111	0.121
2017	11	1	4	414.671	0.382	3.138	0.083
2017	11	1	5	414.576	0.308	3.132	0.055
2017	11	1	6	414.394	0.246	3.027	0.037
2017	11	1	7	414.166	0.262	2.805	0.011
2017	11	1	8	413.548	0.334	2.119	0.006
2017	11	1	9	413.443	0.448	1.903	0.003
2017	11	1	10	414.263	1.295	1.879	0.000
2017	11	1	11	414.904	2.818	0.997	0.000
2017	11	1	12	415.865	4.418	0.358	0.000
2017	11	1	13	416.246	4.930	0.227	0.000
2017	11	1	14	416.287	5.026	0.172	0.000
2017	11	1	15	416.068	4.833	0.146	0.000
2017	11	1	16	417.533	6.136	0.306	0.004
2017	11	1	17	418.755	6.037	1.624	0.008
2017	11	1	18	417.391	2.679	3.613	0.014
2017	11	1	19	415.339	0.862	3.375	0.019
2017	11	1	20	414.824	0.632	3.088	0.023
2017	11	1	21	414.810	0.791	2.901	0.047
2017	11	1	22	414.929	0.963	2.822	0.132
2017	11	1	23	415.674	1.219	3.289	0.215
2017	11	2	0	416.936	1.622	4.120	0.344
2017	11	2	1	418.683	2.077	5.347	0.567
2017	11	2	2	419.498	2.441	5.756	0.644
2017	11	2	3	419.606	2.502	5.693	0.785
2017	11	2	4	419.610	2.269	5.694	1.000
2017	11	2	5	419.011	1.533	5.840	1.050
2017	11	2	6	418.643	0.974	6.229	1.003
2017	11	2	7	418.809	0.437	7.244	0.270
2017	11	2	8	417.269	0.207	5.987	0.046
2017	11	2	9	413.662	0.136	2.443	0.023
2017	11	2	10	412.207	0.279	0.836	0.003
2017	11	2	11	412.319	0.440	0.788	0.002
2017	11	2	12	412.448	0.519	0.839	0.001
2017	11	2	13	412.599	0.582	0.927	0.001
2017	11	2	14	412.824	0.649	1.085	0.001
2017	11	2	15	413.004	0.683	1.230	0.002
2017	11	2	16	413.184	0.691	1.400	0.004
2017	11	2	17	413.971	0.672	2.201	0.006
2017	11	2	18	415.483	0.652	3.732	0.006
2017	11	2	19	418.075	0.607	6.372	0.004
2017	11	2	20	418.551	0.520	6.938	0.002
2017	11	2	21	417.891	0.402	6.397	0.002
2017	11	2	22	417.383	0.249	6.043	0.001
2017	11	2	23	417.189	0.065	6.033	0.002
2017	11	3	0	417.095	0.038	5.966	0.002
2017	11	3	1	417.017	0.009	5.917	0.002
2017	11	3	2	416.777	0.004	5.682	0.002
2017	11	3	3	416.689	0.005	5.593	0.002
2017	11	3	4	417.352	0.009	6.250	0.004
2017	11	3	5	418.362	0.015	7.252	0.006
2017	11	3	6	419.149	0.023	8.027	0.010
2017	11	3	7	418.984	0.021	7.864	0.010
2017	11	3	8	417.586	0.009	6.482	0.007
2017	11	3	9	412.770	0.009	1.665	0.008
2017	11	3	10	411.752	0.167	0.445	0.035
2017	11	3	11	411.657	0.127	0.405	0.039
2017	11	3	12	411.621	0.072	0.442	0.028
2017	11	3	13	411.552	0.076	0.369	0.035
2017	11	3	14	411.525	0.108	0.307	0.035
2017	11	3	15	411.457	0.130	0.216	0.038
2017	11	3	16	412.167	0.291	0.739	0.103
2017	11	3	17	414.997	0.499	3.925	0.488
2017	11	3	18	418.251	1.153	5.942	1.401
2017	11	3	19	419.538	2.140	5.592	0.618
2017	11	3	20	419.117	1.979	5.446	0.390
2017	11	3	21	419.014	1.977	5.375	0.471
2017	11	3	22	418.868	1.814	5.490	0.465
2017	11	3	23	418.781	1.639	5.646	0.484
2017	11	4	0	418.258	1.269	5.680	0.372
2017	11	4	1	417.148	1.242	4.755	0.209
2017	11	4	2	417.425	1.623	4.660	0.207
2017	11	4	3	417.943	2.074	4.730	0.223
2017	11	4	4	418.440	2.206	5.048	0.411
2017	11	4	5	418.600	1.757	5.573	0.595
2017	11	4	6	419.817	1.674	6.680	0.867
2017	11	4	7	420.018	1.683	6.660	0.984
2017	11	4	8	418.839	1.622	5.521	0.976
2017	11	4	9	417.328	1.704	3.987	1.049
2017	11	4	10	415.500	1.688	2.470	0.245
2017	11	4	11	414.138	1.412	1.461	0.173
2017	11	4	12	413.499	1.324	0.956	0.128
2017	11	4	13	412.712	0.994	0.550	0.078
2017	11	4	14	412.350	0.771	0.427	0.064
2017	11	4	15	412.402	0.691	0.562	0.060
2017	11	4	16	412.684	0.760	0.711	0.122
2017	11	4	17	414.808	0.917	2.526	0.936
2017	11	4	18	416.968	0.864	4.749	0.760
2017	11	4	19	417.100	0.733	4.941	0.611
2017	11	4	20	417.063	0.698	4.896	0.595
2017	11	4	21	416.696	0.714	4.453	0.651
2017	11	4	22	415.970	0.648	3.781	0.861
2017	11	4	23	415.377	0.719	3.096	0.893
2017	11	5	0	415.361	0.983	2.807	0.887
2017	11	5	1	415.243	1.099	2.623	0.831
2017	11	5	2	415.167	1.069	2.624	0.802
2017	11	5	3	414.924	0.974	2.487	0.773
2017	11	5	4	414.942	0.915	2.565	0.751
2017	11	5	5	415.048	0.852	2.741	0.758
2017	11	5	6	415.362	0.822	3.070	0.793
2017	11	5	7	415.753	0.996	3.252	1.004
2017	11	5	8	414.658	1.013	2.140	0.907
2017	11	5	9	413.341	1.130	0.876	0.797
2017	11	5	10	411.921	0.849	-0.193	0.172
2017	11	5	11	411.368	0.687	-0.498	0.089
2017	11	5	12	411.220	0.791	-0.743	0.081
2017	11	5	13	411.030	0.596	-0.726	0.070
2017	11	5	14	411.146	0.521	-0.535	0.070
2017	11	5	15	411.177	0.408	-0.391	0.069
2017	11	5	16	411.434	0.416	-0.153	0.079
2017	11	5	17	412.848	0.576	0.961	0.367
2017	11	5	18	413.636	0.533	1.796	0.360
2017	11	5	19	414.253	0.640	2.284	0.452
2017	11	5	20	414.719	0.651	2.752	0.433
2017	11	5	21	414.929	0.679	2.966	0.397
2017	11	5	22	414.826	0.679	2.940	0.295
2017	11	5	23	414.807	0.741	2.888	0.228
2017	11	6	0	414.781	0.776	2.848	0.139
2017	11	6	1	414.588	0.698	2.762	0.053
2017	11	6	2	414.307	0.569	2.617	0.040
2017	11	6	3	414.236	0.533	2.585	0.036
2017	11	6	4	414.346	0.548	2.685	0.029
2017	11	6	5	414.377	0.556	2.708	0.031
2017	11	6	6	414.406	0.563	2.728	0.034
2017	11	6	7	414.388	0.590	2.683	0.036
2017	11	6	8	413.819	0.646	2.062	0.028
2017	11	6	9	413.361	0.743	1.513	0.020
2017	11	6	10	412.724	1.125	0.501	0.016
2017	11	6	11	411.796	1.228	-0.523	0.003
2017	11	6	12	411.091	1.204	-1.204	0.002
2017	11	6	13	410.726	1.383	-1.747	0.002
2017	11	6	14	410.160	1.150	-2.081	0.002
2017	11	6	15	410.785	0.922	-1.229	0.003
2017	11	6	16	411.591	0.969	-0.482	0.032
2017	11	6	17	413.208	1.051	1.025	0.061
2017	11	6	18	415.449	1.074	3.223	0.092
2017	11	6	19	416.211	1.125	3.922	0.089
2017	11	6	20	416.591	1.162	4.277	0.074
2017	11	6	21	416.878	1.162	4.565	0.077
2017	11	6	22	417.033	1.129	4.750	0.091
2017	11	6	23	417.105	1.079	4.874	0.091
2017	11	7	0	417.135	1.047	4.934	0.094
2017	11	7	1	417.049	1.041	4.847	0.107
2017	11	7	2	416.978	1.020	4.791	0.121
2017	11	7	3	416.766	0.969	4.634	0.115
2017	11	7	4	416.325	0.908	4.267	0.094
2017	11	7	5	416.051	0.838	4.067	0.088
2017	11	7	6	415.817	0.785	3.891	0.080
2017	11	7	7	415.367	0.720	3.507	0.075
2017	11	7	8	414.594	0.678	2.770	0.082
2017	11	7	9	413.612	0.727	1.726	0.109
2017	11	7	10	413.297	1.122	1.014	0.192
2017	11	7	11	412.645	1.337	0.197	0.025
2017	11	7	12	411.881	1.239	-0.457	0.011
2017	11	7	13	411.553	1.365	-0.905	0.005
2017	11	7	14	411.277	1.660	-1.475	0.003
2017	11	7	15	411.329	1.938	-1.702	0.006
2017	11	7	16	412.192	1.815	-0.728	0.028
2017	11	7	17	415.529	1.655	2.735	0.059
2017	11	7	18	420.973	1.563	8.244	0.078
2017	11	7	19	418.964	1.420	6.400	0.054
2017	11	7	20	418.173	1.446	5.610	0.031
2017	11	7	21	418.149	1.470	5.563	0.030
2017	11	7	22	417.762	1.271	5.350	0.060
2017	11	7	23	417.374	0.957	5.213	0.134
2017	11	8	0	417.402	0.992	5.119	0.224
2017	11	8	1	418.063	1.125	5.571	0.319
2017	11	8	2	418.671	1.146	6.148	0.385
2017	11	8	3	418.360	1.044	5.994	0.392
2017	11	8	4	417.722	1.002	5.368	0.376
2017	11	8	5	417.841	1.245	5.170	0.409
2017	11	8	6	418.086	1.341	5.344	0.439
2017	11	8	7	417.878	1.055	5.595	0.245
2017	11	8	8	416.529	1.037	4.325	0.140
2017	11	8	9	414.874	1.230	2.517	0.061
2017	11	8	10	414.619	1.545	1.971	0.032
2017	11	8	11	413.103	1.859	0.151	0.005
2017	11	8	12	412.485	2.202	-0.809	0.003
2017	11	8	13	412.458	2.414	-1.046	0.001
2017	11	8	14	413.040	2.132	-0.182	0.001
2017	11	8	15	413.527	1.941	0.495	0.003
2017	11	8	16	414.077	1.843	1.141	0.019
2017	11	8	17	416.306	1.890	3.315	0.039
2017	11	8	18	421.959	1.638	9.209	0.090
2017	11	8	19	422.405	2.065	9.198	0.411
2017	11	8	20	419.997	2.262	6.587	0.679
2017	11	8	21	419.557	1.996	6.398	0.979
2017	11	8	22	420.897	1.818	7.769	1.165
2017	11	8	23	421.596	1.917	8.295	1.224
2017	11	9	0	421.730	1.990	8.177	1.303
2017	11	9	1	419.432	1.862	6.075	1.375
2017	11	9	2	417.933	1.822	4.642	1.377
2017	11	9	3	417.551	1.714	4.299	1.290
2017	11	9	4	417.619	1.636	4.414	1.255
2017	11	9	5	417.763	1.540	4.670	1.214
2017	11	9	6	417.623	1.454	4.643	1.272
2017	11	9	7	417.245	1.608	4.136	1.396
2017	11	9	8	416.330	2.142	2.680	1.405
2017	11	9	9	415.768	2.778	1.600	0.278
2017	11	9	10	413.018	1.504	0.289	0.132
2017	11	9	11	411.264	0.679	-0.606	0.099
2017	11	9	12	410.822	0.464	-0.827	0.094
2017	11	9	13	410.966	0.414	-0.635	0.096
2017	11	9	14	411.367	0.423	-0.248	0.100
2017	11	9	15	411.608	0.470	-0.070	0.116
2017	11	9	16	412.071	0.613	0.198	0.165
2017	11	9	17	414.002	1.387	0.904	0.820
2017	11	9	18	414.954	1.376	1.946	0.995
2017	11	9	19	415.240	1.328	2.421	1.188
2017	11	9	20	415.381	1.203	2.727	1.203
2017	11	9	21	415.212	0.976	2.883	1.311
2017	11	9	22	414.902	0.822	2.793	1.352
2017	11	9	23	414.774	0.771	2.704	1.318
2017	11	10	0	414.823	0.783	2.693	1.279
2017	11	10	1	414.913	0.859	2.636	1.208
2017	11	10	2	414.996	0.891	2.638	1.170
2017	11	10	3	415.063	0.935	2.618	1.108
2017	11	10	4	415.135	0.946	2.669	1.059
2017	11	10	5	415.117	0.923	2.673	1.044
2017	11	10	6	415.068	0.932	2.602	0.990
2017	11	10	7	415.048	1.123	2.311	0.749
2017	11	10	8	414.472	1.326	1.469	0.621
2017	11	10	9	413.504	1.128	0.810	0.772
2017	11	10	10	412.477	0.908	0.343	0.138
2017	11	10	11	411.908	0.784	0.026	0.009
2017	11	10	12	411.732	0.896	-0.255	0.002
2017	11	10	13	411.474	0.839	-0.455	0.001
2017	11	10	14	411.113	0.719	-0.695	0.000
2017	11	10	15	411.875	1.060	-0.274	0.000
2017	11	10	16	413.103	1.770	0.244	0.000
2017	11	10	17	414.130	2.405	0.635	0.001
2017	11	10	18	416.321	2.730	2.501	0.001
2017	11	10	19	418.782	3.190	4.503	0.000
2017	11	10	20	420.506	3.722	5.695	0.000
2017	11	10	21	422.225	4.596	6.540	0.000
2017	11	10	22	422.219	4.501	6.629	0.000
2017	11	10	23	420.763	4.559	5.114	0.001
2017	11	11	0	421.495	5.040	5.365	0.001
2017	11	11	1	420.184	4.030	5.063	0.002
2017	11	11	2	419.155	1.878	6.185	0.003
2017	11	11	3	418.611	0.871	6.647	0.004
2017	11	11	4	414.888	0.642	3.149	0.008
2017	11	11	5	414.981	0.981	2.897	0.016
2017	11	11	6	414.998	1.378	2.477	0.085
2017	11	11	7	414.912	1.066	2.545	0.593
2017	11	11	8	415.040	0.873	2.818	0.724
2017	11	11	9	413.084	0.675	1.213	0.101
2017	11	11	10	411.388	0.253	0.012	0.032
2017	11	11	11	410.871	0.173	-0.417	0.025
2017	11	11	12	410.923	0.161	-0.353	0.025
2017	11	11	13	411.087	0.183	-0.217	0.030
2017	11	11	14	411.250	0.185	-0.060	0.035
2017	11	11	15	411.441	0.211	0.097	0.043
2017	11	11	16	411.774	0.319	0.296	0.067
2017	11	11	17	412.918	0.675	0.900	0.528
2017	11	11	18	414.047	0.933	1.671	0.752
2017	11	11	19	415.168	1.375	2.209	0.770
2017	11	11	20	415.775	1.449	2.729	0.783
2017	11	11	21	415.853	1.368	2.957	0.860
2017	11	11	22	416.650	1.573	3.550	1.020
2017	11	11	23	417.025	1.639	3.870	1.076
2017	11	12	0	417.315	1.688	4.072	1.084
2017	11	12	1	417.108	1.441	4.229	0.996
2017	11	12	2	416.822	1.325	4.084	0.890
2017	11	12	3	416.699	1.400	3.790	0.953
2017	11	12	4	416.538	1.596	3.317	0.972
2017	11	12	5	416.351	1.605	3.123	0.940
2017	11	12	6	416.185	1.589	3.023	0.964
2017	11	12	7	415.861	1.542	2.775	0.950
2017	11	12	8	415.053	1.584	1.915	0.930
2017	11	12	9	414.068	1.645	0.949	1.029
2017	11	12	10	413.065	1.602	0.199	0.170
2017	11	12	11	411.897	1.047	-0.337	0.097
2017	11	12	12	411.482	0.904	-0.607	0.094
2017	11	12	13	411.230	0.675	-0.641	0.105
2017	11	12	14	411.471	0.630	-0.361	0.111
2017	11	12	15	411.716	0.669	-0.187	0.144
2017	11	12	16	412.305	0.864	0.114	0.233
2017	11	12	17	413.784	0.991	1.253	1.061
2017	11	12	18	414.598	1.031	2.017	1.036
2017	11	12	19	414.820	0.954	2.455	1.202
2017	11	12	20	415.139	0.865	2.939	1.264
2017	11	12	21	415.334	0.873	3.054	1.195
2017	11	12	22	415.549	0.961	3.084	0.896
2017	11	12	23	415.440	0.893	3.081	0.727
2017	11	13	0	415.222	0.794	3.014	0.662
2017	11	13	1	415.022	0.772	2.844	0.699
2017	11	13	2	414.941	0.775	2.765	0.720
2017	11	13	3	415.057	0.843	2.780	0.771
2017	11	13	4	415.260	0.920	2.868	0.747
2017	11	13	5	415.379	0.895	3.022	0.718
2017	11	13	6	415.495	0.887	3.139	0.716
2017	11	13	7	414.936	0.652	2.917	0.771
2017	11	13	8	414.172	0.749	2.011	0.696
2017	11	13	9	413.196	0.857	0.902	0.609
2017	11	13	10	412.105	0.904	-0.054	0.174
2017	11	13	11	411.457	0.869	-0.570	0.069
2017	11	13	12	411.414	0.693	-0.386	0.018
2017	11	13	13	411.439	0.771	-0.422	0.001
2017	11	13	14	411.299	0.697	-0.487	0.000
2017	11	13	15	411.849	0.888	-0.128	0.000
2017	11	13	16	413.395	2.072	0.234	0.000
2017	11	13	17	414.298	2.681	0.527	0.001
2017	11	13	18	414.707	2.514	1.103	0.001
2017	11	13	19	416.112	2.108	2.914	0.001
2017	11	13	20	419.608	2.740	5.778	0.001
2017	11	13	21	420.958	4.034	5.834	0.001
2017	11	13	22	420.886	5.867	3.929	0.001
2017	11	13	23	420.742	6.644	3.007	0.002
2017	11	14	0	419.997	5.974	2.931	0.003
2017	11	14	1	418.125	4.070	2.961	0.005
2017	11	14	2	416.272	2.114	3.062	0.008
2017	11	14	3	415.383	1.184	3.102	0.010
2017	11	14	4	415.014	0.820	3.097	0.011
2017	11	14	5	414.939	0.784	3.058	0.011
2017	11	14	6	415.237	0.886	3.254	0.011
2017	11	14	7	415.397	1.008	3.294	0.008
2017	11	14	8	415.886	1.113	3.679	0.006
2017	11	14	9	416.001	1.257	3.652	0.005
2017	11	14	10	415.621	1.262	3.268	0.003
2017	11	14	11	415.112	1.362	2.659	0.003
2017	11	14	12	414.500	1.742	1.666	0.003
2017	11	14	13	413.249	1.624	0.525	0.011
2017	11	14	14	412.726	1.335	0.272	0.030
2017	11	14	15	413.437	1.628	0.638	0.091
2017	11	14	16	414.649	1.899	1.578	0.439
2017	11	14	17	416.531	1.719	3.601	0.531
2017	11	14	18	417.330	1.740	4.385	0.451
2017	11	14	19	418.370	2.067	5.091	0.483
2017	11	14	20	419.610	2.416	5.885	0.684
2017	11	14	21	419.993	2.294	6.128	1.115
2017	11	14	22	418.142	1.758	4.722	1.210
2017	11	14	23	417.150	1.639	3.806	1.140
2017	11	15	0	416.843	1.648	3.459	1.054
2017	11	15	1	416.700	1.580	3.479	1.080
2017	11	15	2	416.503	1.478	3.434	1.102
2017	11	15	3	416.510	1.579	3.215	1.032
2017	11	15	4	416.272	1.595	2.866	0.745
2017	11	15	5	416.050	1.527	2.719	0.682
2017	11	15	6	415.948	1.485	2.664	0.705
2017	11	15	7	415.828	1.420	2.634	0.737
2017	11	15	8	414.943	1.402	1.777	0.789
2017	11	15	9	413.458	1.272	0.602	0.925
2017	11	15	10	412.530	1.167	0.052	0.219
2017	11	15	11	411.798	0.831	-0.242	0.120
2017	11	15	12	411.435	0.543	-0.214	0.017
2017	11	15	13	411.326	0.613	-0.377	0.001
2017	11	15	14	411.447	0.676	-0.319	0.001
2017	11	15	15	411.627	0.763	-0.226	0.001
2017	11	15	16	412.465	0.961	0.393	0.021
2017	11	15	17	414.692	1.253	2.155	0.212
2017	11	15	18	416.083	1.302	3.395	0.287
2017	11	15	19	416.663	1.839	3.131	0.680
2017	11	15	20	417.313	2.192	3.331	0.717
2017	11	15	21	417.156	2.079	3.283	0.862
2017	11	15	22	416.851	1.924	3.140	0.977
2017	11	15	23	416.629	1.870	2.975	1.006
2017	11	16	0	416.480	1.817	2.823	0.964
2017	11	16	1	416.332	1.699	2.760	0.893
2017	11	16	2	416.169	1.489	2.861	0.948
2017	11	16	3	415.712	1.157	2.855	1.053
2017	11	16	4	415.305	1.003	2.698	1.003
2017	11	16	5	414.951	0.884	2.540	0.846
2017	11	16	6	415.084	1.021	2.462	0.856
2017	11	16	7	415.183	1.166	2.245	0.930
2017	11	16	8	414.376	1.094	1.461	0.942
2017	11	16	9	413.583	1.178	0.588	0.840
2017	11	16	10	411.890	0.704	-0.041	0.133
2017	11	16	11	411.698	0.710	-0.184	0.081
2017	11	16	12	411.520	0.599	-0.246	0.076
2017	11	16	13	411.623	0.529	-0.083	0.087
2017	11	16	14	411.727	0.468	0.069	0.099
2017	11	16	15	411.853	0.488	0.163	0.110
2017	11	16	16	412.044	0.539	0.280	0.132
2017	11	16	17	413.927	1.190	1.080	0.953
2017	11	16	18	414.821	1.134	2.107	1.067
2017	11	16	19	415.433	1.437	2.373	0.982
2017	11	16	20	415.804	1.629	2.496	0.878
2017	11	16	21	416.020	1.769	2.509	0.750
2017	11	16	22	415.908	1.698	2.510	0.609
2017	11	16	23	415.657	1.592	2.425	0.539
2017	11	17	0	415.613	1.598	2.398	0.473
2017	11	17	1	415.649	1.598	2.425	0.449
2017	11	17	2	415.515	1.512	2.397	0.443
2017	11	17	3	415.491	1.519	2.348	0.487
2017	11	17	4	415.614	1.612	2.320	0.510
2017	11	17	5	415.675	1.613	2.361	0.497
2017	11	17	6	415.724	1.609	2.409	0.514
2017	11	17	7	415.712	1.622	2.402	0.504
2017	11	17	8	415.114	1.635	1.799	0.457
2017	11	17	9	414.243	1.612	0.946	0.545
2017	11	17	10	413.012	1.299	0.449	0.157
2017	11	17	11	411.911	0.695	0.066	0.061
2017	11	17	12	411.613	0.590	-0.102	0.035
2017	11	17	13	411.664	0.599	-0.048	0.024
2017	11	17	14	411.613	0.470	0.028	0.026
2017	11	17	15	411.693	0.466	0.105	0.033
2017	11	17	16	412.418	0.765	0.360	0.252
2017	11	17	17	414.327	1.167	1.596	0.497
2017	11	17	18	415.069	1.350	2.175	0.219
2017	11	17	19	414.152	0.508	2.398	0.018
2017	11	17	20	414.128	0.217	2.784	0.011
2017	11	17	21	414.196	0.226	2.874	0.004
2017	11	17	22	413.579	0.476	2.013	0.001
2017	11	17	23	415.804	1.311	3.404	0.001
2017	11	18	0	417.952	2.985	3.878	0.000
2017	11	18	1	418.997	3.502	4.406	0.000
2017	11	18	2	418.968	3.518	4.361	0.000
2017	11	18	3	418.836	3.388	4.359	0.001
2017	11	18	4	418.433	2.950	4.393	0.001
2017	11	18	5	417.855	2.538	4.227	0.001
2017	11	18	6	417.757	2.508	4.159	0.001
2017	11	18	7	417.397	3.485	2.820	0.003
2017	11	18	8	417.208	4.277	1.836	0.005
2017	11	18	9	413.181	0.923	1.152	0.016
2017	11	18	10	412.503	0.852	0.460	0.099
2017	11	18	11	413.302	1.503	0.609	0.094
2017	11	18	12	412.962	1.346	0.422	0.104
2017	11	18	13	412.782	1.064	0.436	0.188
2017	11	18	14	412.667	0.903	0.448	0.221
2017	11	18	15	412.907	0.946	0.539	0.356
2017	11	18	16	414.054	1.341	0.934	1.071
2017	11	18	17	415.420	1.737	1.769	0.806
2017	11	18	18	416.118	2.038	2.120	0.673
2017	11	18	19	416.026	1.828	2.232	0.560
2017	11	18	20	415.768	1.596	2.217	0.506
2017	11	18	21	415.826	1.625	2.233	0.580
2017	11	18	22	415.567	1.533	2.117	0.811
2017	11	18	23	415.314	1.436	1.991	0.866
2017	11	19	0	414.549	0.990	1.960	1.263
2017	11	19	1	414.038	0.537	2.276	1.643
2017	11	19	2	414.389	0.616	2.494	1.572
2017	11	19	3	414.552	0.775	2.447	1.521
2017	11	19	4	415.577	1.686	2.028	0.919
2017	11	19	5	415.883	1.946	2.068	0.872
2017	11	19	6	416.290	2.281	2.096	0.844
2017	11	19	7	416.415	2.496	2.074	0.929
2017	11	19	8	416.281	2.696	1.778	0.988
2017	11	19	9	415.527	2.671	1.383	0.718
2017	11	19	10	413.482	1.699	0.541	0.149
2017	11	19	11	412.111	1.006	-0.095	0.109
2017	11	19	12	411.858	0.697	-0.017	0.087
2017	11	19	13	411.537	0.377	0.023	0.047
2017	11	19	14	411.546	0.361	0.050	0.045
2017	11	19	15	411.693	0.426	0.117	0.059
2017	11	19	16	412.037	0.607	0.235	0.101
2017	11	19	17	413.483	1.134	0.786	0.637
2017	11	19	18	413.639	0.894	1.241	0.664
2017	11	19	19	413.652	0.866	1.412	0.716
2017	11	19	20	414.207	1.056	1.767	0.707
2017	11	19	21	413.769	0.717	1.778	0.636
2017	11	19	22	413.881	0.831	1.692	0.796
2017	11	19	23	414.120	1.021	1.648	0.792
2017	11	20	0	414.301	1.038	1.762	0.884
2017	11	20	1	414.271	0.934	1.869	0.891
2017	11	20	2	414.429	0.950	1.998	0.894
2017	11	20	3	414.916	1.177	2.129	0.900
2017	11	20	4	415.278	1.373	2.191	0.806
2017	11	20	5	415.271	1.396	2.149	0.797
2017	11	20	6	415.168	1.343	2.138	0.735
2017	11	20	7	415.036	1.259	2.164	0.608
2017	11	20	8	414.481	1.185	1.742	0.591
2017	11	20	9	413.939	1.237	1.191	0.562
2017	11	20	10	413.298	1.272	0.747	0.338
2017	11	20	11	411.997	0.608	0.251	0.048
2017	11	20	12	411.671	0.541	-0.006	0.046
2017	11	20	13	411.963	0.758	0.021	0.094
2017	11	20	14	411.975	0.710	0.067	0.108
2017	11	20	15	412.183	0.751	0.182	0.159
2017	11	20	16	413.684	1.346	0.652	0.473
2017	11	20	17	414.543	1.101	1.883	0.319
2017	11	20	18	414.938	0.929	2.540	0.277
2017	11	20	19	415.125	0.726	3.008	0.378
2017	11	20	20	415.103	0.663	3.136	0.218
2017	11	20	21	415.109	0.696	3.140	0.152
2017	11	20	22	415.361	0.651	3.501	0.069
2017	11	20	23	414.921	0.766	2.947	0.078
2017	11	21	0	416.291	2.085	2.271	0.792
2017	11	21	1	414.510	1.284	1.708	0.964
2017	11	21	2	413.844	0.941	1.437	0.889
2017	11	21	3	413.403	0.682	1.271	0.699
2017	11	21	4	413.390	0.562	1.368	0.734
2017	11	21	5	413.442	0.492	1.514	0.780
2017	11	21	6	413.563	0.511	1.597	0.969
2017	11	21	7	413.821	0.594	1.730	1.041
2017	11	21	8	413.445	0.679	1.255	1.019
2017	11	21	9	412.930	0.925	0.499	1.160
2017	11	21	10	412.423	1.262	-0.176	0.242
2017	11	21	11	411.681	1.006	-0.573	0.157
2017	11	21	12	411.532	0.976	-0.669	0.134
2017	11	21	13	411.500	0.872	-0.579	0.117
2017	11	21	14	411.833	0.878	-0.250	0.115
2017	11	21	15	412.151	1.002	-0.092	0.149
2017	11	21	16	412.753	1.163	0.187	1.012
2017	11	21	17	413.653	1.139	0.983	1.114
2017	11	21	18	414.263	1.322	1.282	1.021
2017	11	21	19	414.421	1.191	1.658	1.068
2017	11	21	20	414.521	1.054	1.984	1.099
2017	11	21	21	414.686	1.007	2.168	1.058
2017	11	21	22	415.057	1.216	2.172	0.782
2017	11	21	23	414.740	1.207	1.969	0.438
2017	11	22	0	414.411	1.005	1.938	0.334
2017	11	22	1	414.156	0.723	2.085	0.248
2017	11	22	2	413.864	0.433	2.196	0.159
2017	11	22	3	413.619	0.238	2.220	0.077
2017	11	22	4	413.574	0.148	2.317	0.019
2017	11	22	5	413.577	0.244	2.233	0.010
2017	11	22	6	413.542	0.519	1.929	0.005
2017	11	22	7	413.409	0.899	1.419	0.002
2017	11	22	8	413.788	1.681	1.016	0.002
2017	11	22	9	414.743	2.783	0.869	0.002
2017	11	22	10	415.270	3.264	0.916	0.001
2017	11	22	11	416.279	4.398	0.792	0.000
2017	11	22	12	415.942	4.378	0.475	0.000
2017	11	22	13	415.073	3.643	0.341	0.000
2017	11	22	14	414.688	3.286	0.313	0.000
2017	11	22	15	414.458	3.068	0.301	0.000
2017	11	22	16	414.305	2.869	0.347	0.000
2017	11	22	17	414.261	2.736	0.436	0.000
2017	11	22	18	414.136	2.487	0.560	0.000
2017	11	22	19	414.660	2.576	0.995	0.000
2017	11	22	20	416.213	3.253	1.871	0.000
2017	11	22	21	418.289	4.056	3.144	0.000
2017	11	22	22	422.110	5.873	5.147	0.001
2017	11	22	23	422.739	6.526	5.123	0.001
2017	11	23	0	421.683	6.659	3.933	0.002
2017	11	23	1	419.588	5.881	2.613	0.005
2017	11	23	2	416.835	2.971	2.767	0.008
2017	11	23	3	415.381	1.227	3.054	0.012
2017	11	23	4	415.433	0.595	3.698	0.054
2017	11	23	5	415.577	0.660	3.691	0.134
2017	11	23	6	415.767	0.830	3.664	0.194
2017	11	23	7	416.829	1.322	4.073	0.533
2017	11	23	8	416.652	1.929	3.115	0.776
2017	11	23	9	415.744	2.022	2.084	0.972
2017	11	23	10	414.213	1.548	1.425	0.905
2017	11	23	11	413.634	1.567	0.779	0.209
2017	11	23	12	412.618	1.133	0.285	0.110
2017	11	23	13	412.387	1.023	0.115	0.157
2017	11	23	14	412.507	0.951	0.259	0.209
2017	11	23	15	413.035	1.180	0.524	0.744
2017	11	23	16	414.567	1.594	1.192	0.950
2017	11	23	17	415.267	1.680	1.794	0.775
2017	11	23	18	415.288	1.493	2.004	0.587
2017	11	23	19	415.208	1.385	2.024	0.595
2017	11	23	20	414.822	1.078	1.946	0.644
2017	11	23	21	414.465	0.932	1.762	0.606
2017	11	23	22	414.560	1.001	1.796	0.778
2017	11	23	23	414.640	1.105	1.771	0.790
2017	11	24	0	415.271	1.581	1.800	0.810
2017	11	24	1	415.668	1.937	1.844	0.569
2017	11	24	2	415.563	1.894	1.846	0.526
2017	11	24	3	415.535	1.879	1.875	0.425
2017	11	24	4	415.482	1.815	1.898	0.348
2017	11	24	5	414.990	1.381	1.878	0.317
2017	11	24	6	414.825	1.281	1.860	0.245
2017	11	24	7	414.942	1.276	1.971	0.298
2017	11	24	8	414.506	1.275	1.532	0.344
2017	11	24	9	414.050	1.329	0.907	0.600
2017	11	24	10	412.535	0.855	0.336	0.202
2017	11	24	11	411.950	0.577	0.094	0.187
2017	11	24	12	411.423	0.510	-0.340	0.162
2017	11	24	13	411.348	0.469	-0.349	0.137
2017	11	24	14	411.692	0.527	-0.075	0.149
2017	11	24	15	412.140	0.708	0.152	0.186
2017	11	24	16	413.731	1.481	0.569	0.428
2017	11	24	17	414.035	0.981	1.578	0.287
2017	11	24	18	413.872	0.619	1.961	0.184
2017	11	24	19	413.261	0.347	1.793	0.034
2017	11	24	20	413.079	0.382	1.593	0.016
2017	11	24	21	413.338	0.420	1.809	0.020
2017	11	24	22	413.838	0.440	2.278	0.027
2017	11	24	23	413.820	0.394	2.299	0.033
2017	11	25	0	413.804	0.343	2.323	0.045
2017	11	25	1	413.826	0.388	2.263	0.090
2017	11	25	2	414.057	0.565	2.249	0.152
2017	11	25	3	414.255	0.725	2.241	0.198
2017	11	25	4	414.806	1.157	2.156	0.419
2017	11	25	5	415.018	1.345	2.074	0.480
2017	11	25	6	415.209	1.419	2.079	0.545
2017	11	25	7	414.973	1.254	2.006	0.527
2017	11	25	8	414.635	1.284	1.626	0.574
2017	11	25	9	413.785	1.181	1.005	0.540
2017	11	25	10	412.560	0.840	0.525	0.103
2017	11	25	11	412.057	0.688	0.217	0.061
2017	11	25	12	411.687	0.580	-0.035	0.052
2017	11	25	13	411.564	0.452	-0.017	0.040
2017	11	25	14	411.634	0.457	0.049	0.039
2017	11	25	15	411.802	0.526	0.142	0.044
2017	11	25	16	412.378	0.804	0.338	0.186
2017	11	25	17	413.164	0.822	1.058	0.347
2017	11	25	18	413.661	0.898	1.423	0.319
2017	11	25	19	414.070	0.883	1.856	0.203
2017	11	25	20	413.829	0.519	2.089	0.119
2017	11	25	21	413.397	0.302	1.973	0.031
2017	11	25	22	412.984	0.533	1.356	0.006
2017	11	25	23	413.065	0.570	1.402	0.003
2017	11	26	0	413.321	0.755	1.475	0.002
2017	11	26	1	413.702	1.313	1.299	0.001
2017	11	26	2	414.489	2.153	1.246	0.001
2017	11	26	3	415.130	2.774	1.266	0.001
2017	11	26	4	414.669	2.437	1.142	0.001
2017	11	26	5	414.180	1.937	1.153	0.001
2017	11	26	6	413.344	1.106	1.147	0.001
2017	11	26	7	412.728	0.456	1.178	0.004
2017	11	26	8	412.372	0.315	0.959	0.008
2017	11	26	9	412.376	0.565	0.697	0.028
2017	11	26	10	412.675	0.979	0.483	0.249
2017	11	26	11	412.627	1.220	0.212	0.104
2017	11	26	12	412.752	1.268	0.273	0.120
2017	11	26	13	412.665	1.093	0.319	0.160
2017	11	26	14	412.591	0.974	0.320	0.202
2017	11	26	15	412.973	1.092	0.453	0.363
2017	11	26	16	413.645	1.129	0.915	1.125
2017	11	26	17	414.623	1.159	1.823	1.059
2017	11	26	18	414.984	1.266	2.072	1.049
2017	11	26	19	414.719	1.158	1.984	1.055
2017	11	26	20	414.520	1.056	1.892	1.066
2017	11	26	21	414.451	0.946	1.835	0.948
2017	11	26	22	414.836	1.121	1.964	0.713
2017	11	26	23	415.029	1.090	2.229	0.770
2017	11	27	0	415.009	0.971	2.423	0.827
2017	11	27	1	415.009	0.948	2.539	0.956
2017	11	27	2	414.969	0.910	2.556	0.895
2017	11	27	3	414.843	0.930	2.392	0.868
2017	11	27	4	414.164	0.758	1.968	0.892
2017	11	27	5	414.070	0.741	1.916	0.891
2017	11	27	6	414.161	0.844	1.894	0.987
2017	11	27	7	414.254	0.974	1.852	1.039
2017	11	27	8	413.863	1.050	1.365	1.029
2017	11	27	9	413.198	1.125	0.605	1.037
2017	11	27	10	412.990	1.622	-0.057	0.357
2017	11	27	11	411.964	1.339	-0.619	0.152
2017	11	27	12	411.350	0.912	-0.781	0.129
2017	11	27	13	411.375	0.916	-0.819	0.185
2017	11	27	14	411.575	0.832	-0.548	0.199
2017	11	27	15	412.076	0.984	-0.285	0.282
2017	11	27	16	412.402	0.766	0.251	0.995
2017	11	27	17	414.002	0.748	1.866	0.747
2017	11	27	18	414.782	0.707	2.717	0.566
2017	11	27	19	414.409	0.373	2.824	0.129
2017	11	27	20	413.932	0.222	2.589	0.029
2017	11	27	21	413.721	0.193	2.418	0.018
2017	11	27	22	413.571	0.206	2.260	0.012
2017	11	27	23	413.616	0.361	2.155	0.009
2017	11	28	0	414.087	0.825	2.162	0.010
2017	11	28	1	414.896	1.626	2.167	0.013
2017	11	28	2	415.849	2.598	2.147	0.014
2017	11	28	3	416.028	2.707	2.215	0.017
2017	11	28	4	415.186	1.742	2.329	0.028
2017	11	28	5	414.462	0.864	2.470	0.043
2017	11	28	6	414.132	0.449	2.553	0.043
2017	11	28	7	414.163	0.378	2.674	0.019
2017	11	28	8	413.612	0.363	2.139	0.016
2017	11	28	9	412.657	0.378	1.172	0.014
2017	11	28	10	411.722	0.472	0.149	0.009
2017	11	28	11	411.609	0.634	-0.120	0.005
2017	11	28	12	411.563	0.832	-0.359	0.001
2017	11	28	13	411.407	1.111	-0.794	0.001
2017	11	28	14	411.492	1.408	-1.006	0.001
2017	11	28	15	412.047	1.928	-0.972	0.003
2017	11	28	16	414.037	2.745	0.199	0.003
2017	11	28	17	416.727	3.560	2.074	0.003
2017	11	28	18	418.327	4.263	2.973	0.002
2017	11	28	19	418.911	5.164	2.656	0.001
2017	11	28	20	419.656	6.016	2.550	0.001
2017	11	28	21	419.912	6.348	2.473	0.001
2017	11	28	22	420.935	7.524	2.318	0.003
2017	11	28	23	420.272	6.751	2.426	0.007
2017	11	29	0	416.722	3.037	2.584	0.016
2017	11	29	1	415.545	1.529	2.888	0.070
2017	11	29	2	415.263	1.139	2.971	0.142
2017	11	29	3	414.660	0.959	2.561	0.112
2017	11	29	4	414.004	0.931	1.949	0.069
2017	11	29	5	413.845	0.887	1.837	0.059
2017	11	29	6	413.863	0.962	1.788	0.038
2017	11	29	7	414.118	1.073	1.934	0.034
2017	11	29	8	414.263	1.284	1.862	0.040
2017	11	29	9	414.220	1.505	1.575	0.092
2017	11	29	10	414.582	2.093	1.365	0.389
2017	11	29	11	413.848	1.854	0.859	0.047
2017	11	29	12	412.407	1.016	0.260	0.041
2017	11	29	13	412.389	0.862	0.385	0.052
2017	11	29	14	412.401	0.784	0.460	0.067
2017	11	29	15	412.367	0.736	0.457	0.083
2017	11	29	16	413.033	1.024	0.643	0.324
2017	11	29	17	413.043	0.646	1.158	0.808
2017	11	29	18	413.500	0.814	1.423	0.959
2017	11	29	19	414.083	1.039	1.691	0.908
2017	11	29	20	414.143	0.966	1.820	0.933
2017	11	29	21	414.131	0.890	1.869	1.075
2017	11	29	22	414.121	0.748	2.012	1.239
2017	11	29	23	414.166	0.699	2.105	1.191
2017	11	30	0	414.444	0.782	2.225	1.174
2017	11	30	1	414.371	0.769	2.136	1.075
2017	11	30	2	414.350	0.766	2.112	1.038
2017	11	30	3	414.406	0.818	2.086	1.000
2017	11	30	4	414.254	0.817	1.933	1.011
2017	11	30	5	414.225	0.855	1.859	0.996
2017	11	30	6	414.173	0.854	1.837	1.041
2017	11	30	7	413.929	0.750	1.805	1.108
2017	11	30	8	413.420	0.739	1.322	1.125
2017	11	30	9	412.994	0.810	0.836	1.202
2017	11	30	10	413.238	1.383	0.451	1.093
2017	11	30	11	412.830	1.291	0.195	0.248
2017	11	30	12	412.422	1.051	0.092	0.186
2017	11	30	13	412.076	0.779	0.055	0.149
2017	11	30	14	411.975	0.631	0.113	0.139
2017	11	30	15	412.308	0.729	0.274	0.214
2017	11	30	16	413.091	0.891	0.740	0.757
2017	11	30	17	413.794	0.843	1.506	0.710
2017	11	30	18	414.283	1.023	1.785	0.705
2017	11	30	19	414.864	1.269	2.028	0.745
2017	11	30	20	414.932	1.274	2.065	0.779
2017	11	30	21	414.879	1.263	1.980	0.829
2017	11	30	22	414.861	1.330	1.800	0.831
2017	11	30	23	414.825	1.319	1.754	0.841
2018	1	1	0	418.486	3.055	1.714	0.004	OK
2018	1	1	1	418.769	2.515	2.524	0.017
2018	1	1	2	417.849	1.252	2.795	0.089
2018	1	1	3	417.597	0.974	2.725	0.185
2018	1	1	4	418.098	1.346	2.664	0.375
2018	1	1	5	418.370	1.468	2.687	0.502
2018	1	1	6	418.367	1.494	2.612	0.548
2018	1	1	7	418.668	1.320	2.670	0.965
2018	1	1	8	418.791	1.396	2.432	1.250
2018	1	1	9	418.498	1.601	1.835	1.349
2018	1	1	10	417.818	1.616	1.088	1.401
2018	1	1	11	415.843	1.363	0.577	0.190
2018	1	1	12	414.869	0.802	0.236	0.118
2018	1	1	13	414.691	0.627	0.253	0.098
2018	1	1	14	414.953	0.656	0.491	0.093
2018	1	1	15	414.792	0.568	0.399	0.112
2018	1	1	16	414.917	0.620	0.420	0.164
2018	1	1	17	416.975	1.170	1.150	0.942
2018	1	1	18	417.383	1.291	1.546	0.833
2018	1	1	19	416.980	0.898	1.714	0.655
2018	1	1	20	417.107	0.837	1.900	0.657
2018	1	1	21	417.374	0.859	2.104	0.698
2018	1	1	22	418.172	0.713	2.447	1.299
2018	1	1	23	418.389	0.551	2.672	1.453
2018	1	2	0	418.585	0.610	2.790	1.472
2018	1	2	1	418.534	0.728	2.710	1.383
2018	1	2	2	418.351	0.753	2.523	1.362
2018	1	2	3	418.279	0.743	2.453	1.370
2018	1	2	4	417.964	0.654	2.200	1.397
2018	1	2	5	417.850	0.695	2.017	1.425
2018	1	2	6	417.717	0.722	1.865	1.417
2018	1	2	7	418.072	1.290	1.759	1.310
2018	1	2	8	417.966	1.427	1.563	1.263
2018	1	2	9	417.660	1.428	1.195	1.324
2018	1	2	10	417.271	1.585	0.859	1.114
2018	1	2	11	415.400	1.049	0.496	0.142
2018	1	2	12	414.619	0.673	0.139	0.094
2018	1	2	13	414.090	0.396	-0.116	0.097
2018	1	2	14	414.132	0.358	-0.053	0.114
2018	1	2	15	414.306	0.400	0.070	0.123
2018	1	2	16	414.870	0.671	0.233	0.253
2018	1	2	17	417.196	0.904	0.717	1.862
2018	1	2	18	417.830	0.862	1.162	2.093
2018	1	2	19	417.900	1.416	1.271	1.500
2018	1	2	20	417.658	1.384	1.422	1.139
2018	1	2	21	417.732	1.370	1.564	1.085
2018	1	2	22	417.245	1.074	1.633	0.825
2018	1	2	23	416.795	0.844	1.584	0.654
2018	1	3	0	416.691	0.775	1.587	0.616
2018	1	3	1	417.047	0.939	1.857	0.538
2018	1	3	2	417.123	0.969	1.921	0.520
2018	1	3	3	417.257	0.988	2.017	0.539
2018	1	3	4	417.992	1.361	2.182	0.736
2018	1	3	5	417.732	1.177	2.186	0.656
2018	1	3	6	417.553	0.994	2.238	0.608
2018	1	3	7	417.119	0.839	2.021	0.546
2018	1	3	8	416.758	0.724	1.804	0.517
2018	1	3	9	416.060	0.655	1.229	0.463
2018	1	3	10	416.293	0.830	0.719	1.031
2018	1	3	11	415.012	0.977	0.017	0.305
2018	1	3	12	414.386	0.737	-0.368	0.304
2018	1	3	13	414.663	0.772	-0.124	0.302
2018	1	3	14	414.797	0.823	-0.036	0.297
2018	1	3	15	415.526	1.243	0.240	0.330
2018	1	3	16	417.632	1.858	0.588	1.473
2018	1	3	17	418.090	2.068	1.149	1.160
2018	1	3	18	418.065	1.988	1.318	1.046
2018	1	3	19	417.607	1.596	1.386	0.912
2018	1	3	20	417.588	1.604	1.334	0.937
2018	1	3	21	417.606	1.634	1.325	0.934
2018	1	3	22	417.734	1.593	1.301	1.127
2018	1	3	23	417.795	1.657	1.265	1.160
2018	1	4	0	417.838	1.709	1.278	1.138
2018	1	4	1	417.900	1.627	1.291	1.269
2018	1	4	2	417.892	1.568	1.290	1.321
2018	1	4	3	417.905	1.569	1.298	1.325
2018	1	4	4	417.984	1.675	1.288	1.308
2018	1	4	5	418.221	1.884	1.269	1.355
2018	1	4	6	418.256	1.922	1.266	1.355
2018	1	4	7	418.224	1.634	1.305	1.572
2018	1	4	8	418.012	1.514	1.174	1.611
2018	1	4	9	417.503	1.379	0.749	1.662
2018	1	4	10	416.973	1.109	0.289	1.862
2018	1	4	11	415.435	1.577	-0.188	0.333
2018	1	4	12	414.599	0.988	-0.332	0.230
2018	1	4	13	414.626	0.967	-0.253	0.199
2018	1	4	14	414.866	0.973	-0.009	0.189
2018	1	4	15	415.197	1.073	0.185	0.226
2018	1	4	16	415.745	1.320	0.377	0.335
2018	1	4	17	417.673	1.274	0.992	1.694
2018	1	4	18	418.092	1.408	1.376	1.595
2018	1	4	19	417.890	1.245	1.415	1.517
2018	1	4	20	417.387	1.179	1.225	1.270
2018	1	4	21	417.170	1.170	1.091	1.196
2018	1	4	22	417.114	1.381	1.078	0.942
2018	1	4	23	416.915	1.358	1.102	0.742
2018	1	5	0	416.882	1.355	1.103	0.711
2018	1	5	1	416.959	1.459	1.053	0.734
2018	1	5	2	417.066	1.537	1.018	0.798
2018	1	5	3	417.113	1.568	1.014	0.818
2018	1	5	4	417.243	1.307	1.037	1.186
2018	1	5	5	417.189	0.921	1.099	1.456
2018	1	5	6	417.092	0.748	1.124	1.507
2018	1	5	7	417.190	0.769	1.214	1.494
2018	1	5	8	417.234	0.887	1.206	1.428
2018	1	5	9	417.001	0.937	0.895	1.456
2018	1	5	10	416.676	1.163	0.540	1.260
2018	1	5	11	416.288	1.104	0.259	1.212
2018	1	5	12	415.222	1.084	0.170	0.255
2018	1	5	13	415.288	1.135	0.162	0.278
2018	1	5	14	415.182	1.021	0.199	0.249
2018	1	5	15	415.461	1.157	0.318	0.273
2018	1	5	16	416.702	1.463	0.606	0.920
2018	1	5	17	416.857	1.214	1.401	0.529
2018	1	5	18	417.204	1.111	2.001	0.379
2018	1	5	19	417.501	1.210	2.156	0.422
2018	1	5	20	418.066	1.545	2.255	0.553
2018	1	5	21	418.362	1.782	2.277	0.590
2018	1	5	22	418.530	1.968	2.240	0.609
2018	1	5	23	419.030	2.317	2.192	0.808
2018	1	6	0	418.973	2.219	2.138	0.903
2018	1	6	1	418.798	1.710	2.136	1.239
2018	1	6	2	418.485	1.333	2.097	1.342
2018	1	6	3	418.333	1.255	2.018	1.347
2018	1	6	4	418.176	1.301	1.883	1.279
2018	1	6	5	417.989	1.375	1.766	1.135
2018	1	6	6	417.963	1.363	1.767	1.120
2018	1	6	7	417.458	1.217	1.766	0.762
2018	1	6	8	417.290	1.197	1.691	0.689
2018	1	6	9	417.014	1.247	1.357	0.697
2018	1	6	10	416.806	1.224	1.054	0.815
2018	1	6	11	415.923	1.211	0.797	0.202
2018	1	6	12	415.019	0.803	0.415	0.088
2018	1	6	13	414.639	0.698	0.127	0.101
2018	1	6	14	414.634	0.642	0.163	0.116
2018	1	6	15	414.733	0.672	0.207	0.141
2018	1	6	16	414.695	0.588	0.278	0.116
2018	1	6	17	415.929	1.061	0.655	0.500
2018	1	6	18	417.020	0.967	1.592	0.748
2018	1	6	19	418.147	1.393	1.842	1.199
2018	1	6	20	419.259	2.021	2.072	1.453
2018	1	6	21	419.682	2.200	2.268	1.501
2018	1	6	22	419.887	2.036	2.341	1.797
2018	1	6	23	419.491	1.841	2.070	1.867
2018	1	7	0	419.069	1.561	1.912	1.883
2018	1	7	1	418.756	1.546	1.849	1.648
2018	1	7	2	418.708	1.555	1.885	1.555
2018	1	7	3	418.695	1.501	1.932	1.549
2018	1	7	4	418.540	1.450	1.921	1.456
2018	1	7	5	418.354	1.407	1.843	1.391
2018	1	7	6	418.292	1.400	1.808	1.371
2018	1	7	7	418.174	1.496	1.683	1.282
2018	1	7	8	417.973	1.488	1.509	1.263
2018	1	7	9	417.549	1.548	1.005	1.283
2018	1	7	10	417.195	1.626	0.513	1.343
2018	1	7	11	415.769	1.709	-0.003	0.350
2018	1	7	12	414.547	0.918	-0.240	0.156
2018	1	7	13	414.095	0.591	-0.306	0.097
2018	1	7	14	414.011	0.423	-0.189	0.064
2018	1	7	15	414.111	0.425	-0.091	0.064
2018	1	7	16	414.596	0.643	0.068	0.172
2018	1	7	17	415.488	0.643	0.711	0.421
2018	1	7	18	415.746	0.640	1.023	0.370
2018	1	7	19	416.160	0.757	1.173	0.517
2018	1	7	20	416.455	0.821	1.367	0.554
2018	1	7	21	416.520	0.855	1.394	0.558
2018	1	7	22	416.730	0.986	1.369	0.662
2018	1	7	23	416.708	0.973	1.331	0.691
2018	1	8	0	416.669	0.946	1.309	0.701
2018	1	8	1	416.272	0.746	1.288	0.525
2018	1	8	2	415.666	0.495	1.273	0.185
2018	1	8	3	415.475	0.441	1.227	0.094
2018	1	8	4	415.298	0.392	1.182	0.011
2018	1	8	5	415.311	0.570	1.024	0.004
2018	1	8	6	416.622	1.985	0.921	0.003
2018	1	8	7	418.417	3.638	1.064	0.002
2018	1	8	8	419.309	4.212	1.382	0.002
2018	1	8	9	419.178	4.366	1.097	0.002
2018	1	8	10	418.981	4.570	0.696	0.002
2018	1	8	11	419.296	4.965	0.616	0.002
2018	1	8	12	419.580	5.184	0.681	0.002
2018	1	8	13	419.846	5.444	0.686	0.003
2018	1	8	14	419.947	5.570	0.660	0.004
2018	1	8	15	420.024	5.631	0.676	0.004
2018	1	8	16	420.312	5.567	1.028	0.004
2018	1	8	17	419.827	4.441	1.669	0.004
2018	1	8	18	418.161	2.490	1.954	0.004
2018	1	8	19	417.272	1.418	2.135	0.006
2018	1	8	20	417.487	1.177	2.592	0.005
2018	1	8	21	417.751	1.181	2.853	0.004
2018	1	8	22	417.660	1.262	2.679	0.006
2018	1	8	23	418.248	1.266	3.259	0.010
2018	1	9	0	418.269	1.275	3.271	0.010
2018	1	9	1	417.683	1.476	2.487	0.007
2018	1	9	2	417.129	1.217	2.188	0.011
2018	1	9	3	416.519	0.576	2.213	0.017
2018	1	9	4	416.212	0.336	2.142	0.021
2018	1	9	5	416.221	0.373	2.105	0.030
2018	1	9	6	416.338	0.584	2.006	0.035
2018	1	9	7	417.389	1.115	2.153	0.408
2018	1	9	8	418.888	2.034	2.412	0.729
2018	1	9	9	418.559	2.212	1.893	0.741
2018	1	9	10	416.966	1.526	1.219	0.508
2018	1	9	11	415.956	1.145	0.972	0.126
2018	1	9	12	415.029	0.728	0.497	0.091
2018	1	9	13	414.522	0.527	0.238	0.044
2018	1	9	14	414.449	0.485	0.214	0.037
2018	1	9	15	414.326	0.389	0.181	0.043
2018	1	9	16	414.300	0.326	0.233	0.028
2018	1	9	17	414.832	0.468	0.483	0.168
2018	1	9	18	415.237	0.428	0.872	0.224
2018	1	9	19	415.608	0.472	1.165	0.258
2018	1	9	20	415.900	0.571	1.344	0.272
2018	1	9	21	416.220	0.675	1.556	0.276
2018	1	9	22	416.309	0.715	1.652	0.229
2018	1	9	23	416.294	0.701	1.649	0.231
2018	1	10	0	416.230	0.646	1.634	0.237
2018	1	10	1	415.969	0.564	1.636	0.056
2018	1	10	2	415.723	0.408	1.573	0.029
2018	1	10	3	415.539	0.317	1.484	0.025
2018	1	10	4	415.503	0.251	1.482	0.057
2018	1	10	5	415.509	0.250	1.491	0.055
2018	1	10	6	415.823	0.318	1.741	0.051
2018	1	10	7	416.015	0.347	1.873	0.082
2018	1	10	8	415.970	0.368	1.806	0.083
2018	1	10	9	415.757	0.474	1.483	0.087
2018	1	10	10	416.386	1.253	1.124	0.296
2018	1	10	11	415.272	0.870	0.579	0.110
2018	1	10	12	414.901	0.743	0.351	0.094
2018	1	10	13	414.393	0.437	0.203	0.040
2018	1	10	14	414.347	0.420	0.185	0.029
2018	1	10	15	414.558	0.543	0.271	0.031
2018	1	10	16	415.298	0.935	0.482	0.168
2018	1	10	17	416.588	1.580	0.864	0.431
2018	1	10	18	416.828	1.426	1.314	0.375
2018	1	10	19	417.381	1.634	1.453	0.581
2018	1	10	20	417.742	1.684	1.642	0.703
2018	1	10	21	417.942	1.721	1.781	0.727
2018	1	10	22	417.293	1.270	1.885	0.425
2018	1	10	23	416.475	0.756	1.842	0.164
2018	1	11	0	416.044	0.514	1.719	0.098
2018	1	11	1	416.015	0.520	1.689	0.093
2018	1	11	2	415.909	0.418	1.693	0.085
2018	1	11	3	416.054	0.483	1.760	0.098
2018	1	11	4	416.481	0.918	1.683	0.167
2018	1	11	5	417.140	1.721	1.464	0.242
2018	1	11	6	417.299	1.877	1.409	0.300
2018	1	11	7	417.759	2.044	1.498	0.504
2018	1	11	8	417.898	2.160	1.338	0.687
2018	1	11	9	417.628	2.154	0.980	0.781
2018	1	11	10	417.461	2.129	0.628	0.991
2018	1	11	11	415.547	1.256	0.304	0.274
2018	1	11	12	414.954	0.919	0.156	0.166
2018	1	11	13	415.084	1.051	0.118	0.202
2018	1	11	14	414.730	0.775	0.028	0.214
2018	1	11	15	414.802	0.761	0.070	0.258
2018	1	11	16	416.209	1.464	0.254	0.778
2018	1	11	17	416.933	1.720	0.663	0.837
2018	1	11	18	416.890	1.569	0.949	0.659
2018	1	11	19	416.541	1.383	1.072	0.373
2018	1	11	20	416.332	1.291	1.035	0.293
2018	1	11	21	416.259	1.268	1.003	0.275
2018	1	11	22	416.289	1.330	0.967	0.279
2018	1	11	23	416.360	1.384	0.946	0.317
2018	1	12	0	416.384	1.413	0.930	0.328
2018	1	12	1	416.338	1.383	0.923	0.319
2018	1	12	2	416.483	1.451	0.935	0.384
2018	1	12	3	416.546	1.490	0.935	0.408
2018	1	12	4	416.884	1.625	0.912	0.634
2018	1	12	5	416.658	1.551	0.874	0.520
2018	1	12	6	416.552	1.492	0.865	0.482
2018	1	12	7	417.045	1.571	0.927	0.834
2018	1	12	8	417.123	1.413	0.883	1.114
2018	1	12	9	416.807	1.297	0.551	1.246
2018	1	12	10	416.430	1.380	0.154	1.183
2018	1	12	11	414.719	0.966	-0.190	0.230
2018	1	12	12	414.243	0.678	-0.294	0.146
2018	1	12	13	414.003	0.521	-0.299	0.068
2018	1	12	14	414.461	0.674	0.037	0.037
2018	1	12	15	414.608	0.639	0.216	0.040
2018	1	12	16	414.678	0.663	0.287	0.015
2018	1	12	17	414.972	0.748	0.472	0.039
2018	1	12	18	415.368	0.591	1.017	0.047
2018	1	12	19	416.132	0.619	1.558	0.242
2018	1	12	20	417.078	1.177	1.720	0.468
2018	1	12	21	417.574	1.385	1.985	0.491
2018	1	12	22	418.878	2.405	1.858	0.902
2018	1	12	23	418.705	2.385	1.676	0.931
2018	1	13	0	418.528	2.311	1.586	0.918
2018	1	13	1	418.541	2.125	1.710	0.993
2018	1	13	2	418.527	1.870	1.955	0.989
2018	1	13	3	418.396	1.712	1.976	0.995
2018	1	13	4	418.512	1.905	1.944	0.950
2018	1	13	5	418.207	1.613	1.888	0.993
2018	1	13	6	418.003	1.411	1.834	1.045
2018	1	13	7	418.059	1.271	1.806	1.269
2018	1	13	8	417.666	1.209	1.535	1.209
2018	1	13	9	417.087	1.200	1.029	1.145
2018	1	13	10	416.431	1.268	0.456	0.994
2018	1	13	11	415.112	1.007	0.155	0.237
2018	1	13	12	414.482	0.596	0.032	0.141
2018	1	13	13	414.517	0.603	0.066	0.135
2018	1	13	14	414.557	0.590	0.116	0.138
2018	1	13	15	414.848	0.722	0.256	0.157
2018	1	13	16	415.386	0.973	0.449	0.251
2018	1	13	17	417.434	1.674	0.991	1.056
2018	1	13	18	417.632	1.588	1.447	0.884
2018	1	13	19	417.695	1.547	1.557	0.878
2018	1	13	20	417.688	1.525	1.567	0.883
2018	1	13	21	417.593	1.552	1.460	0.868
2018	1	13	22	417.688	1.761	1.302	0.912
2018	1	13	23	417.329	1.578	1.158	0.880
2018	1	14	0	417.239	1.545	1.119	0.862
2018	1	14	1	417.346	1.384	1.099	1.150
2018	1	14	2	417.243	1.205	1.080	1.245
2018	1	14	3	417.183	1.132	1.066	1.272
2018	1	14	4	416.892	0.879	0.976	1.324
2018	1	14	5	416.628	0.643	0.979	1.293
2018	1	14	6	416.519	0.571	0.958	1.277
2018	1	14	7	416.086	0.308	1.154	0.911
2018	1	14	8	415.984	0.253	1.264	0.754
2018	1	14	9	415.521	0.273	0.778	0.757
2018	1	14	10	416.256	0.835	0.079	1.629
2018	1	14	11	414.457	0.921	-0.514	0.337
2018	1	14	12	414.197	0.784	-0.512	0.212
2018	1	14	13	414.538	1.013	-0.387	0.199
2018	1	14	14	414.768	1.019	-0.164	0.200
2018	1	14	15	414.971	1.084	-0.047	0.221
2018	1	14	16	416.008	1.492	0.215	0.588
2018	1	14	17	417.620	1.954	0.795	1.158
2018	1	14	18	417.932	2.124	1.096	0.999
2018	1	14	19	417.909	2.134	1.302	0.760
2018	1	14	20	417.852	2.088	1.372	0.679
2018	1	14	21	417.522	1.969	1.264	0.576
2018	1	14	22	416.582	1.139	1.289	0.441
2018	1	14	23	415.839	0.608	1.297	0.221
2018	1	15	0	415.615	0.481	1.258	0.163
2018	1	15	1	415.311	0.299	1.254	0.045
2018	1	15	2	415.282	0.330	1.226	0.013
2018	1	15	3	415.313	0.407	1.183	0.010
2018	1	15	4	415.369	0.493	1.157	0.006
2018	1	15	5	415.475	0.572	1.184	0.006
2018	1	15	6	415.561	0.621	1.219	0.008
2018	1	15	7	415.564	0.633	1.211	0.007
2018	1	15	8	415.382	0.619	1.045	0.005
2018	1	15	9	414.916	0.584	0.614	0.005
2018	1	15	10	414.957	0.613	0.629	0.002
2018	1	15	11	415.046	0.951	0.381	0.001
2018	1	15	12	414.801	0.829	0.259	0.000
2018	1	15	13	414.815	1.200	-0.098	0.000
2018	1	15	14	414.792	1.318	-0.240	0.001
2018	1	15	15	415.126	1.391	0.021	0.001
2018	1	15	16	415.304	1.515	0.069	0.007
2018	1	15	17	415.274	0.908	0.608	0.045
2018	1	15	18	416.450	0.992	1.692	0.053
2018	1	15	19	416.700	1.361	1.569	0.057
2018	1	15	20	417.247	1.790	1.482	0.262
2018	1	15	21	417.520	1.714	1.658	0.435
2018	1	15	22	418.263	1.141	1.944	1.465
2018	1	15	23	418.050	1.002	1.734	1.601
2018	1	16	0	417.935	0.925	1.701	1.596
2018	1	16	1	417.808	1.125	1.407	1.563
2018	1	16	2	417.794	1.070	1.434	1.577
2018	1	16	3	417.693	0.909	1.505	1.566
2018	1	16	4	417.753	0.630	1.496	1.914
2018	1	16	5	417.617	0.548	1.480	1.876
2018	1	16	6	417.538	0.451	1.491	1.883
2018	1	16	7	417.461	0.551	1.479	1.718
2018	1	16	8	417.492	0.792	1.509	1.478
2018	1	16	9	417.274	0.962	1.206	1.393
2018	1	16	10	416.393	1.053	0.858	0.769
2018	1	16	11	415.574	0.891	0.564	0.406
2018	1	16	12	414.648	0.594	0.309	0.032
2018	1	16	13	414.399	0.452	0.217	0.017
2018	1	16	14	414.397	0.439	0.237	0.008
2018	1	16	15	414.574	0.544	0.314	0.003
2018	1	16	16	414.895	0.764	0.416	0.002
2018	1	16	17	415.352	0.935	0.702	0.002
2018	1	16	18	417.868	1.919	2.235	0.001
2018	1	16	19	420.428	3.328	3.387	0.000
2018	1	16	20	423.731	5.492	4.526	0.000
2018	1	16	21	424.934	6.816	4.405	0.000
2018	1	16	22	423.723	6.935	3.074	0.001
2018	1	16	23	418.131	2.482	1.932	0.004
2018	1	17	0	416.533	1.125	1.687	0.008
2018	1	17	1	416.555	1.191	1.610	0.041
2018	1	17	2	417.019	1.340	1.851	0.115
2018	1	17	3	417.277	1.288	2.118	0.158
2018	1	17	4	418.588	1.548	2.697	0.630
2018	1	17	5	419.057	1.642	2.859	0.843
2018	1	17	6	419.195	1.588	2.989	0.905
2018	1	17	7	420.050	1.561	3.370	1.406
2018	1	17	8	419.933	1.195	3.840	1.185
2018	1	17	9	418.308	0.856	3.121	0.618
2018	1	17	10	415.795	0.437	1.619	0.026
2018	1	17	11	414.402	0.266	0.421	0.002
2018	1	17	12	414.834	0.529	0.591	0.001
2018	1	17	13	415.247	1.009	0.525	0.000
2018	1	17	14	414.891	0.940	0.238	0.000
2018	1	17	15	414.479	0.604	0.162	0.000
2018	1	17	16	414.108	0.277	0.118	0.000
2018	1	17	17	413.955	0.105	0.137	0.000
2018	1	17	18	413.941	0.072	0.156	0.000
2018	1	17	19	413.977	0.056	0.207	0.001
2018	1	17	20	414.005	0.038	0.253	0.001
2018	1	17	21	414.078	0.024	0.340	0.001
2018	1	17	22	414.818	0.063	1.038	0.004
2018	1	17	23	414.739	0.043	0.978	0.005
2018	1	18	0	414.568	0.034	0.816	0.005
2018	1	18	1	414.707	0.005	0.973	0.016
2018	1	18	2	414.758	-0.008	1.030	0.023
2018	1	18	3	414.779	-0.011	1.054	0.023
2018	1	18	4	414.905	-0.016	1.176	0.032
2018	1	18	5	415.344	-0.047	1.596	0.082
2018	1	18	6	415.626	-0.069	1.851	0.131
2018	1	18	7	417.639	0.691	2.118	1.117
2018	1	18	8	417.996	1.296	1.632	1.355
2018	1	18	9	417.603	1.487	1.039	1.364
2018	1	18	10	417.417	1.664	0.457	1.583
2018	1	18	11	415.768	1.799	-0.078	0.334
2018	1	18	12	415.631	1.629	0.083	0.206
2018	1	18	13	415.834	1.596	0.355	0.170
2018	1	18	14	415.669	1.407	0.430	0.119
2018	1	18	15	415.831	1.403	0.591	0.124
2018	1	18	16	416.610	1.727	0.909	0.261
2018	1	18	17	419.303	2.347	2.164	1.079
2018	1	18	18	419.959	2.241	3.111	0.894
2018	1	18	19	419.729	2.102	2.912	1.002
2018	1	18	20	420.009	2.637	2.624	1.035
2018	1	18	21	420.145	2.966	2.466	1.000
2018	1	18	22	419.922	2.264	2.538	1.407
2018	1	18	23	419.965	2.145	2.616	1.491
2018	1	19	0	419.913	2.077	2.651	1.472
2018	1	19	1	419.449	2.200	2.378	1.158
2018	1	19	2	419.170	2.080	2.153	1.224
2018	1	19	3	418.726	1.808	1.973	1.232
2018	1	19	4	418.345	1.591	1.944	1.097
2018	1	19	5	418.264	1.414	2.052	1.085
2018	1	19	6	418.251	1.377	2.081	1.080
2018	1	19	7	418.436	1.432	2.162	1.129
2018	1	19	8	418.456	1.621	2.000	1.122
2018	1	19	9	417.692	1.658	1.200	1.121
2018	1	19	10	417.026	1.682	0.604	1.027
2018	1	19	11	415.128	1.084	0.188	0.143
2018	1	19	12	414.778	0.890	0.080	0.095
2018	1	19	13	414.675	0.798	0.093	0.071
2018	1	19	14	414.369	0.607	-0.027	0.076
2018	1	19	15	414.366	0.639	-0.077	0.091
2018	1	19	16	415.102	1.097	-0.033	0.325
2018	1	19	17	416.949	1.700	0.328	1.208
2018	1	19	18	417.582	1.939	0.870	1.060
2018	1	19	19	417.841	1.920	1.107	1.101
2018	1	19	20	418.047	1.760	1.388	1.186
2018	1	19	21	418.081	1.663	1.488	1.217
2018	1	19	22	418.030	1.746	1.481	1.090
2018	1	19	23	418.007	1.812	1.464	1.018
2018	1	20	0	417.680	1.577	1.430	0.960
2018	1	20	1	417.572	1.446	1.431	0.982
2018	1	20	2	417.542	1.474	1.434	0.921
2018	1	20	3	417.482	1.435	1.457	0.877
2018	1	20	4	417.448	1.354	1.549	0.832
2018	1	20	5	417.637	1.328	1.710	0.886
2018	1	20	6	417.700	1.346	1.752	0.889
2018	1	20	7	416.797	0.900	1.952	0.232
2018	1	20	8	416.140	0.405	1.940	0.082
2018	1	20	9	415.206	0.298	1.100	0.095
2018	1	20	10	414.215	0.198	0.297	0.007
2018	1	20	11	414.426	0.343	0.370	0.000
2018	1	20	12	414.316	0.341	0.262	0.000
2018	1	20	13	414.358	0.472	0.173	0.000
2018	1	20	14	415.008	1.141	0.154	0.000
2018	1	20	15	416.447	2.445	0.289	0.000
2018	1	20	16	416.176	2.161	0.300	0.002
2018	1	20	17	415.178	1.263	0.163	0.039
2018	1	20	18	415.646	0.775	1.017	0.141
2018	1	20	19	417.891	1.561	1.909	0.708
2018	1	20	20	419.021	2.096	2.180	1.032
2018	1	20	21	419.188	2.140	2.288	1.047
2018	1	20	22	419.042	2.108	2.159	1.062
2018	1	20	23	418.628	1.964	1.954	0.997
2018	1	21	0	418.428	1.902	1.815	0.998
2018	1	21	1	418.287	1.857	1.709	1.008
2018	1	21	2	418.166	1.827	1.595	1.031
2018	1	21	3	418.023	1.783	1.501	1.026
2018	1	21	4	417.518	1.359	1.420	1.026
2018	1	21	5	417.381	1.229	1.367	1.072
2018	1	21	6	417.324	1.185	1.335	1.091
2018	1	21	7	417.141	1.170	1.347	0.911
2018	1	21	8	417.051	1.238	1.270	0.830
2018	1	21	9	416.620	1.278	0.812	0.817
2018	1	21	10	416.701	1.657	0.504	0.827
2018	1	21	11	415.378	1.129	0.254	0.282
2018	1	21	12	414.766	0.790	0.126	0.137
2018	1	21	13	414.641	0.759	0.052	0.117
2018	1	21	14	414.585	0.781	-0.054	0.145
2018	1	21	15	414.606	0.769	-0.053	0.177
2018	1	21	16	415.008	0.912	0.124	0.259
2018	1	21	17	416.517	0.924	0.495	1.385
2018	1	21	18	416.921	0.984	0.863	1.361
2018	1	21	19	417.157	0.747	1.035	1.662
2018	1	21	20	417.424	0.784	1.171	1.756
2018	1	21	21	417.325	0.683	1.172	1.757
2018	1	21	22	417.364	1.081	1.125	1.445
2018	1	21	23	417.368	1.177	1.149	1.329
2018	1	22	0	417.332	1.158	1.128	1.333
2018	1	22	1	417.167	1.212	1.006	1.236
2018	1	22	2	417.034	1.231	0.918	1.172
2018	1	22	3	417.023	1.247	0.908	1.155
2018	1	22	4	416.914	0.981	0.901	1.319
2018	1	22	5	416.853	0.817	0.929	1.394
2018	1	22	6	416.803	0.801	0.887	1.402
2018	1	22	7	416.821	0.835	0.999	1.274
2018	1	22	8	416.747	0.809	1.153	1.072
2018	1	22	9	416.449	0.804	0.970	0.962
2018	1	22	10	415.172	0.489	0.656	0.314
2018	1	22	11	414.561	0.378	0.401	0.069
2018	1	22	12	414.157	0.206	0.224	0.014
2018	1	22	13	414.017	0.150	0.152	0.002
2018	1	22	14	413.895	0.091	0.091	0.000
2018	1	22	15	414.086	0.240	0.133	0.000
2018	1	22	16	414.144	0.277	0.154	0.000
2018	1	22	17	414.270	0.269	0.287	0.001
2018	1	22	18	414.546	0.241	0.590	0.002
2018	1	22	19	414.581	0.230	0.634	0.004
2018	1	22	20	415.015	0.498	0.800	0.004
2018	1	22	21	414.682	0.295	0.670	0.004
2018	1	22	22	414.780	0.289	0.775	0.003
2018	1	22	23	414.928	0.326	0.887	0.002
2018	1	23	0	414.843	0.276	0.852	0.002
[truncated: 3,096 more rows]
