# Supplementary material for: Measurement report: Method for evaluating CO 2 emissions from a cement plant using atmospheric δ (O 2 ∕ N 2 ) and CO 2 measurements and its implication for future detection of CO 2 capture signals
Source: Copernicus journal article supplement (doi:10.5194/acp-24-1059-2024), 2024-01-24
Supplement: Supplementary file 2 [file acp-24-1059-2024-supplement.zip › Supplement_data_r.csv]

delta(O2/N2) and CO2 amount factions data at RYO used in the present study.
delta(O2/N2) and CO2 amount factions are reported in per meg and micro_mol/mol, respectively.
Data time zone is UTC+09:00.
See text in more detail.
Year	Month	Day	Hour	Minute	delta(O2/N2)	y(CO2)
2017	8	4	10	28	-44.4	395.53
2017	8	4	11	36	-32.1	394.99
2017	8	4	12	44	-33.3	393.90
2017	8	4	13	56	-28.4	394.14
2017	8	4	15	5	-30.5	393.26
2017	8	4	16	12	-46.4	395.47
2017	8	4	17	23	-49.3	396.44
2017	8	4	18	34	-44.8	396.42
2017	8	4	19	41	-40.1	396.46
2017	8	4	20	50	-42.8	396.61
2017	8	4	22	3	-55.9	397.15
2017	8	4	23	10	-50.6	396.95
2017	8	5	0	18	-49.9	397.40
2017	8	5	1	31	-54.2	398.84
2017	8	5	2	39	-49.6	398.76
2017	8	5	3	47	-43.4	398.52
2017	8	5	4	58	-57.5	399.15
2017	8	5	6	8	-60.5	399.68
2017	8	5	7	16	-51.4	397.95
2017	8	5	8	25	-39.7	396.71
2017	8	5	9	37	-35.4	395.50
2017	8	5	10	45	-34.9	394.81
2017	8	5	11	53	-28.1	392.20
2017	8	5	13	6	-19.6	392.65
2017	8	5	14	14	-20.5	393.21
2017	8	5	15	21	-36.3	396.04
2017	8	5	16	34	-46.4	398.77
2017	8	5	17	43	-64.7	401.27
2017	8	5	18	50	-73.0	401.58
2017	8	5	20	1	-65.6	401.83
2017	8	5	21	12	-60.3	400.56
2017	8	5	22	19	-51.2	399.45
2017	8	5	23	28	-58.1	401.11
2017	8	6	0	41	-67.6	401.74
2017	8	6	1	48	-61.8	400.91
2017	8	6	2	56	-53.1	399.78
2017	8	6	4	9	-58.4	399.97
2017	8	6	5	17	-58.8	399.79
2017	8	6	6	25	-63.3	401.64
2017	8	6	7	37	-41.5	394.90
2017	8	6	8	46	-33.7	393.88
2017	8	6	9	54	-28.2	393.07
2017	8	6	11	4	-22.1	392.53
2017	8	6	12	15	-17.0	391.76
2017	8	6	13	23	-19.2	392.58
2017	8	6	14	31	-28.9	393.23
2017	8	6	15	44	-21.7	393.93
2017	8	6	16	52	-28.4	394.51
2017	8	6	17	59	-37.6	395.87
2017	8	6	19	12	-40.9	396.48
2017	8	6	20	21	-42.7	396.21
2017	8	6	21	28	-46.4	396.80
2017	8	6	22	39	-45.4	397.34
2017	8	6	23	50	-45.7	397.94
2017	8	7	0	57	-42.4	397.98
2017	8	7	2	6	-46.4	398.48
2017	8	7	3	19	-50.8	397.98
2017	8	7	4	26	-47.6	397.71
2017	8	7	5	34	-44.0	397.18
2017	8	7	6	48	-43.9	396.67
2017	8	7	7	55	-42.3	396.42
2017	8	7	9	3	-42.1	396.54
2017	8	7	10	15	-40.4	394.45
2017	8	7	11	24	-32.0	393.83
2017	8	7	12	32	-34.6	394.18
2017	8	7	13	42	-35.2	394.96
2017	8	7	14	53	-33.5	395.25
2017	8	7	16	1	-38.2	394.86
2017	8	7	17	9	-38.8	394.53
2017	8	7	18	22	-32.7	394.72
2017	8	7	19	30	-28.3	394.14
2017	8	7	20	37	-27.4	393.61
2017	8	7	21	50	-27.1	393.36
2017	8	7	22	59	-25.1	392.60
2017	8	8	0	6	-27.5	392.25
2017	8	8	1	18	-23.3	392.62
2017	8	8	2	28	-24.3	392.93
2017	8	8	3	35	-27.9	393.14
2017	8	8	4	45	-29.1	393.48
2017	8	8	5	57	-32.1	394.10
2017	8	8	7	4	-44.4	397.15
2017	8	8	8	12	-49.7	398.07
2017	8	8	9	25	-41.6	397.70
2017	8	8	10	33	-43.3	397.52
2017	8	8	11	41	-49.3	398.07
2017	8	8	12	53	-45.1	397.43
2017	8	8	14	2	-47.1	398.01
2017	8	8	15	10	-55.4	399.28
2017	8	8	16	20	-56.6	399.32
2017	8	8	17	31	-47.5	399.19
2017	8	8	18	39	-52.3	399.68
2017	8	8	19	48	-54.9	400.65
2017	8	8	21	0	-48.7	400.89
2017	8	8	22	8	-51.7	401.00
2017	8	8	23	15	-65.9	402.66
2017	8	9	0	29	-61.5	402.45
2017	8	9	1	36	-68.1	402.02
2017	8	9	2	44	-65.2	401.59
2017	8	9	3	56	-62.3	402.20
2017	8	9	5	5	-55.2	402.32
2017	8	9	6	13	-51.0	402.00
2017	8	9	7	23	-51.2	401.82
2017	8	9	8	34	-57.4	401.36
2017	8	9	9	42	-51.1	400.78
2017	8	9	10	50	-42.6	400.72
2017	8	9	12	3	-53.8	400.09
2017	8	9	13	11	-52.7	399.54
2017	8	9	14	19	-53.9	399.83
2017	8	9	15	32	-67.5	400.85
2017	8	9	16	40	-71.8	402.13
2017	8	9	17	48	-67.5	402.88
2017	8	9	18	59	-65.3	403.26
2017	8	9	20	9	-65.0	403.98
2017	8	9	21	17	-74.2	404.93
2017	8	9	22	26	-74.5	404.61
2017	8	9	23	38	-73.2	405.31
2017	8	10	0	46	-76.0	405.96
2017	8	10	1	53	-78.2	406.26
2017	8	10	3	7	-80.6	407.40
2017	8	10	4	14	-75.4	405.24
2017	8	10	5	22	-75.7	405.14
2017	8	10	6	34	-73.9	405.15
2017	8	10	7	43	-78.7	406.04
2017	8	10	8	51	-79.4	406.41
2017	8	10	10	2	-68.5	404.92
2017	8	10	11	12	-46.3	400.76
2017	8	10	12	20	-24.7	397.73
2017	8	10	13	29	-18.9	397.64
2017	8	10	14	41	-19.9	398.17
2017	8	10	15	49	-16.5	398.20
2017	8	10	16	57	-25.9	400.11
2017	8	10	18	10	-36.1	400.77
2017	8	10	19	18	-31.4	401.52
2017	8	10	20	26	-29.1	402.03
2017	8	10	21	37	-33.5	403.06
2017	8	10	22	47	-37.2	404.66
2017	8	10	23	54	-49.3	405.80
2017	8	11	1	4	-47.1	405.55
2017	8	11	2	16	-51.9	407.04
2017	8	11	3	23	-48.2	405.66
2017	8	11	4	31	-46.4	405.54
2017	8	11	5	45	-45.3	406.44
2017	8	11	6	52	-58.9	407.81
2017	8	11	8	0	-46.6	404.59
2017	8	11	9	13	-16.3	399.73
2017	8	11	10	21	-1.4	396.76
2017	8	11	11	29	16.3	392.87
2017	8	11	12	40	25.6	392.09
2017	8	11	13	50	27.7	390.32
2017	8	11	14	58	18.2	392.12
2017	8	11	16	7	15.3	393.08
2017	8	11	17	19	1.9	392.89
2017	8	11	18	27	-24.1	399.13
2017	8	11	19	34	-30.3	401.24
2017	8	11	20	48	-62.5	402.68
2017	8	11	21	56	-64.8	403.84
2017	8	11	23	3	-71.4	404.32
2017	8	12	0	15	-82.3	405.80
2017	8	12	1	25	-77.7	405.75
2017	8	12	2	32	-82.5	406.06
2017	8	12	3	43	-72.2	405.36
2017	8	12	4	54	-55.0	403.54
2017	8	12	6	1	-54.7	402.01
2017	8	12	7	10	-50.0	401.29
2017	8	12	8	23	-43.0	400.58
2017	8	12	9	30	-40.0	399.03
2017	8	12	10	38	-37.8	398.01
2017	8	12	11	51	-41.3	398.30
2017	8	12	12	59	-35.3	398.41
2017	8	12	14	7	-29.9	398.12
2017	8	12	15	18	-29.7	398.96
2017	8	12	16	28	-45.3	400.20
2017	8	12	17	36	-49.0	400.89
2017	8	12	18	45	-52.6	402.20
2017	8	12	19	57	-56.5	402.64
2017	8	12	21	5	-59.7	402.68
2017	8	12	22	12	-58.5	402.89
2017	8	12	23	26	-65.7	401.94
2017	8	13	0	34	-64.7	402.48
2017	8	13	1	41	-65.6	403.14
2017	8	13	2	54	-64.8	403.43
2017	8	13	4	3	-60.2	403.54
2017	8	13	5	10	-60.8	403.48
2017	8	13	6	21	-61.2	403.00
2017	8	13	7	32	-50.8	402.05
2017	8	13	8	39	-46.3	400.58
2017	8	13	9	48	-39.6	399.66
2017	8	13	11	1	-33.4	398.76
2017	8	13	12	8	-40.3	399.43
2017	8	13	13	16	-43.8	398.80
2017	8	13	14	29	-44.0	399.16
2017	8	13	15	37	-46.5	399.83
2017	8	13	16	45	-44.7	400.58
2017	8	13	17	56	-51.3	402.03
2017	8	13	19	6	-59.2	402.44
2017	8	13	20	14	-64.7	403.50
2017	8	13	21	24	-62.7	403.33
2017	8	13	22	35	-64.1	403.03
2017	8	13	23	43	-65.7	403.54
2017	8	14	0	51	-55.9	403.82
2017	8	14	2	4	-58.7	402.25
2017	8	14	3	12	-63.4	402.66
2017	8	14	4	19	-61.3	402.62
2017	8	14	5	32	-66.7	403.27
2017	8	14	6	41	-61.8	402.31
2017	8	14	7	48	-59.2	401.60
2017	8	14	8	59	-58.9	399.93
2017	8	14	10	56	-44.0	397.58
2017	8	14	12	19	-39.7	397.07
2017	8	14	13	29	-29.6	394.72
2017	8	14	14	41	-29.3	395.18
2017	8	14	15	48	-40.6	397.70
2017	8	14	16	56	-47.8	398.83
2017	8	14	18	10	-61.6	401.83
2017	8	14	19	17	-65.5	402.87
2017	8	14	20	25	-66.0	403.30
2017	8	14	21	37	-69.8	405.01
2017	8	14	22	46	-73.7	404.02
2017	8	14	23	54	-72.7	404.06
2017	8	15	1	4	-68.0	404.40
2017	8	15	2	15	-73.5	405.30
2017	8	15	3	23	-73.1	405.15
2017	8	15	4	32	-70.3	405.51
2017	8	15	5	44	-83.8	404.54
2017	8	15	6	52	-81.5	404.49
2017	8	15	7	59	-69.2	403.39
2017	8	15	9	13	-52.1	400.83
2017	8	15	10	21	-42.8	399.81
2017	8	15	11	28	-24.3	397.19
2017	8	15	12	40	-39.5	397.53
2017	8	15	13	50	-41.5	398.85
2017	8	15	14	57	-42.3	399.04
2017	8	15	16	7	-44.4	399.42
2017	8	15	17	19	-45.4	400.74
2017	8	15	18	26	-46.6	400.50
2017	8	15	19	34	-51.9	399.95
2017	8	15	20	48	-49.6	400.50
2017	8	15	21	55	-46.9	400.94
2017	8	15	23	3	-57.7	402.54
2017	8	16	0	16	-63.1	402.91
2017	8	16	1	24	-70.5	403.53
2017	8	16	2	32	-67.5	403.38
2017	8	16	3	43	-57.8	402.87
2017	8	16	4	53	-57.5	401.59
2017	8	16	6	1	-55.2	400.82
2017	8	16	7	10	-42.0	398.93
2017	8	16	8	22	-35.0	395.69
2017	8	16	9	30	-33.2	396.33
2017	8	16	10	37	-28.1	397.07
2017	8	16	11	51	-38.0	398.05
2017	8	16	12	59	-47.9	400.02
2017	8	16	14	6	-51.7	400.78
2017	8	16	15	18	-52.9	400.45
2017	8	16	16	28	-51.5	400.83
2017	8	16	17	35	-54.5	400.91
2017	8	16	18	45	-48.3	400.62
2017	8	16	19	57	-46.8	400.86
2017	8	16	21	4	-47.0	401.16
2017	8	16	22	13	-55.6	401.86
2017	8	16	23	26	-61.2	403.21
2017	8	17	0	33	-58.8	403.00
2017	8	17	1	41	-58.8	402.92
2017	8	17	2	54	-61.6	403.70
2017	8	17	4	2	-60.5	403.66
2017	8	17	5	10	-67.9	403.77
2017	8	17	6	21	-63.3	402.94
2017	8	17	7	31	-64.7	402.28
2017	8	17	8	39	-55.6	401.75
2017	8	17	9	48	-50.0	401.60
2017	8	17	11	0	-55.4	400.42
2017	8	17	12	8	-59.2	400.45
2017	8	17	13	15	-52.3	400.54
2017	8	17	14	29	-56.6	401.04
2017	8	17	15	37	-55.5	401.35
2017	8	17	16	44	-54.6	401.68
2017	8	17	17	57	-61.2	401.25
2017	8	17	19	6	-58.3	401.39
2017	8	17	20	13	-59.4	401.70
2017	8	17	21	24	-63.9	402.15
2017	8	17	22	35	-57.4	401.79
2017	8	17	23	42	-56.2	401.53
2017	8	18	0	51	-58.7	401.43
2017	8	18	2	4	-59.7	401.53
2017	8	18	3	11	-68.9	403.18
2017	8	18	4	19	-74.1	403.68
2017	8	18	5	32	-73.1	404.71
2017	8	18	6	40	-66.8	403.33
2017	8	18	7	48	-53.2	400.90
2017	8	18	8	59	-50.9	400.33
2017	8	18	11	11	-48.0	399.67
2017	8	18	12	45	-39.6	398.19
2017	8	18	13	55	-46.7	399.30
2017	8	18	15	6	-45.6	399.39
2017	8	18	16	14	-49.7	399.70
2017	8	18	17	22	-62.2	400.49
2017	8	18	18	35	-69.7	402.10
2017	8	18	19	43	-68.8	402.49
2017	8	18	20	51	-69.1	402.35
2017	8	18	22	3	-67.0	403.16
2017	8	18	23	12	-73.3	403.88
2017	8	19	0	20	-76.7	404.03
2017	8	19	1	31	-69.7	403.40
2017	8	19	2	41	-74.6	403.38
2017	8	19	3	48	-75.5	404.07
2017	8	19	4	58	-78.3	406.13
2017	8	19	6	10	-82.8	405.19
2017	8	19	7	17	-99.4	409.05
2017	8	19	8	25	-97.7	408.38
2017	8	19	9	39	-72.3	403.07
2017	8	19	10	46	-53.9	399.87
2017	8	19	11	54	-33.2	397.10
2017	8	19	13	6	-48.1	398.43
2017	8	19	14	15	-43.4	399.11
2017	8	19	15	23	-48.6	399.83
2017	8	19	16	33	-56.5	401.47
2017	8	19	17	44	-52.3	401.48
2017	8	19	18	52	-60.7	402.76
2017	8	19	20	1	-65.9	402.36
2017	8	19	21	13	-75.7	403.75
2017	8	19	22	21	-84.6	405.41
2017	8	19	23	28	-89.6	406.68
2017	8	20	0	42	-80.5	405.90
2017	8	20	1	50	-91.8	407.15
2017	8	20	2	57	-92.1	406.84
2017	8	20	4	9	-89.5	407.55
2017	8	20	5	19	-87.0	407.81
2017	8	20	6	26	-87.8	407.46
2017	8	20	7	36	-64.3	403.50
2017	8	20	8	48	-53.9	399.64
2017	8	20	9	55	-44.8	397.99
2017	8	20	11	3	-39.3	397.14
2017	8	20	12	17	-28.5	395.31
2017	8	20	13	24	-24.3	394.81
2017	8	20	14	32	-30.8	395.34
2017	8	20	15	44	-48.5	397.12
2017	8	20	16	53	-51.1	398.87
2017	8	20	18	1	-59.9	400.70
2017	8	20	19	12	-59.9	400.94
2017	8	20	20	22	-54.0	400.64
2017	8	20	21	30	-54.2	400.16
2017	8	20	22	39	-56.4	399.65
2017	8	20	23	51	-55.9	400.20
2017	8	21	0	59	-59.2	401.93
2017	8	21	2	6	-57.3	401.73
2017	8	21	3	20	-57.8	401.54
2017	8	21	4	28	-58.1	400.59
2017	8	21	5	35	-53.5	399.94
2017	8	21	6	47	-51.0	400.24
2017	8	21	7	57	-53.3	399.61
2017	8	21	9	4	-55.9	400.15
2017	8	21	10	14	-46.4	399.94
2017	8	21	11	26	-48.7	397.86
2017	8	21	12	33	-50.2	398.36
2017	8	21	13	42	-38.4	396.92
2017	8	21	14	55	-32.2	395.48
2017	8	21	16	2	-52.9	399.87
2017	8	21	17	10	-53.7	400.55
2017	8	21	18	23	-56.1	399.91
2017	8	21	19	31	-52.4	399.71
2017	8	21	20	39	-53.6	399.76
2017	8	21	21	50	-56.5	399.79
2017	8	21	23	0	-56.1	399.94
2017	8	22	0	8	-51.8	400.08
2017	8	22	1	17	-59.7	400.09
2017	8	22	2	29	-68.9	401.88
2017	8	22	3	37	-73.2	403.82
2017	8	22	4	44	-111.5	411.27
2017	8	22	5	58	-177.4	424.44
2017	8	22	7	6	-207.8	429.18
2017	8	22	8	13	-207.5	427.23
2017	8	22	9	26	-151.9	417.56
2017	8	22	10	35	-144.3	415.29
2017	8	22	11	42	-146.3	415.17
2017	8	22	12	53	-147.3	416.31
2017	8	22	14	4	-121.0	409.51
2017	8	22	15	11	-104.0	405.69
2017	8	22	16	20	-107.3	407.79
2017	8	22	17	33	-126.5	410.19
2017	8	22	18	40	-133.1	412.30
2017	8	22	19	48	-135.8	413.65
2017	8	22	21	1	-152.0	416.34
2017	8	22	22	9	-169.7	420.08
2017	8	22	23	17	-180.0	421.86
2017	9	8	7	51	-59.1	399.41
2017	9	8	15	36	-39.2	398.06
2017	9	8	16	44	-46.7	398.78
2017	9	8	17	56	-53.4	399.93
2017	9	8	19	5	-76.1	402.12
2017	9	8	20	13	-75.6	402.23
2017	9	8	21	23	-78.3	403.64
2017	9	8	22	34	-77.6	403.45
2017	9	8	23	42	-80.4	406.38
2017	9	9	0	50	-88.6	408.91
2017	9	9	2	3	-96.8	406.06
2017	9	9	3	10	-80.9	403.41
2017	9	9	4	18	-72.8	402.16
2017	9	9	5	31	-65.8	401.39
2017	9	9	6	39	-59.2	400.54
2017	9	9	7	47	-48.2	399.70
2017	9	9	8	59	-48.0	396.67
2017	9	9	10	8	-57.8	398.72
2017	9	9	11	16	-53.4	398.76
2017	9	9	12	26	-43.3	397.51
2017	9	9	13	37	-51.7	397.63
2017	9	9	14	45	-53.1	397.66
2017	9	9	15	53	-50.4	396.79
2017	9	9	17	6	-49.4	398.50
2017	9	9	18	14	-63.3	400.42
2017	9	9	19	21	-47.7	397.28
2017	9	9	20	34	-57.4	401.69
2017	9	9	21	43	-83.6	403.70
2017	9	9	22	50	-106.5	408.95
2017	9	10	0	1	-100.7	409.79
2017	9	10	1	12	-112.7	414.40
2017	9	10	2	19	-89.8	405.88
2017	9	10	3	29	-73.6	404.02
2017	9	10	4	41	-102.4	408.99
2017	9	10	5	48	-131.0	418.15
2017	9	10	6	56	-124.3	417.33
2017	9	10	8	10	-71.0	403.86
2017	9	10	9	17	-62.2	401.70
2017	9	10	10	25	-64.9	400.69
2017	9	10	11	37	-48.8	396.00
2017	9	10	12	46	-43.8	396.00
2017	9	10	13	54	-30.1	393.12
2017	9	10	15	4	-30.7	393.93
2017	9	10	16	15	-33.6	395.78
2017	9	10	17	23	-43.1	398.40
2017	9	10	18	31	-54.7	398.60
2017	9	10	19	44	-54.4	398.81
2017	9	10	20	52	-70.0	401.35
2017	9	10	21	59	-70.8	402.35
2017	9	10	23	13	-82.7	407.16
2017	9	11	0	21	-104.6	409.89
2017	9	11	1	28	-119.9	413.25
2017	9	11	2	40	-121.9	412.94
2017	9	11	3	50	-115.7	413.83
2017	9	11	4	57	-115.3	411.92
2017	9	11	6	7	-93.4	408.89
2017	9	11	7	19	-102.9	413.44
2017	9	11	9	11	-88.4	410.99
2017	9	11	11	22	-70.7	402.70
2017	9	11	12	36	-59.3	399.65
2017	9	11	13	43	-58.7	399.20
2017	9	11	14	51	-70.8	402.75
2017	9	11	16	3	-93.5	404.16
2017	9	11	17	12	-88.9	404.91
2017	9	11	18	20	-88.6	405.01
2017	9	11	19	30	-67.6	402.58
2017	9	11	20	41	-59.0	401.31
2017	9	11	21	49	-61.6	400.96
2017	9	11	22	58	-74.2	401.45
2017	9	12	0	10	-62.9	400.95
2017	9	12	1	18	-60.0	400.58
2017	9	12	2	25	-55.3	399.92
2017	9	12	3	39	-50.4	399.87
2017	9	12	4	47	-53.7	399.47
2017	9	12	5	54	-56.6	399.62
2017	9	12	7	6	-55.7	400.50
2017	9	12	8	16	-55.7	401.22
2017	9	12	9	23	-61.8	402.55
2017	9	12	10	33	-81.8	406.12
2017	9	12	11	44	-95.0	406.59
2017	9	12	12	52	-81.6	404.95
2017	9	12	14	0	-84.3	405.48
2017	9	12	15	13	-94.8	406.67
2017	9	12	16	21	-97.6	406.45
2017	9	12	17	29	-101.0	407.00
2017	9	12	18	42	-118.8	409.77
2017	9	12	19	50	-116.3	410.52
2017	9	12	20	58	-115.2	410.56
2017	9	12	22	9	-112.8	410.03
2017	9	12	23	19	-110.7	411.71
2017	9	13	0	27	-107.6	411.44
2017	9	13	1	36	-103.5	408.01
2017	9	13	2	48	-109.0	411.39
2017	9	13	3	56	-109.1	410.47
2017	9	13	5	3	-110.7	412.61
2017	9	13	6	17	-102.2	411.25
2017	9	13	7	24	-101.8	408.85
2017	9	13	8	32	-91.3	404.35
2017	9	13	9	44	-67.6	401.14
2017	9	13	10	53	-62.9	400.64
2017	9	13	12	1	-57.4	398.92
2017	9	13	13	11	-57.2	398.79
2017	9	13	14	22	-66.5	398.98
2017	9	13	15	30	-62.0	399.35
2017	9	13	16	39	-49.5	399.91
2017	9	13	17	51	-76.7	404.50
2017	9	13	18	59	-91.6	410.08
2017	9	13	20	6	-102.3	411.74
2017	9	13	21	20	-111.1	410.48
2017	9	13	22	28	-97.3	408.36
2017	9	13	23	35	-91.2	407.09
2017	9	14	0	47	-91.4	407.46
2017	9	14	1	57	-83.5	405.97
2017	9	14	3	4	-92.5	410.65
2017	9	14	4	14	-100.5	411.60
2017	9	14	5	26	-74.9	403.73
2017	9	14	6	33	-67.3	403.05
2017	9	14	7	41	-72.4	407.19
2017	9	14	8	55	-84.8	406.22
2017	9	14	10	2	-62.8	399.76
2017	9	14	11	10	-49.9	397.62
2017	9	14	12	23	-42.8	397.44
2017	9	14	13	31	-39.9	396.67
2017	9	14	14	39	-38.2	396.37
2017	9	14	15	50	-29.6	395.61
2017	9	14	17	0	-44.7	397.60
2017	9	14	18	8	-61.3	400.26
2017	9	14	19	17	-68.0	404.38
2017	9	14	20	29	-79.8	408.73
2017	9	14	21	37	-79.7	408.88
2017	9	14	22	44	-79.4	409.72
2017	9	14	23	58	-83.7	405.15
2017	9	15	1	6	-92.0	407.61
2017	9	15	2	13	-80.4	405.54
2017	9	15	3	25	-79.5	405.60
2017	9	15	4	35	-91.9	407.64
2017	9	15	5	42	-100.1	409.61
2017	9	15	6	52	-99.8	408.89
2017	9	15	8	4	-88.1	407.09
2017	9	15	9	11	-65.1	402.79
2017	9	15	10	20	-39.1	398.15
2017	9	15	11	33	-33.5	395.94
2017	9	15	12	40	-45.8	396.90
2017	9	15	13	48	-51.5	396.53
2017	9	15	15	1	-42.9	397.97
2017	9	15	16	9	-56.4	400.37
2017	9	15	17	17	-71.0	402.99
2017	9	15	18	28	-77.4	404.56
2017	9	15	19	38	-77.1	403.99
2017	9	15	20	46	-71.2	403.29
2017	9	15	21	55	-66.5	402.87
2017	9	15	23	7	-64.3	402.55
2017	9	16	0	15	-60.5	401.67
2017	9	16	1	22	-58.9	401.65
2017	9	16	2	36	-70.7	401.40
2017	9	16	3	44	-66.4	401.19
2017	9	16	4	51	-68.2	401.90
2017	9	16	6	4	-67.1	401.82
2017	9	16	7	13	-50.1	399.15
2017	9	16	8	20	-42.1	397.89
2017	9	16	9	31	-51.4	398.06
2017	9	16	10	42	-45.3	397.92
2017	9	16	11	49	-47.8	398.44
2017	9	16	12	58	-47.9	398.78
2017	9	16	14	11	-54.5	399.47
2017	9	16	15	18	-53.9	399.00
2017	9	16	16	26	-49.8	398.83
2017	9	16	17	39	-62.9	400.67
2017	9	16	18	47	-62.2	400.84
2017	9	16	19	55	-59.8	400.98
2017	9	16	21	6	-56.7	401.24
2017	9	16	22	16	-57.8	400.78
2017	9	16	23	24	-55.2	400.66
2017	9	17	0	34	-55.5	400.72
2017	9	17	1	45	-57.6	400.66
2017	9	17	2	53	-55.7	400.97
2017	9	17	4	1	-50.7	401.44
2017	9	17	5	14	-63.4	400.90
2017	9	17	6	22	-59.7	400.28
2017	9	17	7	29	-53.0	399.49
2017	9	17	8	42	-52.2	399.82
2017	9	17	9	51	-48.1	398.78
2017	9	17	10	58	-47.1	398.91
2017	9	17	12	9	-59.3	399.28
2017	9	17	13	20	-52.7	399.31
2017	9	17	14	27	-53.3	399.94
2017	9	17	15	36	-58.2	400.42
2017	9	17	16	49	-55.3	401.13
2017	9	17	17	56	-64.2	401.08
2017	9	17	19	4	-70.8	400.75
2017	9	17	20	18	-64.6	401.14
2017	9	17	21	25	-58.5	401.06
2017	9	17	22	33	-57.1	400.97
2017	9	17	23	45	-54.4	401.46
2017	9	18	0	54	-70.2	401.20
2017	9	18	2	2	-69.3	401.37
2017	9	18	3	12	-58.4	401.60
2017	9	18	4	23	-65.2	402.76
2017	9	18	5	31	-78.0	404.07
2017	9	18	6	39	-70.5	404.37
2017	9	18	7	52	-88.2	404.69
2017	9	18	9	0	-100.2	405.99
2017	9	18	10	7	-75.6	402.02
2017	9	18	11	20	-54.6	399.46
2017	9	18	12	29	-52.2	398.91
2017	9	18	13	36	-55.4	399.57
2017	9	18	14	48	-66.3	400.09
2017	9	18	15	57	-44.0	400.04
2017	9	18	17	5	-58.2	401.70
2017	9	18	18	15	-74.1	403.15
2017	9	18	19	26	-74.2	404.04
2017	9	18	20	34	-74.4	403.86
2017	9	18	21	42	-80.6	403.53
2017	9	18	22	55	-81.7	404.36
2017	9	19	0	3	-90.7	405.81
2017	9	19	1	11	-95.1	407.89
2017	9	19	2	23	-95.5	409.52
2017	9	19	3	32	-111.5	410.48
2017	9	19	4	39	-121.6	411.22
2017	9	19	5	50	-112.4	410.77
2017	9	19	7	1	-113.4	410.72
2017	9	19	8	8	-109.5	410.30
2017	9	19	9	17	-93.9	407.76
2017	9	20	6	17	-100.7	408.04
2017	9	20	10	2	-109.3	407.82
2017	9	20	11	9	-94.0	405.10
2017	9	20	12	23	-82.5	404.16
2017	9	20	13	31	-90.5	404.20
2017	9	20	14	38	-105.0	406.19
2017	9	20	15	50	-99.5	407.05
2017	9	20	17	0	-106.2	407.93
2017	9	20	18	7	-109.4	408.67
2017	9	20	19	18	-107.2	409.09
2017	9	20	20	29	-110.9	409.29
2017	9	20	21	36	-113.4	410.21
2017	9	20	22	45	-135.7	414.61
2017	9	20	23	58	-150.8	417.04
2017	9	21	1	5	-135.1	414.20
2017	9	21	2	13	-138.5	415.94
2017	9	21	3	26	-141.3	414.47
2017	9	21	4	34	-124.5	412.82
2017	9	21	5	42	-123.2	414.49
2017	9	21	6	53	-119.5	412.02
2017	9	21	8	3	-109.9	410.35
2017	9	21	9	11	-91.9	405.26
2017	9	21	10	20	-78.9	402.84
2017	9	21	11	32	-65.0	401.85
2017	9	21	12	40	-57.9	400.00
2017	9	21	13	47	-94.9	406.72
2017	9	21	15	1	-79.8	404.90
2017	9	21	16	9	-77.4	403.67
2017	9	21	17	16	-71.7	402.82
2017	9	21	18	29	-77.7	403.12
2017	9	21	19	38	-78.3	403.56
2017	9	21	20	45	-85.9	405.91
2017	9	21	21	56	-92.5	409.02
2017	9	21	23	7	-90.7	406.94
2017	9	22	0	14	-83.5	404.39
2017	9	22	1	23	-85.2	405.88
2017	9	22	2	36	-90.6	407.71
2017	9	22	3	43	-78.3	405.58
2017	9	22	4	51	-85.1	405.75
2017	9	22	6	4	-99.8	407.30
2017	9	22	7	12	-85.3	405.21
2017	9	22	8	20	-71.2	402.44
2017	9	22	9	31	-66.7	402.15
2017	9	22	10	41	-75.0	403.62
2017	9	22	11	49	-84.3	405.44
2017	9	22	12	59	-94.0	406.16
2017	9	22	14	10	-84.7	406.52
2017	9	22	15	18	-70.6	404.07
2017	9	22	16	26	-59.3	403.26
2017	9	22	17	39	-64.6	403.45
2017	9	22	18	47	-70.2	402.77
2017	9	22	19	54	-69.5	402.02
2017	9	22	21	7	-68.5	402.58
2017	9	22	22	16	-68.4	402.59
2017	9	22	23	23	-64.3	402.20
2017	9	23	0	34	-61.0	402.21
2017	9	23	1	45	-63.3	401.55
2017	9	23	2	52	-63.7	401.35
2017	9	23	4	1	-62.5	401.61
2017	9	23	5	14	-69.5	402.17
2017	9	23	6	21	-71.5	403.80
2017	9	23	7	29	-68.8	404.58
2017	9	23	8	42	-77.4	402.51
2017	9	23	9	50	-67.6	401.18
2017	9	23	10	58	-73.1	402.53
2017	9	23	12	10	-68.0	402.30
2017	9	23	13	19	-66.0	401.78
2017	9	23	14	27	-60.1	401.15
2017	9	23	15	37	-66.1	400.91
2017	9	23	16	48	-59.7	401.37
2017	9	23	17	56	-62.5	401.52
2017	9	23	19	4	-66.7	401.68
2017	9	23	20	17	-63.8	402.82
2017	9	23	21	25	-75.5	403.58
2017	9	23	22	32	-81.4	406.10
2017	9	23	23	45	-110.0	418.16
2017	9	24	0	54	-94.0	408.98
2017	9	24	2	1	-118.8	415.82
2017	9	24	3	13	-101.7	408.71
2017	9	24	4	23	-117.0	411.84
2017	9	24	5	30	-119.3	411.86
2017	9	24	6	40	-101.7	408.82
2017	9	24	7	52	-89.2	405.85
2017	9	24	8	59	-105.8	409.67
2017	9	24	10	7	-83.3	405.68
2017	9	24	11	20	-102.3	406.46
2017	9	24	12	28	-101.4	406.73
2017	9	24	13	36	-98.8	406.90
2017	9	24	14	48	-98.7	406.79
2017	9	24	15	57	-95.7	407.59
2017	9	24	17	5	-101.2	408.35
2017	9	24	18	15	-111.0	408.32
2017	9	24	19	26	-105.9	408.69
2017	9	24	20	34	-107.4	410.11
2017	9	24	21	42	-109.0	410.03
2017	9	24	22	55	-94.5	408.17
2017	9	25	0	3	-107.9	412.41
2017	9	25	1	10	-115.6	412.80
2017	9	25	2	24	-108.0	409.57
2017	9	25	3	31	-128.4	415.11
2017	9	25	4	39	-148.6	420.39
2017	9	25	5	51	-144.3	418.27
2017	9	25	7	0	-144.0	415.54
2017	9	25	8	18	-139.9	413.87
2017	9	25	9	55	-128.7	412.77
2017	9	25	11	6	-129.3	412.74
2017	9	25	12	14	-131.4	412.91
2017	9	25	13	22	-127.8	412.37
2017	9	25	14	35	-139.7	412.66
2017	9	25	15	43	-129.3	412.79
2017	9	25	16	50	-144.2	416.77
2017	9	25	18	3	-156.7	417.61
2017	9	25	19	12	-150.6	416.66
2017	9	25	20	19	-137.7	419.40
2017	9	25	21	31	-125.7	413.72
2017	9	25	22	41	-105.3	409.64
2017	9	25	23	48	-100.6	408.36
2017	9	26	0	58	-107.4	409.22
2017	9	26	2	10	-99.7	408.47
2017	9	26	3	17	-112.3	410.31
2017	9	26	4	25	-115.3	409.69
2017	9	26	5	39	-106.4	408.50
2017	9	26	6	46	-99.8	407.32
2017	9	26	7	54	-93.5	405.59
2017	9	26	9	6	-107.1	410.00
2017	9	26	10	15	-123.9	410.73
2017	9	26	11	23	-109.4	408.15
2017	9	26	12	33	-94.9	406.10
2017	9	26	13	44	-99.6	407.56
2017	9	26	14	52	-106.0	407.91
2017	9	26	16	0	-95.8	408.15
2017	9	26	17	13	-125.8	410.86
2017	9	26	18	21	-140.9	413.67
2017	9	26	19	28	-136.6	413.43
2017	9	26	20	42	-131.5	413.01
2017	9	26	21	50	-122.9	412.95
2017	9	26	22	57	-128.9	414.01
2017	9	27	0	9	-156.6	423.61
2017	9	27	1	19	-130.7	414.90
2017	9	27	2	26	-132.0	414.76
2017	9	27	3	36	-127.9	413.12
2017	9	27	4	48	-134.0	416.16
2017	9	27	5	55	-147.5	418.12
2017	9	27	7	3	-151.2	415.65
2017	9	27	8	17	-150.9	416.71
2017	9	27	9	24	-130.1	412.70
2017	9	27	10	32	-129.6	412.53
2017	9	27	11	44	-157.3	417.63
2017	9	27	12	53	-170.6	418.68
2017	9	27	14	1	-140.5	414.34
2017	9	27	15	12	-119.5	411.97
2017	9	27	16	22	-104.8	408.15
2017	9	27	17	30	-86.3	405.38
2017	9	27	18	39	-79.2	405.24
2017	9	27	19	51	-88.3	404.81
2017	9	27	20	59	-94.8	406.96
2017	9	27	22	6	-95.1	407.80
2017	9	27	23	20	-115.7	411.51
2017	9	28	0	28	-111.8	411.14
2017	9	28	1	35	-115.3	412.74
2017	9	28	2	47	-130.8	413.15
2017	9	28	3	56	-128.7	413.33
2017	9	28	5	4	-135.1	414.11
2017	9	28	6	14	-153.8	417.44
2017	9	28	7	25	-103.2	409.10
2017	9	28	8	33	-102.4	408.27
2017	9	28	9	41	-106.2	407.48
2017	9	28	10	54	-97.4	407.62
2017	9	28	12	2	-96.5	407.65
2017	9	28	13	10	-101.8	407.99
2017	9	28	14	23	-96.3	408.11
2017	9	28	15	31	-97.3	406.83
2017	9	28	16	39	-92.4	405.42
2017	9	28	17	50	-90.6	405.68
2017	9	28	19	0	-100.1	408.06
2017	9	28	20	8	-107.4	409.54
2017	9	28	21	17	-92.6	408.72
2017	9	28	22	29	-104.0	409.05
2017	9	28	23	36	-110.3	410.17
2017	9	29	0	44	-110.2	410.21
2017	9	29	1	58	-105.8	408.61
2017	9	29	3	5	-95.9	407.56
2017	9	29	4	13	-96.4	408.57
2017	9	29	5	25	-102.9	409.26
2017	9	29	6	34	-97.9	407.98
2017	9	29	7	42	-97.9	408.27
2017	9	29	8	53	-98.4	409.50
2017	9	29	10	3	-95.7	408.06
2017	9	29	11	11	-100.1	407.65
2017	9	29	12	20	-89.0	404.64
2017	9	29	13	32	-95.0	405.43
2017	9	29	14	40	-98.7	406.07
2017	9	29	15	47	-100.6	407.76
2017	9	29	17	1	-105.9	410.39
2017	9	29	18	9	-116.7	410.75
2017	9	29	19	16	-119.2	410.58
2017	9	29	20	28	-114.7	413.07
2017	9	29	21	38	-110.1	412.24
2017	9	29	22	45	-105.0	410.85
2017	9	29	23	55	-96.7	410.50
2017	9	30	1	7	-118.9	414.42
2017	9	30	2	14	-109.9	412.71
2017	9	30	3	23	-106.1	413.28
2017	9	30	4	36	-110.4	411.50
2017	9	30	5	43	-110.1	409.06
2017	9	30	6	51	-111.2	409.99
2017	9	30	8	4	-101.4	407.97
2017	9	30	9	12	-86.1	405.74
2017	9	30	10	20	-82.8	404.06
2017	9	30	11	31	-105.0	407.79
2017	9	30	12	41	-80.4	404.66
2017	9	30	13	49	-85.4	406.10
2017	9	30	14	58	-89.0	405.68
2017	9	30	16	10	-90.5	406.20
2017	9	30	17	18	-95.9	407.19
2017	9	30	18	25	-112.4	414.94
2017	9	30	19	39	-109.4	415.26
2017	9	30	20	47	-113.1	414.13
2017	9	30	21	54	-100.1	408.85
2017	9	30	23	7	-101.2	409.19
2017	10	1	0	16	-102.6	410.69
2017	10	1	1	23	-106.8	411.38
2017	10	1	2	34	-101.3	411.05
2017	10	1	3	45	-111.6	412.14
2017	10	1	4	52	-122.7	415.27
2017	10	1	6	1	-130.9	415.78
2017	10	1	7	14	-114.5	411.71
2017	10	1	8	21	-107.0	410.17
2017	10	1	9	29	-116.6	412.19
2017	10	1	10	42	-107.1	408.99
2017	10	1	11	50	-116.9	410.76
2017	10	1	12	58	-128.7	413.11
2017	10	1	14	9	-129.3	413.17
2017	10	1	15	19	-108.6	411.03
2017	10	1	16	27	-102.5	409.66
2017	10	1	17	37	-123.6	410.71
2017	10	1	18	48	-109.8	409.35
2017	10	1	19	56	-116.2	410.04
2017	10	1	21	4	-120.0	411.22
2017	10	1	22	17	-116.0	412.30
2017	10	1	23	25	-116.2	411.99
2017	10	2	0	32	-127.3	412.94
2017	10	2	1	45	-136.6	414.95
2017	10	2	2	54	-154.4	417.21
2017	10	2	4	1	-151.1	417.14
2017	10	2	5	12	-144.8	417.13
2017	10	2	6	23	-162.8	417.34
2017	10	2	7	30	-159.4	416.65
2017	10	2	8	39	-146.5	415.32
2017	10	2	12	9	-132.1	411.00
2017	10	2	13	35	-148.2	413.78
2017	10	2	14	43	-147.4	414.60
2017	10	2	15	56	-153.1	413.78
2017	10	2	17	4	-147.5	413.58
2017	10	2	18	12	-139.7	412.88
2017	10	2	19	24	-127.1	411.30
2017	10	2	20	33	-135.8	413.81
2017	10	2	21	41	-157.1	418.26
2017	10	2	22	51	-152.3	415.15
2017	10	3	0	2	-160.6	416.97
2017	10	3	1	10	-167.3	418.48
2017	10	3	2	18	-197.3	422.60
2017	10	3	3	31	-184.7	421.04
2017	10	3	4	39	-176.7	419.30
2017	10	3	5	46	-171.4	419.75
2017	10	3	6	59	-175.7	425.64
2017	10	3	8	8	-153.7	418.50
2017	10	3	9	15	-122.4	411.42
2017	10	3	10	26	-99.1	408.52
2017	10	3	11	37	-107.2	408.09
2017	10	3	12	44	-110.7	409.27
2017	10	3	13	54	-106.7	408.30
2017	10	3	15	5	-104.3	408.19
2017	10	3	16	13	-101.0	407.93
2017	10	3	17	21	-89.6	407.60
2017	10	3	18	34	-105.6	408.62
2017	10	3	19	42	-106.8	409.58
2017	10	3	20	50	-111.8	410.55
2017	10	3	22	2	-105.9	410.09
2017	10	3	23	11	-105.2	410.27
2017	10	4	0	19	-98.3	409.10
2017	10	4	1	29	-100.8	408.56
2017	10	4	2	40	-100.8	409.29
2017	10	4	3	48	-104.5	409.87
2017	10	4	4	56	-104.0	409.51
2017	10	4	6	9	-110.6	410.06
2017	10	4	7	16	-112.3	409.16
2017	10	4	8	24	-108.1	411.49
2017	10	4	9	38	-104.0	409.65
2017	10	4	10	45	-80.4	404.16
2017	10	4	11	53	-92.1	406.78
2017	10	4	13	5	-88.0	406.25
2017	10	4	14	14	-92.7	406.09
2017	10	4	15	22	-77.6	404.13
2017	10	4	16	32	-76.5	404.56
2017	10	4	17	43	-91.5	405.93
2017	10	4	18	51	-98.0	409.81
2017	10	4	19	59	-90.3	407.67
2017	10	4	21	12	-108.6	411.84
2017	10	4	22	20	-114.6	412.42
2017	10	4	23	27	-121.8	415.09
2017	10	5	0	40	-108.8	408.94
2017	10	5	1	49	-111.4	410.48
2017	10	5	2	56	-100.5	408.08
2017	10	5	4	7	-98.0	407.57
2017	10	5	5	18	-99.1	407.33
2017	10	5	6	25	-99.7	407.10
2017	10	5	7	35	-90.9	405.39
2017	10	5	8	47	-87.0	405.34
2017	10	5	9	54	-85.9	404.48
2017	10	5	11	2	-79.3	402.88
2017	10	5	12	16	-72.4	402.23
2017	10	5	13	23	-71.1	401.26
2017	10	5	14	31	-67.6	400.73
2017	10	5	15	43	-63.9	402.81
2017	10	5	16	52	-78.7	403.45
2017	10	5	18	0	-83.5	404.14
2017	10	5	19	10	-87.4	404.03
2017	10	5	20	21	-92.8	405.54
2017	10	5	21	29	-93.8	407.11
2017	10	5	22	37	-87.5	405.62
2017	10	5	23	50	-90.2	405.25
2017	10	6	0	58	-91.7	405.93
2017	10	6	2	5	-95.9	406.55
2017	10	6	3	19	-102.7	407.25
2017	10	6	4	27	-99.8	407.17
2017	10	6	5	34	-91.7	406.17
2017	10	6	6	46	-87.0	405.17
2017	10	6	7	56	-74.2	402.56
2017	10	6	9	3	-66.6	401.66
2017	10	6	10	13	-65.9	402.03
2017	10	6	11	25	-60.9	401.58
2017	10	6	12	32	-75.5	402.42
2017	10	6	13	40	-83.3	403.36
2017	10	6	14	54	-87.8	404.61
2017	10	6	16	1	-90.3	405.47
2017	10	6	17	9	-91.8	405.79
2017	10	6	18	21	-90.6	406.59
2017	10	6	19	30	-99.5	406.75
2017	10	6	20	38	-103.5	407.21
2017	10	6	21	48	-101.9	407.34
2017	10	6	22	59	-101.5	406.86
2017	10	7	0	7	-96.3	406.35
2017	10	7	1	16	-85.4	406.19
2017	10	7	2	28	-99.7	405.72
2017	10	7	3	36	-95.3	405.94
2017	10	7	4	43	-81.7	405.81
2017	10	7	5	57	-99.0	405.89
2017	10	7	7	5	-97.1	405.67
2017	10	7	8	12	-108.3	405.69
2017	10	7	9	24	-78.0	404.64
2017	10	7	10	34	-86.3	404.76
2017	10	7	11	41	-89.7	404.77
2017	10	7	12	51	-93.0	404.79
2017	10	7	14	3	-88.5	404.97
2017	10	7	15	10	-91.7	405.13
2017	10	7	16	18	-98.5	405.94
2017	10	7	17	32	-116.2	408.51
2017	10	7	18	39	-125.6	410.21
2017	10	7	19	47	-120.6	411.53
2017	10	7	21	0	-109.6	409.30
2017	10	7	22	8	-111.3	410.18
2017	10	7	23	16	-118.8	409.89
2017	10	8	0	27	-135.6	415.15
2017	10	8	1	37	-144.9	416.52
2017	10	8	2	45	-129.1	411.31
2017	10	8	3	54	-124.9	411.18
2017	10	8	5	6	-136.4	411.80
2017	10	8	6	14	-126.4	410.77
2017	10	8	7	21	-120.2	410.41
2017	10	8	8	35	-113.0	409.55
2017	10	8	9	43	-121.3	412.07
2017	10	8	10	50	-118.2	411.12
2017	10	8	12	2	-118.8	408.97
2017	10	8	13	12	-117.9	408.85
2017	10	8	14	19	-112.1	408.14
2017	10	8	15	30	-90.2	407.54
2017	10	8	16	41	-108.4	410.32
2017	10	8	17	48	-128.6	410.18
2017	10	8	18	57	-120.9	408.92
2017	10	8	20	10	-119.3	409.50
2017	10	8	21	17	-122.3	410.98
2017	10	8	22	25	-121.0	411.34
2017	10	8	23	38	-172.6	429.34
2017	10	9	0	46	-138.4	415.73
2017	10	9	1	54	-115.2	409.17
2017	10	9	3	5	-126.3	411.08
2017	10	9	4	15	-130.7	412.04
2017	10	9	5	23	-111.4	408.96
2017	10	9	6	32	-113.8	411.67
2017	10	9	7	44	-129.6	410.72
2017	10	9	8	52	-120.3	409.31
2017	10	9	10	0	-106.5	407.78
2017	10	9	11	13	-122.3	409.51
2017	10	9	12	21	-137.3	412.86
2017	10	9	13	28	-108.9	408.94
2017	10	9	14	41	-115.1	409.64
2017	10	9	15	49	-105.0	408.73
2017	10	9	16	57	-103.9	408.69
2017	10	9	18	8	-112.7	408.66
2017	10	9	19	18	-109.3	409.26
2017	10	9	20	26	-121.8	409.76
2017	10	9	21	35	-151.2	414.03
2017	10	9	22	47	-155.8	419.00
2017	10	9	23	55	-153.5	418.65
2017	10	10	1	3	-134.4	414.77
2017	10	10	2	16	-131.0	413.80
2017	10	10	3	24	-137.6	414.65
2017	10	10	4	31	-134.8	416.35
2017	10	10	5	43	-129.0	415.31
2017	10	10	6	53	-138.5	420.33
2017	10	10	8	0	-123.7	413.73
2017	10	10	9	11	-121.0	411.87
2017	10	10	12	15	-112.9	408.08
2017	10	10	13	52	-108.9	407.50
2017	10	10	15	0	-106.2	407.59
2017	10	10	16	13	-122.7	407.81
2017	10	10	17	20	-143.0	412.46
2017	10	10	18	28	-117.9	409.10
2017	10	10	19	41	-128.0	411.76
2017	10	10	20	49	-122.1	412.27
2017	10	10	21	57	-129.8	413.02
2017	10	10	23	8	-133.6	412.12
2017	10	11	0	18	-115.0	410.98
2017	10	11	1	26	-117.4	410.83
2017	10	11	2	36	-120.6	410.60
2017	10	11	3	47	-122.1	411.72
2017	10	11	4	55	-122.4	411.95
2017	10	11	6	3	-124.5	411.19
2017	10	11	7	16	-121.5	411.13
2017	10	11	8	24	-118.2	410.49
2017	10	11	9	32	-116.4	409.59
2017	10	11	10	44	-105.8	409.04
2017	10	11	11	53	-99.4	407.52
2017	10	11	13	0	-99.1	407.12
2017	10	11	14	11	-94.7	407.49
2017	10	11	15	22	-99.7	408.11
2017	10	11	16	29	-108.7	408.90
2017	10	11	17	38	-112.4	409.17
2017	10	11	18	51	-109.4	408.34
2017	10	11	19	58	-115.3	407.92
2017	10	11	21	6	-121.5	410.19
2017	10	11	22	20	-138.1	415.95
2017	10	11	23	27	-139.2	416.69
2017	10	12	0	35	-136.5	415.73
2017	10	12	1	47	-156.7	417.55
2017	10	12	2	56	-166.0	418.82
2017	10	12	4	4	-187.0	421.63
2017	10	12	5	14	-182.4	421.42
2017	10	12	6	25	-184.4	422.35
2017	10	12	7	33	-175.7	420.79
2017	10	12	8	41	-131.8	411.29
2017	10	12	9	54	-127.0	410.02
2017	10	12	11	2	-109.1	406.93
2017	10	12	12	9	-104.8	406.13
2017	10	12	13	22	-99.8	406.81
2017	10	12	14	31	-109.3	407.77
2017	10	12	15	38	-110.6	407.74
2017	10	12	16	49	-112.7	408.34
2017	10	12	18	0	-120.0	410.73
2017	10	12	19	7	-115.1	408.75
2017	10	12	20	17	-115.1	408.75
2017	10	12	21	29	-112.6	408.07
2017	10	12	22	36	-116.1	408.38
2017	10	12	23	44	-118.7	408.96
2017	10	13	0	58	-118.9	408.84
2017	10	13	2	5	-110.8	408.83
2017	10	13	3	13	-109.6	410.17
2017	10	13	4	25	-112.7	409.40
2017	10	13	5	34	-131.0	411.64
2017	10	13	6	42	-125.7	411.70
2017	10	13	7	52	-106.2	408.62
2017	10	13	9	3	-108.0	407.25
2017	10	13	10	11	-91.3	404.01
2017	10	13	11	19	-111.7	407.50
2017	10	13	12	32	-116.9	408.62
2017	10	13	13	40	-109.7	406.56
2017	10	13	14	47	-80.9	401.60
2017	10	13	16	1	-71.0	401.85
2017	10	13	17	9	-88.9	403.48
2017	10	13	18	16	-102.4	409.87
2017	10	13	19	28	-86.2	405.23
2017	10	13	20	38	-87.6	404.99
2017	10	13	21	45	-93.1	405.61
2017	10	13	22	55	-108.1	408.51
2017	10	14	0	7	-113.0	408.84
2017	10	14	1	14	-117.5	409.29
2017	10	14	2	22	-129.6	411.19
2017	10	14	3	36	-134.9	412.06
2017	10	14	4	43	-129.8	412.24
2017	10	14	5	51	-127.5	411.92
2017	10	14	7	3	-119.5	409.64
2017	10	14	8	12	-100.7	407.10
2017	10	14	9	20	-97.6	406.08
2017	10	14	10	30	-94.5	405.46
2017	10	14	11	41	-98.9	406.07
2017	10	14	12	49	-102.2	405.17
2017	10	14	13	58	-110.6	405.32
2017	10	14	15	10	-101.3	405.39
2017	10	14	16	18	-105.8	406.84
2017	10	14	17	25	-110.4	407.24
2017	10	14	18	39	-106.8	407.36
2017	10	14	19	47	-107.7	408.16
2017	10	14	20	54	-111.5	409.72
2017	10	14	22	6	-114.0	410.46
2017	10	14	23	15	-106.8	407.54
2017	10	15	0	23	-114.9	408.05
2017	10	15	1	33	-119.0	409.19
2017	10	15	2	44	-123.5	409.12
2017	10	15	3	52	-129.6	410.62
2017	10	15	5	0	-133.8	412.31
2017	10	15	6	13	-136.6	413.51
2017	10	15	7	21	-123.2	410.53
2017	10	15	8	29	-124.4	410.79
2017	10	15	9	42	-125.6	409.77
2017	10	15	10	50	-133.4	412.55
2017	10	15	11	58	-121.4	410.68
2017	10	15	13	9	-113.1	408.47
2017	10	15	14	19	-116.8	409.49
2017	10	15	15	27	-118.3	409.61
2017	10	15	16	36	-124.6	409.72
2017	10	15	17	48	-133.6	411.55
2017	10	15	18	56	-124.0	411.32
2017	10	15	20	3	-124.7	410.15
2017	10	15	21	17	-123.0	409.99
2017	10	15	22	25	-116.8	408.37
2017	10	15	23	32	-112.0	409.00
2017	10	16	0	44	-111.8	409.45
2017	10	16	1	53	-118.1	409.49
2017	10	16	3	1	-122.6	409.88
2017	10	16	4	12	-116.5	409.63
2017	10	16	5	22	-123.5	409.49
2017	10	16	6	30	-119.9	409.21
2017	10	16	7	39	-111.3	408.49
2017	10	16	8	51	-89.9	404.67
2017	10	16	11	3	-88.5	403.97
2017	10	16	13	24	-106.2	407.21
2017	10	16	14	38	-106.5	407.69
2017	10	16	15	46	-109.1	407.35
2017	10	16	16	53	-108.3	407.53
2017	10	16	18	5	-109.3	407.88
2017	10	16	19	15	-114.6	408.46
2017	10	16	20	22	-120.3	409.12
2017	10	16	21	32	-119.6	409.63
2017	10	16	22	44	-117.5	409.02
2017	10	16	23	51	-113.3	409.43
2017	10	17	1	0	-120.4	410.10
2017	10	17	2	13	-130.4	410.45
2017	10	17	3	20	-134.1	410.97
2017	10	17	4	28	-125.2	411.62
2017	10	17	5	41	-126.1	410.62
2017	10	17	6	49	-125.4	409.97
2017	10	17	8	31	-128.7	412.34
2017	10	17	11	59	-112.5	406.69
2017	10	17	13	9	-113.9	406.27
2017	10	17	14	17	-106.7	406.03
2017	10	17	15	26	-105.9	405.95
2017	10	17	16	38	-116.3	407.85
2017	10	17	17	46	-121.7	408.91
2017	10	17	18	54	-119.7	409.22
2017	10	17	20	7	-126.3	410.88
2017	10	17	21	15	-131.0	412.30
2017	10	17	22	23	-125.0	410.69
2017	10	17	23	35	-125.3	410.96
2017	10	18	0	44	-133.3	412.47
2017	10	18	1	52	-130.6	411.83
2017	10	18	3	2	-129.4	411.47
2017	10	18	4	13	-126.1	411.12
2017	10	18	5	20	-130.8	411.10
2017	10	18	6	29	-130.0	409.71
2017	10	18	7	42	-112.9	408.23
2017	10	18	8	49	-109.7	407.55
2017	10	18	9	57	-115.4	408.76
2017	10	18	11	10	-117.3	408.40
2017	10	18	12	18	-110.6	408.26
2017	10	18	13	26	-109.6	407.87
2017	10	18	14	37	-111.3	408.51
2017	10	18	15	47	-113.4	409.91
2017	10	18	16	55	-119.5	410.78
2017	10	18	18	5	-121.5	410.36
2017	10	18	19	16	-128.8	410.28
2017	10	18	20	24	-132.4	410.61
2017	10	18	21	32	-126.4	410.64
2017	10	18	22	45	-122.8	411.29
2017	10	18	23	53	-122.8	411.34
2017	10	19	1	0	-117.8	410.88
2017	10	19	2	13	-127.9	411.34
2017	10	19	3	22	-128.8	411.30
2017	10	19	4	29	-134.1	411.45
2017	10	19	5	40	-134.8	411.84
2017	10	19	6	51	-134.8	411.42
2017	10	19	7	58	-131.0	411.12
2017	10	19	9	7	-123.1	409.48
2017	10	19	10	20	-115.5	407.76
2017	10	19	11	27	-109.0	407.91
2017	10	19	12	35	-110.1	407.93
2017	10	19	13	49	-115.5	407.03
2017	10	19	14	56	-111.5	407.67
2017	10	19	16	4	-120.5	409.24
2017	10	19	17	16	-127.5	410.10
2017	10	19	18	25	-128.6	411.01
2017	10	19	19	33	-126.0	410.54
2017	10	19	20	43	-118.0	409.67
2017	10	19	21	54	-126.5	410.35
2017	10	19	23	2	-129.8	410.86
2017	10	20	0	10	-128.0	410.12
2017	10	20	1	23	-115.5	410.35
2017	10	20	2	31	-121.9	410.91
2017	10	20	3	38	-132.3	411.09
2017	10	20	4	51	-130.9	411.26
2017	10	20	6	0	-133.4	411.09
2017	10	20	7	7	-123.4	410.19
2017	10	20	8	18	-111.5	410.17
2017	10	20	9	29	-122.8	409.98
2017	10	20	10	36	-127.3	409.26
2017	10	20	11	46	-116.4	408.88
2017	10	20	12	58	-120.7	408.46
2017	10	20	14	5	-119.8	408.60
2017	10	20	15	13	-116.6	409.14
2017	10	20	16	27	-118.0	409.07
2017	10	20	17	34	-117.8	408.83
2017	10	20	18	42	-117.6	409.18
2017	10	20	19	54	-121.2	409.15
2017	10	20	21	3	-121.2	409.14
2017	10	20	22	11	-123.0	409.48
2017	10	20	23	21	-124.1	408.82
2017	10	21	0	32	-123.1	409.02
2017	10	21	1	40	-122.0	409.32
2017	10	21	2	48	-126.1	409.45
2017	10	21	4	1	-129.4	409.77
2017	10	21	5	9	-133.4	409.96
2017	10	21	6	16	-130.3	410.17
2017	10	21	7	30	-110.8	408.93
2017	10	21	8	38	-120.2	407.52
2017	10	21	9	45	-110.2	405.05
2017	10	21	10	57	-95.7	404.77
2017	10	21	12	7	-97.5	403.57
2017	10	21	13	14	-99.3	403.72
2017	10	21	14	24	-103.2	404.69
2017	10	21	15	36	-108.4	405.85
2017	10	21	16	43	-110.0	406.98
2017	10	21	17	51	-115.4	407.87
2017	10	21	19	5	-115.2	407.13
2017	10	21	20	12	-109.9	407.58
2017	10	21	21	20	-108.6	407.72
2017	10	21	22	32	-113.0	407.80
2017	10	21	23	41	-112.8	407.56
2017	10	22	0	49	-107.6	407.39
2017	10	22	2	0	-115.3	407.27
2017	10	22	3	10	-116.2	407.13
2017	10	22	4	18	-111.4	406.93
2017	10	22	5	27	-114.7	406.93
2017	10	22	6	39	-118.3	407.70
2017	10	22	7	47	-119.7	407.05
2017	10	22	8	54	-113.8	406.32
2017	10	22	10	8	-110.3	406.62
2017	10	22	11	16	-114.0	407.68
2017	10	22	12	23	-117.8	408.72
2017	10	22	13	35	-121.8	409.60
2017	10	22	14	45	-158.2	412.41
2017	10	22	15	52	-173.5	416.37
2017	10	22	17	2	-157.5	415.28
2017	10	22	18	14	-133.3	413.38
2017	10	22	19	21	-129.3	411.61
2017	10	22	20	30	-135.8	411.68
2017	10	22	21	43	-157.6	411.95
2017	10	22	22	50	-135.7	411.46
2017	10	22	23	58	-126.3	410.54
2017	10	23	1	11	-114.2	410.78
2017	10	23	2	19	-126.0	411.64
2017	10	23	3	27	-136.4	412.21
2017	10	23	4	38	-131.3	410.67
2017	10	23	5	48	-130.1	410.31
2017	10	23	10	36	-113.7	411.08
2017	10	23	20	19	-99.9	411.30
2017	10	23	21	31	-126.3	412.00
2017	10	23	22	39	-137.6	413.73
2017	10	23	23	46	-151.1	417.56
2017	10	24	1	0	-148.1	413.46
2017	10	24	2	8	-140.0	412.33
2017	10	24	3	15	-140.4	412.57
2017	10	24	4	28	-139.0	412.66
2017	10	24	5	37	-134.9	412.27
2017	10	24	6	44	-145.0	417.42
2017	10	24	7	55	-145.8	417.08
2017	10	24	9	6	-141.9	414.83
2017	10	24	10	13	-137.7	412.55
2017	10	24	11	22	-134.7	412.38
2017	10	24	12	35	-136.0	410.78
2017	10	24	13	42	-137.7	410.61
2017	10	24	14	50	-132.2	410.76
2017	10	24	16	3	-133.5	410.53
2017	10	24	17	11	-138.7	411.70
2017	10	24	18	19	-135.5	412.29
2017	10	24	19	30	-142.4	412.72
2017	10	24	20	40	-147.1	414.05
2017	10	24	21	48	-143.0	413.56
2017	10	24	22	58	-166.8	419.10
2017	10	25	0	9	-167.2	418.08
2017	10	25	1	17	-163.0	417.36
2017	10	25	2	25	-153.8	413.88
2017	10	25	3	38	-161.4	415.00
2017	10	25	4	46	-178.5	420.98
2017	10	25	5	53	-172.6	418.52
2017	10	25	7	6	-165.3	417.78
2017	10	25	8	14	-149.8	413.60
2017	10	25	9	22	-130.5	410.62
2017	10	25	10	33	-124.3	409.46
2017	10	25	11	43	-118.5	407.62
2017	10	25	12	51	-119.1	408.42
2017	10	25	14	0	-118.1	408.90
2017	10	25	15	12	-118.8	407.49
2017	10	25	16	20	-120.6	407.97
2017	10	25	17	28	-118.7	407.82
2017	10	25	18	41	-118.4	408.07
2017	10	25	19	49	-123.1	408.67
2017	10	25	20	57	-139.2	410.94
2017	10	25	22	9	-131.3	410.00
2017	10	25	23	18	-129.9	410.42
2017	10	26	0	25	-128.3	410.94
2017	10	26	1	36	-131.9	411.46
2017	10	26	2	47	-132.9	411.25
2017	10	26	3	54	-140.2	411.57
2017	10	26	5	3	-136.5	411.19
2017	10	26	6	16	-130.4	410.83
2017	10	26	7	23	-123.5	410.08
2017	10	26	8	31	-118.1	408.55
2017	10	26	9	44	-129.2	409.44
2017	10	26	10	52	-132.3	410.73
2017	10	26	12	0	-132.0	411.25
2017	10	26	13	11	-137.9	413.48
2017	10	26	14	21	-131.4	411.46
2017	10	26	15	29	-125.8	410.02
2017	10	26	16	39	-118.8	409.76
2017	10	26	17	50	-126.8	409.05
2017	10	26	18	58	-128.2	409.70
2017	10	26	20	6	-132.5	410.25
2017	10	26	21	19	-132.6	410.79
2017	10	26	22	27	-131.7	411.61
2017	10	26	23	34	-131.2	411.62
2017	10	27	0	47	-147.8	413.51
2017	10	27	1	56	-143.1	416.42
2017	10	27	3	3	-165.1	424.82
2017	10	27	4	14	-148.7	415.07
2017	10	27	5	25	-175.8	424.32
2017	10	27	6	32	-183.7	428.12
2017	10	27	7	41	-166.7	420.12
2017	10	27	8	54	-158.8	416.69
2017	10	27	10	1	-148.5	414.99
2017	10	27	11	9	-148.9	414.58
2017	10	27	12	23	-146.0	413.47
2017	10	27	13	30	-151.3	413.98
2017	10	27	14	38	-146.5	413.12
2017	10	27	15	50	-134.8	412.66
2017	10	27	16	59	-147.5	414.39
2017	10	27	18	7	-148.5	414.80
2017	10	27	19	17	-149.3	414.96
2017	10	27	20	28	-162.3	415.39
2017	10	27	21	36	-169.5	415.83
2017	10	27	22	44	-160.0	415.40
2017	10	27	23	57	-152.0	414.43
2017	10	28	1	5	-146.6	414.20
2017	10	28	2	12	-151.8	414.55
2017	10	28	3	25	-153.3	414.18
2017	10	28	4	34	-144.7	413.49
2017	10	28	5	41	-143.0	412.69
2017	10	28	6	52	-133.8	411.48
2017	10	28	8	3	-126.3	410.30
2017	10	28	9	10	-128.9	409.89
2017	10	28	10	20	-131.6	409.44
2017	10	28	11	32	-128.6	409.95
2017	10	28	12	39	-133.1	410.27
2017	10	28	13	47	-134.0	410.85
2017	10	28	15	1	-130.2	411.36
2017	10	28	16	8	-132.3	411.09
2017	10	28	17	16	-130.9	410.63
2017	10	28	18	28	-131.4	410.50
2017	10	28	19	37	-129.5	410.31
2017	10	28	20	45	-131.0	410.02
2017	10	28	21	55	-129.1	410.09
2017	10	28	23	6	-130.0	409.56
2017	10	29	0	14	-127.6	409.61
2017	10	29	1	22	-126.1	410.09
2017	10	29	2	35	-140.2	412.46
2017	10	29	3	43	-157.9	416.11
2017	10	29	4	50	-162.9	417.65
2017	10	29	6	4	-174.9	419.90
2017	10	29	7	12	-197.6	436.79
2017	10	29	8	19	-274.3	466.86
2017	10	29	9	31	-125.1	412.18
2017	10	29	10	41	-120.9	410.29
2017	10	29	11	48	-117.7	408.76
2017	10	29	12	58	-119.9	408.06
2017	10	29	14	10	-120.8	409.07
2017	10	29	15	17	-121.3	409.16
2017	10	29	16	25	-130.8	410.85
2017	10	29	17	39	-130.3	411.79
2017	10	29	18	46	-125.4	410.29
2017	10	29	19	54	-136.9	411.66
2017	10	29	21	6	-148.8	415.79
2017	10	29	22	15	-134.2	411.12
2017	10	29	23	23	-136.2	411.65
2017	10	30	0	34	-148.2	413.35
2017	10	30	1	44	-135.5	414.11
2017	10	30	2	52	-119.5	412.01
2017	10	30	4	1	-121.9	411.29
2017	10	30	5	13	-122.1	411.06
2017	10	30	6	21	-121.8	412.10
2017	10	30	7	28	-128.8	413.29
2017	10	30	8	42	-126.9	412.09
2017	10	30	11	9	-119.6	409.72
2017	10	30	13	17	-126.4	409.41
2017	10	30	14	29	-115.4	409.44
2017	10	30	15	38	-122.0	409.11
2017	10	30	16	46	-127.3	409.60
2017	10	30	17	56	-109.0	411.39
2017	10	30	19	7	-123.6	411.53
2017	10	30	20	14	-125.7	411.64
2017	10	30	21	23	-132.2	412.26
2017	10	30	22	36	-132.1	411.54
2017	10	30	23	43	-127.8	410.61
2017	10	31	0	51	-128.4	411.01
2017	10	31	2	4	-135.5	411.51
2017	10	31	3	12	-138.0	412.33
2017	10	31	4	20	-133.8	411.49
2017	10	31	5	31	-144.0	411.66
2017	10	31	6	41	-147.2	412.12
2017	10	31	7	49	-136.2	411.86
2017	10	31	10	10	-123.5	409.64
2017	10	31	11	18	-117.6	408.72
2017	10	31	12	26	-122.5	408.14
2017	10	31	13	39	-125.0	408.48
2017	10	31	14	47	-122.5	408.79
2017	10	31	15	54	-125.0	409.60
2017	10	31	17	7	-128.0	410.24
2017	10	31	18	16	-131.2	410.12
2017	10	31	19	23	-133.2	410.46
2017	10	31	20	34	-138.1	412.39
2017	10	31	21	45	-140.2	411.85
2017	10	31	22	52	-137.4	412.91
2017	11	1	0	1	-137.2	412.80
2017	11	1	1	14	-141.7	412.73
2017	11	1	2	21	-145.5	413.66
2017	11	1	3	29	-137.4	413.31
2017	11	1	4	42	-137.3	412.29
2017	11	1	5	50	-144.8	412.30
2017	11	1	6	58	-139.1	411.52
2017	11	1	8	10	-130.8	409.97
2017	11	1	9	19	-138.0	410.63
2017	11	1	10	27	-152.6	412.91
2017	11	1	11	37	-139.7	410.47
2017	11	1	12	48	-158.8	414.09
2017	11	1	13	56	-156.1	412.89
2017	11	1	15	4	-137.7	410.01
2017	11	1	16	17	-153.5	412.37
2017	11	1	17	25	-157.4	412.37
2017	11	1	18	32	-145.0	411.76
2017	11	1	19	45	-145.3	412.19
2017	11	1	20	54	-139.9	410.52
2017	11	1	22	1	-142.2	410.82
2017	11	1	23	12	-153.8	413.16
2017	11	2	0	23	-156.8	414.00
2017	11	2	1	30	-157.5	414.96
2017	11	2	2	39	-154.0	415.26
2017	11	2	3	52	-155.5	415.32
2017	11	2	4	59	-155.7	416.00
2017	11	2	6	7	-155.2	415.37
2017	11	2	7	21	-150.8	413.89
2017	11	2	8	28	-153.7	414.71
2017	11	2	9	36	-156.5	414.28
2017	11	2	10	48	-169.0	415.73
2017	11	2	11	57	-172.3	416.19
2017	11	2	13	5	-167.0	416.00
2017	11	2	14	15	-159.5	416.24
2017	11	2	15	26	-153.4	415.74
2017	11	2	16	34	-158.8	416.02
2017	11	2	17	42	-162.8	416.43
2017	11	2	18	55	-164.9	416.73
2017	11	2	20	3	-165.9	417.31
2017	11	2	21	10	-166.3	417.24
2017	11	2	22	23	-164.4	416.44
2017	11	2	23	32	-159.1	414.87
2017	11	3	0	39	-157.7	414.56
2017	11	3	1	51	-160.6	413.87
2017	11	3	3	1	-159.0	413.76
2017	11	3	4	8	-149.6	413.37
2017	11	3	5	18	-141.4	412.94
2017	11	3	6	30	-143.5	411.52
2017	11	3	7	37	-144.5	411.28
2017	11	3	8	45	-140.4	410.77
2017	11	3	9	59	-137.7	410.24
2017	11	3	11	6	-134.0	410.63
2017	11	3	12	14	-136.2	411.04
2017	11	3	13	26	-147.0	410.28
2017	11	3	14	35	-138.8	409.98
2017	11	3	15	43	-126.3	409.67
2017	11	3	16	53	-139.0	410.67
2017	11	3	18	4	-136.8	410.92
2017	11	3	19	12	-134.7	410.69
2017	11	3	20	21	-146.7	411.83
2017	11	3	21	33	-148.1	415.77
2017	11	3	22	41	-194.2	432.43
2017	11	3	23	48	-202.8	434.89
2017	11	4	1	2	-165.9	422.54
2017	11	4	2	10	-177.2	418.68
2017	11	4	3	17	-180.8	418.06
2017	11	4	4	29	-171.8	416.82
2017	11	4	5	38	-180.3	418.46
2017	11	4	6	46	-172.8	419.08
2017	11	4	7	56	-159.8	418.01
2017	11	4	9	7	-158.7	416.89
2017	11	4	10	15	-152.1	415.52
2017	11	4	11	23	-148.4	415.80
2017	11	4	12	37	-155.9	416.85
2017	11	4	13	44	-148.0	415.29
2017	11	4	14	52	-147.1	414.71
2017	11	4	16	5	-158.9	416.00
2017	11	4	17	13	-164.4	417.34
2017	11	4	18	21	-155.0	415.42
2017	11	4	19	32	-161.9	419.31
2017	11	4	20	42	-157.0	417.83
2017	11	4	21	50	-150.9	416.21
2017	11	4	22	59	-155.2	419.06
2017	11	5	0	11	-152.0	417.15
2017	11	5	1	19	-146.9	414.78
2017	11	5	2	26	-138.9	413.67
2017	11	5	3	40	-139.8	413.67
2017	11	5	4	48	-144.1	414.05
2017	11	5	5	55	-148.1	413.44
2017	11	5	7	7	-148.8	416.59
2017	11	5	8	16	-132.5	412.06
2017	11	5	9	24	-130.7	412.49
2017	11	5	10	35	-128.4	412.10
2017	11	5	11	45	-121.9	410.83
2017	11	5	12	53	-120.9	409.61
2017	11	5	14	2	-127.1	410.46
2017	11	5	15	14	-132.8	412.34
2017	11	5	16	22	-130.2	411.59
2017	11	5	17	30	-138.8	412.78
2017	11	5	18	43	-148.4	412.90
2017	11	5	19	51	-154.1	413.99
2017	11	5	20	59	-154.5	414.49
2017	11	5	22	10	-153.0	414.51
2017	11	5	23	20	-153.6	414.92
2017	11	6	0	28	-156.7	415.02
2017	11	6	1	37	-149.8	414.46
2017	11	6	2	49	-146.5	414.06
2017	11	6	3	56	-146.7	413.97
2017	11	6	5	4	-138.8	413.61
2017	11	6	6	18	-146.4	413.98
2017	11	6	7	25	-152.2	413.50
2017	11	6	8	48	-149.0	412.59
2017	11	6	12	52	-138.9	411.16
2017	11	6	14	1	-130.1	410.96
2017	11	6	15	8	-149.1	412.97
2017	11	6	16	19	-152.4	413.17
2017	11	6	17	30	-163.0	414.94
2017	11	6	18	37	-162.8	414.80
2017	11	6	19	46	-144.1	412.15
2017	11	6	20	59	-143.6	412.85
2017	11	6	22	6	-144.7	412.85
2017	11	6	23	14	-154.0	413.82
2017	11	7	0	28	-143.4	412.27
2017	11	7	1	35	-144.0	411.87
2017	11	7	2	43	-142.9	412.62
2017	11	7	3	55	-154.9	414.58
2017	11	7	5	4	-154.5	413.17
2017	11	7	6	12	-152.2	413.30
2017	11	7	7	22	-149.7	414.31
2017	11	7	8	33	-147.7	412.25
2017	11	7	9	41	-138.5	411.43
2017	11	7	10	49	-137.4	411.96
2017	11	7	12	2	-145.0	410.66
2017	11	7	13	10	-145.1	411.29
2017	11	7	14	17	-159.2	414.03
2017	11	7	15	30	-146.5	413.38
2017	11	7	16	39	-147.6	413.58
2017	11	7	17	46	-147.9	413.46
2017	11	7	18	58	-158.6	412.84
2017	11	7	20	8	-152.6	412.50
2017	11	7	21	15	-164.4	414.68
2017	11	7	22	25	-167.1	415.98
2017	11	7	23	36	-170.9	418.64
2017	11	8	0	44	-191.1	425.10
2017	11	8	1	52	-204.1	430.59
2017	11	8	3	5	-228.8	442.66
2017	11	8	4	13	-185.8	421.89
2017	11	8	5	21	-175.4	417.98
2017	11	8	6	33	-174.7	427.08
2017	11	8	7	42	-161.5	422.94
2017	11	8	8	50	-171.0	426.49
2017	11	8	10	0	-158.7	416.44
2017	11	8	11	11	-172.1	415.90
2017	11	8	12	19	-147.1	411.78
2017	11	8	13	27	-138.3	411.32
2017	11	8	14	40	-207.8	417.75
2017	11	8	15	47	-230.7	423.04
2017	11	8	16	55	-212.3	422.64
2017	11	8	18	9	-188.2	419.62
2017	11	8	19	16	-182.6	419.76
2017	11	8	20	24	-194.5	421.16
2017	11	8	21	36	-184.1	420.98
2017	11	8	22	45	-146.8	415.04
2017	11	8	23	53	-152.0	417.18
2017	11	9	1	3	-153.0	415.28
2017	11	9	2	14	-152.8	416.72
2017	11	9	3	22	-156.3	417.13
2017	11	9	4	30	-159.5	417.05
2017	11	9	5	43	-157.7	417.44
2017	11	9	6	51	-154.7	416.32
2017	11	9	7	58	-146.2	415.56
2017	11	9	9	11	-146.5	414.38
2017	11	9	10	20	-142.5	412.77
2017	11	9	11	27	-138.2	412.25
2017	11	9	12	39	-134.2	411.49
2017	11	9	13	49	-135.2	411.50
2017	11	9	14	56	-133.4	411.23
2017	11	9	16	6	-125.4	412.42
2017	11	9	17	18	-136.2	411.81
2017	11	9	18	25	-131.0	411.58
2017	11	9	19	33	-131.7	411.34
2017	11	9	20	47	-140.1	412.54
2017	11	9	21	54	-143.0	413.50
2017	11	9	23	2	-147.7	415.19
2017	11	10	0	14	-170.7	424.11
2017	11	10	1	23	-158.6	417.53
2017	11	10	2	31	-148.4	415.64
2017	11	10	3	41	-176.7	428.30
2017	11	10	4	52	-143.5	415.91
2017	11	10	6	0	-139.4	414.45
2017	11	10	7	8	-150.9	421.00
2017	11	10	8	21	-134.3	412.20
2017	11	10	9	29	-129.0	410.73
2017	11	10	10	36	-127.2	410.79
2017	11	10	11	50	-129.9	410.57
2017	11	10	12	58	-132.7	409.83
2017	11	10	14	5	-136.0	409.98
2017	11	10	15	17	-133.1	410.95
2017	11	10	16	27	-139.7	411.26
2017	11	10	17	34	-141.2	412.37
2017	11	10	18	44	-138.3	413.04
2017	11	10	19	56	-144.3	412.60
2017	11	10	21	3	-153.6	413.32
2017	11	10	22	11	-136.7	413.68
2017	11	10	23	25	-140.6	412.81
2017	11	11	0	32	-140.9	413.02
2017	11	11	1	40	-154.9	414.65
2017	11	11	2	52	-163.4	415.53
2017	11	11	4	1	-194.4	420.36
2017	11	11	5	9	-202.8	422.25
2017	11	11	6	20	-146.6	414.11
2017	11	11	7	30	-137.8	415.05
2017	11	11	8	38	-133.9	413.35
2017	11	11	9	47	-124.6	411.13
2017	11	11	10	59	-132.4	411.89
2017	11	11	12	7	-140.4	413.64
2017	11	11	13	14	-145.4	413.91
2017	11	11	14	28	-151.3	415.00
2017	11	11	15	36	-153.9	414.77
2017	11	11	16	43	-142.2	412.34
2017	11	11	17	55	-141.2	413.02
2017	11	11	19	5	-142.8	413.03
2017	11	11	20	12	-140.3	413.16
2017	11	11	21	22	-132.6	413.36
2017	11	11	22	34	-140.7	412.26
2017	11	11	23	41	-135.8	411.62
2017	11	12	0	50	-135.6	411.60
2017	11	12	2	3	-138.1	412.55
2017	11	12	3	10	-141.8	413.45
2017	11	12	4	18	-143.8	413.93
2017	11	12	5	31	-147.3	413.01
2017	11	12	6	39	-142.5	412.69
2017	11	12	7	47	-141.8	414.10
2017	11	12	8	58	-137.8	414.69
2017	11	12	10	8	-133.9	411.11
2017	11	12	11	16	-130.8	410.42
2017	11	12	12	25	-128.5	411.05
2017	11	12	13	37	-123.4	411.04
2017	11	12	14	45	-124.4	410.25
2017	11	12	15	52	-132.2	410.97
2017	11	12	17	6	-142.0	412.05
2017	11	12	18	14	-144.1	411.37
2017	11	12	19	21	-147.8	413.81
2017	11	12	20	34	-165.0	420.73
2017	11	12	21	43	-162.3	420.84
2017	11	12	22	50	-157.1	420.12
2017	11	13	0	1	-137.6	414.12
2017	11	13	1	12	-146.2	413.51
2017	11	13	2	19	-176.0	426.18
2017	11	13	3	28	-138.4	412.28
2017	11	13	4	41	-145.6	413.12
2017	11	13	5	48	-150.8	413.00
2017	11	13	6	56	-144.7	413.08
2017	11	13	8	9	-144.5	411.36
2017	11	13	10	28	-139.2	410.43
2017	11	13	12	26	-134.3	410.31
2017	11	13	13	38	-133.3	410.22
2017	11	13	14	47	-145.2	411.47
2017	11	13	15	55	-143.2	411.16
2017	11	13	17	5	-139.0	411.19
2017	11	13	18	16	-146.7	411.87
2017	11	13	19	24	-150.5	413.17
2017	11	13	20	32	-159.0	414.44
2017	11	13	21	45	-153.7	413.49
2017	11	13	22	53	-149.2	413.98
2017	11	14	0	0	-145.6	413.22
2017	11	14	1	13	-150.9	413.47
2017	11	14	2	22	-172.0	416.55
2017	11	14	3	29	-185.2	418.18
2017	11	14	4	40	-185.9	418.09
2017	11	14	5	51	-180.5	417.17
2017	11	14	6	58	-191.6	418.87
2017	11	14	8	8	-203.9	420.10
2017	11	14	9	20	-209.3	420.80
2017	11	14	10	27	-200.6	419.73
2017	11	14	11	35	-171.4	414.74
2017	11	14	12	49	-164.8	414.66
2017	11	14	13	56	-164.8	414.85
2017	11	14	15	4	-140.1	411.92
2017	11	14	16	16	-145.4	412.81
2017	11	14	17	25	-159.1	414.67
2017	11	14	18	33	-160.0	414.72
2017	11	14	19	43	-167.6	415.29
2017	11	14	20	54	-173.6	416.59
2017	11	14	22	2	-168.8	416.55
2017	11	14	23	10	-174.9	420.17
2017	11	15	0	23	-189.2	423.01
2017	11	15	1	31	-171.8	420.65
2017	11	15	2	38	-161.5	416.65
2017	11	15	3	52	-148.5	416.16
2017	11	15	5	0	-142.7	415.69
2017	11	15	6	7	-162.3	419.70
2017	11	15	7	19	-169.7	419.66
2017	11	15	8	29	-155.1	416.66
2017	11	15	9	36	-149.7	414.54
2017	11	15	10	46	-149.5	412.21
2017	11	15	11	58	-151.1	412.82
2017	11	15	13	5	-145.5	412.40
2017	11	15	14	13	-147.4	411.78
2017	11	15	15	27	-144.9	412.68
2017	11	15	16	34	-150.1	413.13
2017	11	15	17	42	-152.6	413.95
2017	11	15	18	54	-161.2	416.98
2017	11	15	20	3	-163.8	415.97
2017	11	15	21	11	-162.5	414.08
2017	11	15	22	21	-152.2	413.21
2017	11	15	23	32	-152.8	412.98
2017	11	16	0	40	-147.8	414.10
2017	11	16	1	49	-150.0	415.21
2017	11	16	3	1	-153.5	414.83
2017	11	16	4	9	-148.6	413.69
2017	11	16	5	16	-148.0	413.78
2017	11	16	6	30	-162.2	415.89
2017	11	16	7	38	-166.0	415.84
2017	11	16	8	45	-162.5	414.85
2017	11	16	9	57	-156.8	412.95
2017	11	16	11	7	-153.9	413.08
2017	11	16	12	14	-145.8	412.57
2017	11	16	13	24	-148.2	412.34
2017	11	16	14	35	-146.6	412.82
2017	11	16	15	43	-144.9	413.16
2017	11	16	16	51	-156.4	414.23
2017	11	16	18	4	-151.2	414.34
2017	11	16	19	12	-151.5	413.23
2017	11	16	20	20	-147.1	413.42
2017	11	16	21	33	-137.8	413.06
2017	11	16	22	41	-141.5	412.05
2017	11	16	23	49	-126.4	411.84
2017	11	17	1	0	-118.1	412.28
2017	11	17	2	10	-132.0	412.70
2017	11	17	3	18	-145.3	413.14
2017	11	17	4	27	-127.8	414.00
2017	11	17	5	39	-118.3	412.73
2017	11	17	6	47	-140.6	412.57
2017	11	17	7	54	-149.0	412.71
2017	11	17	9	8	-142.2	411.79
2017	11	17	10	15	-140.6	412.15
2017	11	17	11	23	-127.0	411.03
2017	11	17	12	35	-115.4	409.68
2017	11	17	13	44	-116.7	409.46
2017	11	17	14	52	-130.5	409.25
2017	11	17	16	3	-132.2	409.53
2017	11	17	17	13	-127.9	410.53
2017	11	17	18	21	-112.4	410.42
2017	11	17	19	30	-120.9	410.55
2017	11	17	20	42	-133.1	410.61
2017	11	17	21	50	-131.5	410.37
2017	11	17	22	58	-125.9	411.26
2017	11	18	0	11	-148.1	413.24
2017	11	18	1	19	-157.5	413.04
2017	11	18	2	26	-160.6	411.91
2017	11	18	3	38	-155.6	412.29
2017	11	18	4	48	-143.7	411.96
2017	11	18	5	55	-151.2	411.66
2017	11	18	7	5	-151.9	411.92
2017	11	18	8	17	-147.3	411.89
2017	11	18	9	24	-140.1	413.10
2017	11	18	10	32	-163.7	415.67
2017	11	18	11	46	-184.4	417.78
2017	11	18	12	53	-178.8	416.15
2017	11	18	14	1	-164.3	414.35
2017	11	18	15	14	-171.3	414.94
2017	11	18	16	22	-173.6	415.89
2017	11	18	17	30	-172.9	415.61
2017	11	18	18	41	-164.4	416.00
2017	11	18	19	51	-147.8	416.27
2017	11	18	20	59	-141.3	415.42
2017	11	18	22	8	-145.4	415.15
2017	11	18	23	20	-153.9	414.15
2017	11	19	0	28	-147.7	413.54
2017	11	19	1	36	-145.8	412.95
2017	11	19	2	49	-161.5	416.77
2017	11	19	3	57	-161.6	416.53
2017	11	19	5	4	-167.1	415.93
2017	11	19	6	17	-169.9	418.03
2017	11	19	7	26	-159.9	416.80
2017	11	19	8	33	-129.1	413.06
2017	11	19	9	44	-121.5	412.36
2017	11	19	10	55	-122.7	412.74
2017	11	19	12	2	-124.6	413.03
2017	11	19	13	11	-138.8	412.18
2017	11	19	14	24	-133.4	411.59
2017	11	19	15	31	-126.2	412.92
2017	11	19	16	39	-133.0	414.07
2017	11	19	17	52	-152.6	416.42
2017	11	19	19	0	-158.0	414.64
2017	11	19	20	8	-138.5	413.89
2017	11	19	21	19	-134.7	416.63
2017	11	19	22	29	-126.9	414.22
2017	11	19	23	37	-128.2	413.65
2017	11	20	0	46	-112.9	413.12
2017	11	20	1	58	-127.9	413.24
2017	11	20	3	6	-121.0	413.01
2017	11	20	4	14	-122.8	413.16
2017	11	20	5	27	-127.3	413.18
2017	11	20	6	35	-130.4	413.19
2017	11	20	7	59	-135.3	412.69
2017	11	20	11	39	-147.9	411.41
2017	11	20	12	48	-148.6	411.24
2017	11	20	13	56	-131.9	411.39
2017	11	20	15	6	-134.1	412.31
2017	11	20	16	17	-159.6	415.15
2017	11	20	17	25	-176.1	419.45
2017	11	20	18	34	-154.4	415.72
2017	11	20	19	46	-136.8	414.43
2017	11	20	20	54	-131.3	413.07
2017	11	20	22	1	-129.3	412.51
2017	11	20	23	15	-131.5	412.75
2017	11	21	0	23	-131.4	413.14
2017	11	21	1	30	-132.8	415.16
2017	11	21	2	42	-166.5	414.72
2017	11	21	3	52	-143.9	413.53
2017	11	21	4	59	-130.3	413.32
2017	11	21	6	9	-124.2	413.79
2017	11	21	7	21	-148.2	413.77
2017	11	21	8	28	-160.2	417.24
2017	11	21	9	36	-151.6	414.43
2017	11	21	10	50	-141.5	411.63
2017	11	21	11	57	-142.1	412.19
2017	11	21	13	5	-148.5	411.23
2017	11	21	14	18	-152.0	411.89
2017	11	21	15	26	-145.7	412.41
2017	11	21	16	34	-156.1	414.40
2017	11	21	17	45	-167.4	418.07
2017	11	21	18	55	-145.8	412.30
2017	11	21	20	3	-142.6	415.46
2017	11	21	21	12	-167.1	416.42
2017	11	21	22	24	-152.0	413.27
2017	11	21	23	32	-149.3	413.43
2017	11	22	0	39	-151.6	414.60
2017	11	22	1	53	-155.5	413.60
2017	11	22	3	1	-153.1	414.29
2017	11	22	4	8	-156.8	414.82
2017	11	22	5	20	-149.5	417.40
2017	11	22	6	30	-165.0	414.97
2017	11	22	7	37	-173.9	413.86
2017	11	22	8	48	-166.0	413.87
2017	11	22	9	58	-162.3	414.09
2017	11	22	11	6	-160.4	415.03
2017	11	22	12	15	-192.4	415.81
2017	11	22	13	27	-175.8	414.77
2017	11	22	14	35	-153.6	412.93
2017	11	22	15	43	-138.4	411.70
2017	11	22	16	56	-155.4	410.92
2017	11	22	18	4	-162.9	411.39
2017	11	22	19	11	-158.0	411.63
2017	11	22	20	23	-154.6	413.37
2017	11	22	21	33	-181.7	416.67
2017	11	22	22	40	-206.1	418.32
2017	11	22	23	50	-196.3	420.21
2017	11	23	1	2	-202.8	419.51
2017	11	23	2	9	-200.3	417.46
2017	11	23	3	17	-184.8	417.45
2017	11	23	4	31	-179.1	417.23
2017	11	23	5	38	-175.7	417.96
2017	11	23	6	46	-184.4	417.63
2017	11	23	7	59	-189.9	423.11
2017	11	23	9	7	-174.5	420.17
2017	11	23	10	15	-169.2	418.23
2017	11	23	11	26	-185.3	419.53
2017	11	23	12	36	-146.1	414.84
2017	11	23	13	44	-141.5	414.66
2017	11	23	14	53	-139.0	415.06
2017	11	23	16	5	-144.5	416.48
2017	11	23	17	13	-149.3	417.20
2017	11	23	18	20	-142.0	416.36
2017	11	23	19	34	-181.6	415.75
2017	11	23	20	42	-176.2	415.13
2017	11	23	21	49	-148.6	414.11
2017	11	23	23	1	-145.0	416.33
2017	11	24	0	11	-151.0	416.51
2017	11	24	1	18	-157.2	419.02
2017	11	24	2	29	-150.5	417.57
2017	11	24	3	40	-145.1	414.90
2017	11	24	4	47	-155.9	417.74
2017	11	24	5	56	-147.1	414.72
2017	11	24	7	9	-168.8	419.14
2017	11	24	8	16	-149.6	414.53
2017	11	24	9	24	-167.0	418.81
2017	11	24	10	37	-171.0	418.12
2017	11	24	11	45	-153.3	415.00
2017	11	24	12	53	-163.2	413.54
2017	11	24	14	4	-177.8	414.86
2017	11	24	15	14	-168.5	414.33
2017	11	24	16	22	-174.6	417.72
2017	11	24	17	31	-181.8	419.28
2017	11	24	18	43	-193.4	426.45
2017	11	24	19	51	-171.3	420.36
2017	11	24	20	58	-169.2	415.98
2017	11	24	22	12	-169.0	415.96
2017	11	24	23	20	-164.2	415.82
2017	11	25	0	27	-180.0	415.85
2017	11	25	1	40	-169.6	415.83
2017	11	25	2	49	-173.4	418.24
2017	11	25	3	56	-182.5	419.48
2017	11	25	5	7	-180.4	417.49
2017	11	25	6	18	-186.0	420.36
2017	11	25	7	25	-165.8	417.42
2017	11	25	8	34	-141.3	414.45
2017	11	25	9	47	-165.2	415.11
2017	11	25	10	54	-175.7	415.90
2017	11	25	12	2	-190.7	414.72
2017	11	25	13	15	-183.3	415.05
2017	11	25	14	23	-165.0	413.74
2017	11	25	15	31	-163.6	413.97
2017	11	25	16	43	-158.9	415.25
2017	11	25	17	52	-163.7	415.20
2017	11	25	19	0	-177.2	415.60
2017	11	25	20	10	-180.0	415.87
2017	11	25	21	21	-178.1	417.67
2017	11	25	22	29	-186.9	419.10
2017	11	25	23	37	-171.1	418.27
2017	11	26	0	50	-167.8	417.61
2017	11	26	1	58	-169.1	416.43
2017	11	26	3	5	-177.1	415.76
2017	11	26	4	18	-156.5	416.13
2017	11	26	5	27	-177.3	417.28
2017	11	26	6	34	-179.5	417.05
2017	11	26	7	45	-179.8	416.65
2017	11	26	8	56	-186.8	417.18
2017	11	26	10	3	-175.3	416.67
2017	11	26	11	12	-145.8	413.73
2017	11	26	12	25	-155.1	414.15
2017	11	26	13	32	-152.4	414.77
2017	11	26	14	40	-148.4	415.22
2017	11	26	15	54	-156.9	414.33
2017	11	26	17	1	-153.8	414.59
2017	11	26	18	9	-152.8	414.98
2017	11	26	19	21	-152.6	414.39
2017	11	26	20	30	-166.9	414.57
2017	11	26	21	38	-176.1	414.86
2017	11	26	22	48	-181.3	415.45
2017	11	26	23	59	-175.7	417.84
2017	11	27	1	7	-173.6	416.01
2017	11	27	2	15	-172.7	414.73
2017	11	27	3	28	-167.2	414.22
2017	11	27	4	36	-164.0	414.42
2017	11	27	5	43	-167.6	415.20
2017	11	27	6	56	-151.2	413.02
2017	11	27	8	5	-147.5	411.19
2017	11	27	9	36	-139.1	410.60
2017	11	27	12	50	-148.3	412.09
2017	11	27	14	0	-153.2	411.22
2017	11	27	15	7	-147.2	411.17
2017	11	27	16	17	-126.8	410.04
2017	11	27	17	29	-177.6	425.83
2017	11	27	18	36	-155.4	414.47
2017	11	27	19	44	-151.5	412.73
2017	11	27	20	58	-158.7	413.63
[truncated: 7,225 more rows]
